# Supplementary material for: New Phenylglycinamide Derivatives with Hybrid Structure as Candidates for New Broad-Spectrum Anticonvulsants
Source: MDPI journal article supplement (doi:10.3390/cells11121862), 2022-06-07

## New phenyl-glycinamide derivatives with hybrid structure as candidates on new effective anticonvulsants

Marcin Jakubiec <sup>1</sup>, Michał Abram <sup>1</sup>, Mirosław Zagaja <sup>2</sup>, Marta Andres-Mach <sup>2</sup>, Aleksandra Szewczyk <sup>2</sup>, Gniewomir Latacz <sup>3</sup>, Bartłomiej Szulczyk <sup>4</sup>, Katarzyna Socala <sup>5</sup>, Dorota Nieoczym <sup>5</sup>, Piotr Właz <sup>5</sup>, Cameron Metcalf <sup>5</sup>, Karen Wilcox <sup>5</sup>, Rafał M. Kamiński <sup>1</sup> and Krzysztof Kamiński <sup>1</sup>

<sup>1</sup> Department of Medicinal Chemistry, Faculty of Pharmacy, Jagiellonian University Medical College, Medyczna 9, 30-688 Krakow, Poland; marcin.jakubiec@doctoral.uj.edu.pl (M.J.); michal.abram@uj.edu.pl (M.A.); rafa1.kaminski@uj.edu.pl (R.M.K.)

<sup>2</sup> Isobolographic Analysis Laboratory, Institute of Rural Health, Jaczewskiego 2, 20-950 Lublin, Poland; zagaja.miroslaw@imw.lublin.pl (M.Z.); andres.marta@imw.lublin.pl (M.A.-M.); szewczyk.aleksandra@imw.lublin.pl (A.S.)

<sup>3</sup> Department of Technology and Biotechnology of Drugs, Faculty of Pharmacy, Jagiellonian University Medical College, Medyczna 9, 30-688 Krakow, Poland; gniewomir.latacz@uj.edu.pl

<sup>4</sup> Department of Pharmacodynamics, Centre for Preclinical Research and Technology, Medical University of Warsaw, Banacha 1B, 02-097 Warsaw, Poland; bartlomiej.szulczyk@wum.edu.pl

<sup>5</sup> Department of Animal Physiology and Pharmacology, Institute of Biological Sciences, Faculty of Biology and Biotechnology, Maria Curie-Skłodowska University, Akademicka 19, 20-033 Lublin, Poland; katarzyna.socala@mail.umcs.pl (K.S.); dorota.nieoczym@mail.umcs.pl (D.N.); piotr.wlaz@mail.umcs.pl (P.W.)

<sup>6</sup> Department of Pharmacology and Toxicology, University of Utah, Salt Lake City, UT 84112, USA

\* Correspondence: k.kaminski@uj.edu.pl; Tel.: +48-12-620-54-5

### Table of contents

|                                                                                                                    |    |
|--------------------------------------------------------------------------------------------------------------------|----|
| Table S1. Anticonvulsant activity screening data for compounds 45–66 and BCTC in mice <i>i.p.</i> .....            | 2  |
| Table S2. Radioligand binding and functional assays.....                                                           | 3  |
| Table S3. <i>In vitro</i> functional assays of compounds 45–66 for TRPV1 channel (concentration 100 µM). .         | 3  |
| Figure S1. The MetaSite 6.0.1. software prediction of the most probably sites of tested compounds metabolism. .... | 4  |
| Figure S2. UPLC spectra after 120 min incubation of compound 53 with human liver microsomes .....                  | 5  |
| Figure S3. MS ion fragment analyses and the most probable structure of 53 metabolite M1.....                       | 5  |
| Figure S4. UPLC spectra after 120 min incubation of compound 60 with human liver microsomes .....                  | 6  |
| Figure S5. MS ion fragment analyses and the most probable structure of 60 metabolites M1–M2. ....                  | 6  |
| Figure S6. UPLC spectra after 120 min incubation of compound 62 with human liver microsomes .....                  | 7  |
| Figure S7. MS ion fragment analyses and the most probable structure of 62 metabolites M1–M2. ....                  | 7  |
| Figure S8. UPLC spectra after 120 min incubation of the reference drug verapamil with human liver microsomes ..... | 8  |
| References:.....                                                                                                   | 9  |
| <sup>1</sup> H NMR and <sup>13</sup> C NMR spectra for the final compounds (45–66).....                            | 10 |

## Supporting Information

**Table S1.** Anticonvulsant activity screening data for compounds **45–66** and **BCTC** in mice *i.p.*

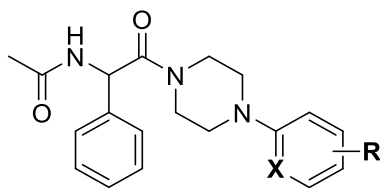

| Cmpd              | X | R                                | MES <sup>a</sup> | 6 Hz (32 mA) <sup>b</sup> | scPTZ <sup>c</sup> |
|-------------------|---|----------------------------------|------------------|---------------------------|--------------------|
| 45                | C | H                                | 3/4              | 3/4                       | 0/4                |
| 46                | C | 2-Cl                             | 0/4              | 2/4                       | -                  |
| 47                | C | 3-Cl                             | 0/4              | 3/4                       | -                  |
| 48                | C | 4-Cl                             | 1/4              | 3/4                       | -                  |
| 49                | C | 3,4-diCl                         | 0/4              | 1/4                       | -                  |
| 50                | C | 3,5-diCl                         | 0/1              | 1/4                       | -                  |
| 51                | C | 3-Cl,5-CF <sub>3</sub>           | 0/4              | 1/4                       | -                  |
| 52                | C | 2-CF <sub>3</sub>                | 0/4              | 2/4                       | -                  |
| 53                | C | 3-CF <sub>3</sub>                | 3/4              | 4/4                       | 1/4                |
| 54                | C | 4-CF <sub>3</sub>                | 0/4              | 2/4                       | -                  |
| 55                | C | 3,5-diCF <sub>3</sub>            | 0/4              | 1/4                       | -                  |
| 56                | C | 3-CH <sub>3</sub>                | 0/4              | 1/4                       | -                  |
| 57                | C | 3-CHF <sub>2</sub>               | 0/4              | 1/4                       | -                  |
| 58                | C | 3-C <sub>6</sub> H <sub>5</sub>  | 0/4              | 2/4                       | -                  |
| 59                | C | 3-OCH <sub>3</sub>               | 0/4              | -                         | -                  |
| 60                | C | 3-OCF <sub>3</sub>               | 3/4              | 4/4                       | 1/4                |
| 61                | C | 3-OC <sub>6</sub> H <sub>5</sub> | 0/4              | 1/4                       | -                  |
| 62                | C | 3-SCF <sub>3</sub>               | 3/4              | 4/4                       | 0/4                |
| 63                | N | 3-CF <sub>3</sub>                | 0/4              | -                         | -                  |
| 64                | N | 4-CF <sub>3</sub>                | 0/4              | 1/4                       | -                  |
| 65                | N | 5-CF <sub>3</sub>                | 3/4              | 3/4                       | 0/4                |
| 66                | N | 6-CF <sub>3</sub>                | 0/4              | 2/4                       | -                  |
| BCTC <sup>d</sup> | - | -                                | 0/4              | 0/4                       | 0/4                |

Data indicate number of mice protected/number of mice tested. Dose of 100 mg/kg was administered *i.p.* The animals were examined at 0.5 h. The most potent compounds are marked in blue. A dash indicates not tested. <sup>a</sup> MES – maximal electroshock seizure test; <sup>b</sup> 6 Hz – psychomotor seizure test, 32 mA; <sup>c</sup> scPTZ – subcutaneous pentylenetetrazole seizure test. <sup>d</sup> BCTC – model TRPV1 antagonist

## Supporting Information

**Table S2.** Radioligand binding and functional assays.

| Binding studies                                                                              |        |
|----------------------------------------------------------------------------------------------|--------|
| Na <sup>+</sup> channel (site 2)                                                             | [1]    |
| Calcium Cav <sub>1.2</sub> channels (dihydropyridine site, antagonist radioligand)           | [2]    |
| NMDA (antagonist radioligand)                                                                | [3]    |
| N-type Ca <sup>2+</sup> (antagonist radioligand)                                             | [4]    |
| GABA transporter (antagonist radioligand)                                                    | [5]    |
| GABA <sub>A</sub> ion channel [ <sup>3</sup> H]GABA (agonist radioligand)                    | [6]    |
| Potassium channel (hERG)                                                                     | [7]    |
| Functional studies                                                                           |        |
| TRPV1 (VR1) (h) (antagonist effect)                                                          | [8]    |
| Cav <sub>1.2</sub> (L-type) (h) calcium ion channel cell-based antagonist calcium flux assay | [9,10] |

Assays were performed commercially in Eurofins Laboratories (Poitiers, France) or Eurofins Panlabs Discovery Services Taiwan, Ltd. (New Taipei City, Taiwan).

**Table S3.** *In vitro* TRPV1 channel antagonist activity for compounds **45–66** (concentration of 100 μM).

| TRPV1 (VR1) (h) (antagonist effect)* |                                                       |           |                                                       |
|--------------------------------------|-------------------------------------------------------|-----------|-------------------------------------------------------|
| Cmpd                                 | % Inhibition of control agonist response <sup>a</sup> | Cmpd      | % Inhibition of control agonist response <sup>a</sup> |
| <b>45</b>                            | 36.1                                                  | <b>56</b> | 57.4                                                  |
| <b>46</b>                            | 116.3                                                 | <b>57</b> | 43.7                                                  |
| <b>47</b>                            | 125.2                                                 | <b>58</b> | 92.0                                                  |
| <b>48</b>                            | 126.9                                                 | <b>59</b> | 20.1                                                  |
| <b>49</b>                            | 135.1                                                 | <b>60</b> | 109.7                                                 |
| <b>50</b>                            | 128.0                                                 | <b>61</b> | 52.5                                                  |
| <b>51</b>                            | -2.5                                                  | <b>62</b> | 135.1                                                 |
| <b>52</b>                            | 90.9                                                  | <b>63</b> | -2.8                                                  |
| <b>53</b>                            | 128.5                                                 | <b>64</b> | 39.7                                                  |
| <b>54</b>                            | 128.5                                                 | <b>65</b> | 8.5                                                   |
| <b>55</b>                            | -14.0                                                 | <b>66</b> | 3.7                                                   |

\*Source: human recombinant CHO cells. <sup>a</sup> **Results showing activity higher than 50% are considered to represent significant effects of the test compounds**; results showing an inhibition between 25% and 50% are indicative of weak effect; results showing an inhibition lower than 25% are not considered significant and mostly attributable to variability of the signal around the control level. Assays were performed commercially in Eurofins Laboratories (Poitiers, France).

## Supporting Information

ADME-Tox in vitro - metabolic stability of compounds **53**, **60**, and **62**.

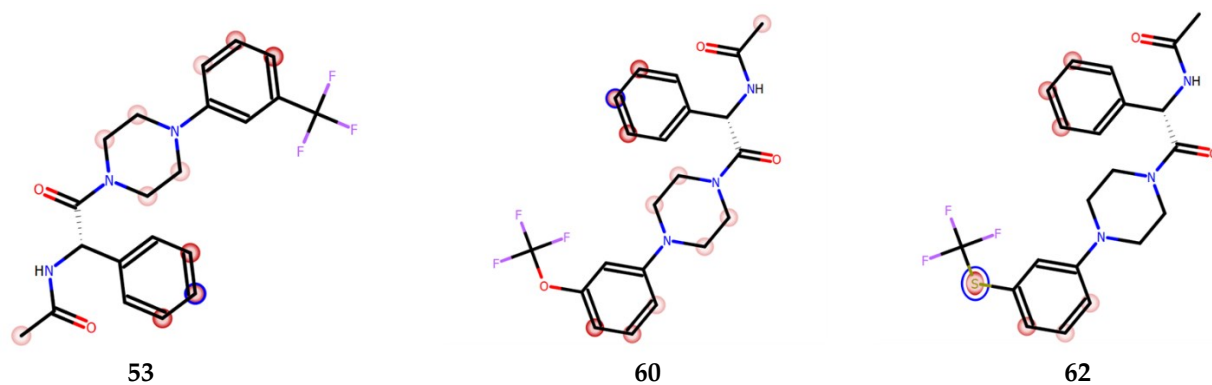

**Figure S1.** The MetaSite 6.0.1. software prediction of the most probably sites of tested compounds metabolism. The darker red color - the higher probability to be involved in the metabolism pathway. The blue circle marked the site of compound with the highest probability of metabolic bioconversion.

## Supporting Information

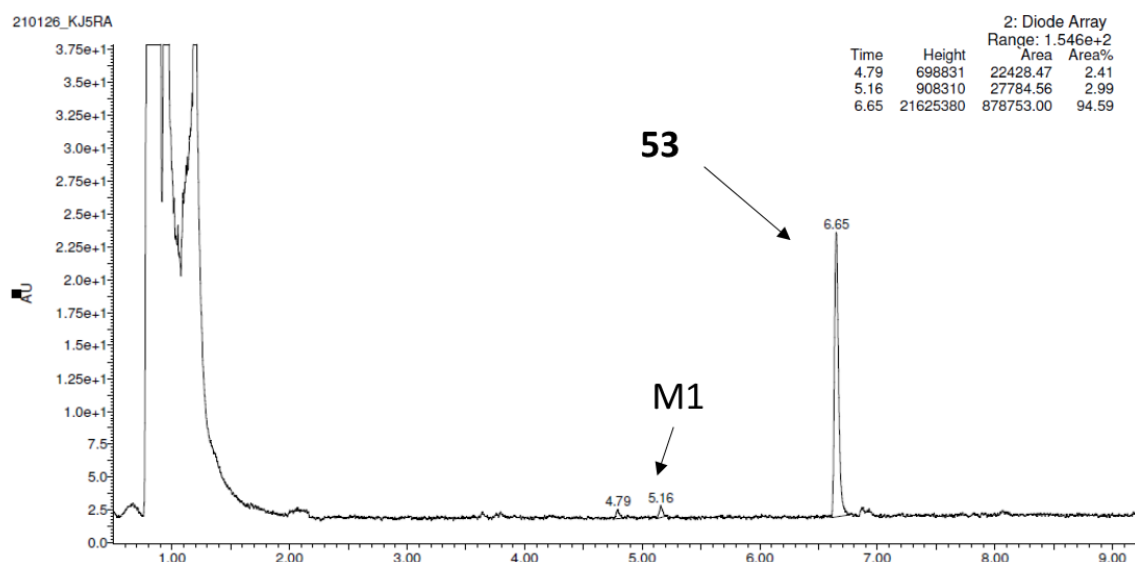

**Figure S2.** UPLC spectra after 120 min incubation of compound **53** with human liver microsomes in TRIS buffer pH=7.4 at 37°C.

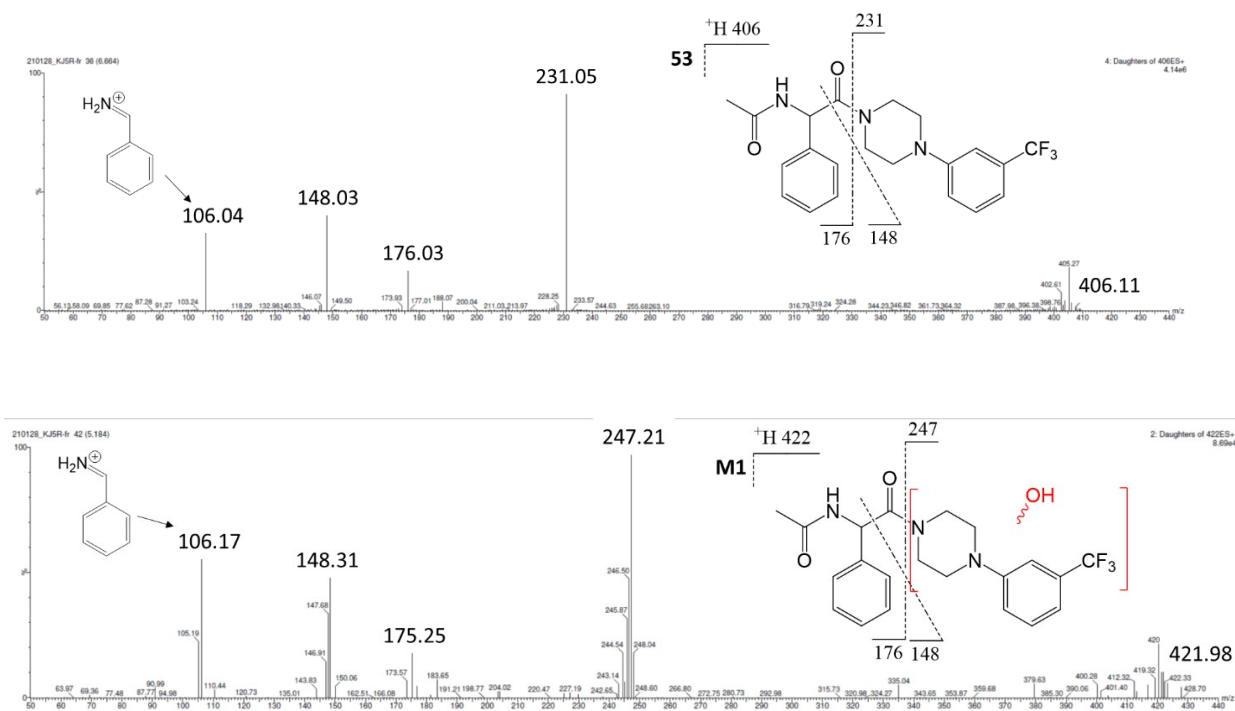

**Figure S3.** MS ion fragment analyses and the most probable structure of **53** metabolite **M1**.

## Supporting Information

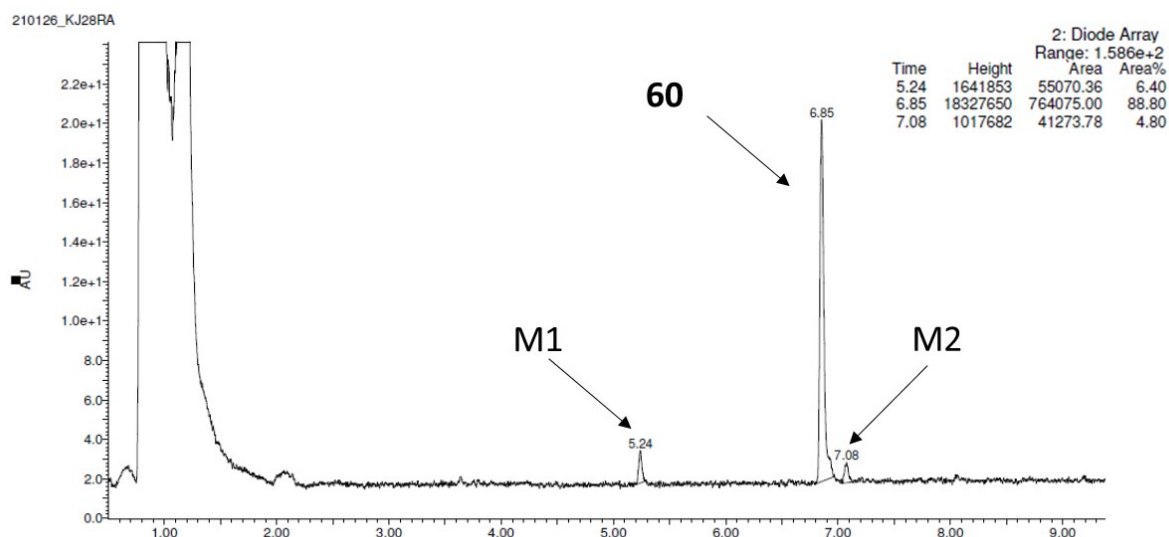

**Figure S4.** UPLC spectra after 120 min incubation of compound **60** with human liver microsomes in TRIS buffer pH=7.4 at 37°C.

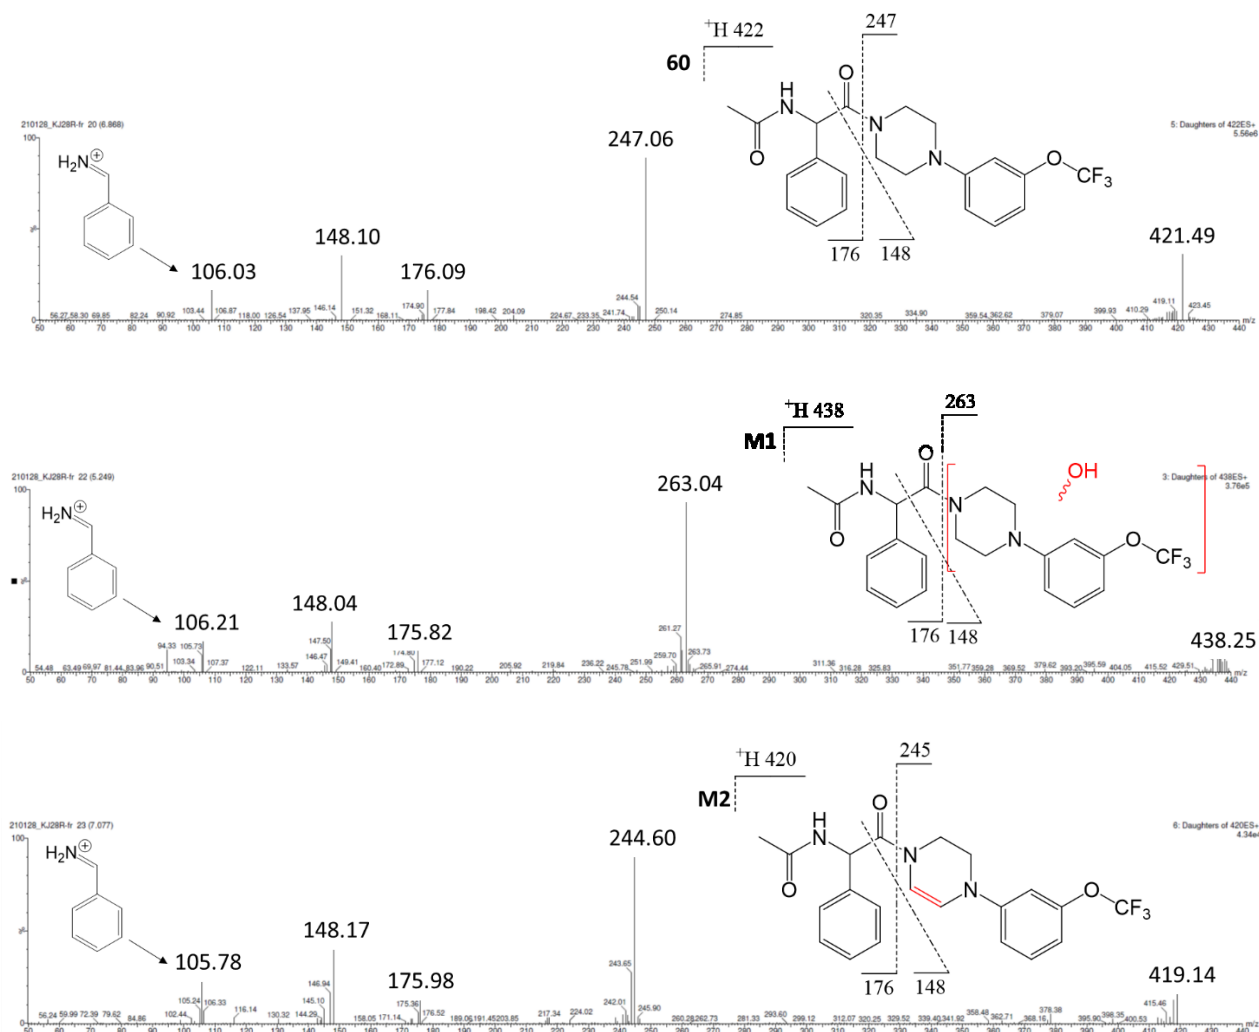

**Figure S5.** MS ion fragment analyses and the most probable structure of **60** metabolites **M1**–**M2**.

## Supporting Information

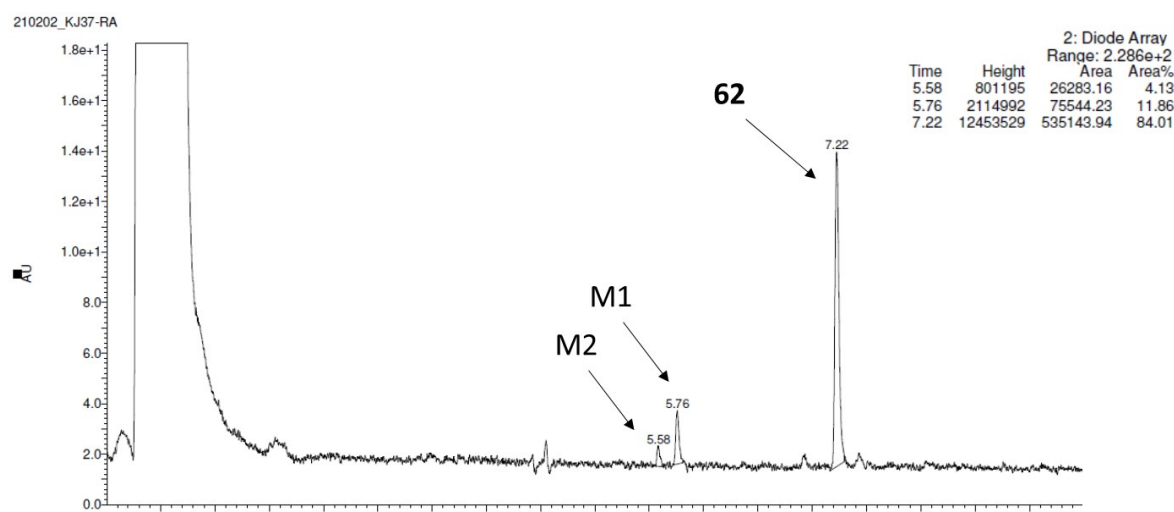

**Figure S6.** UPLC spectra after 120 min incubation of compound **62** with human liver microsomes in TRIS buffer pH=7.4 at 37°C.

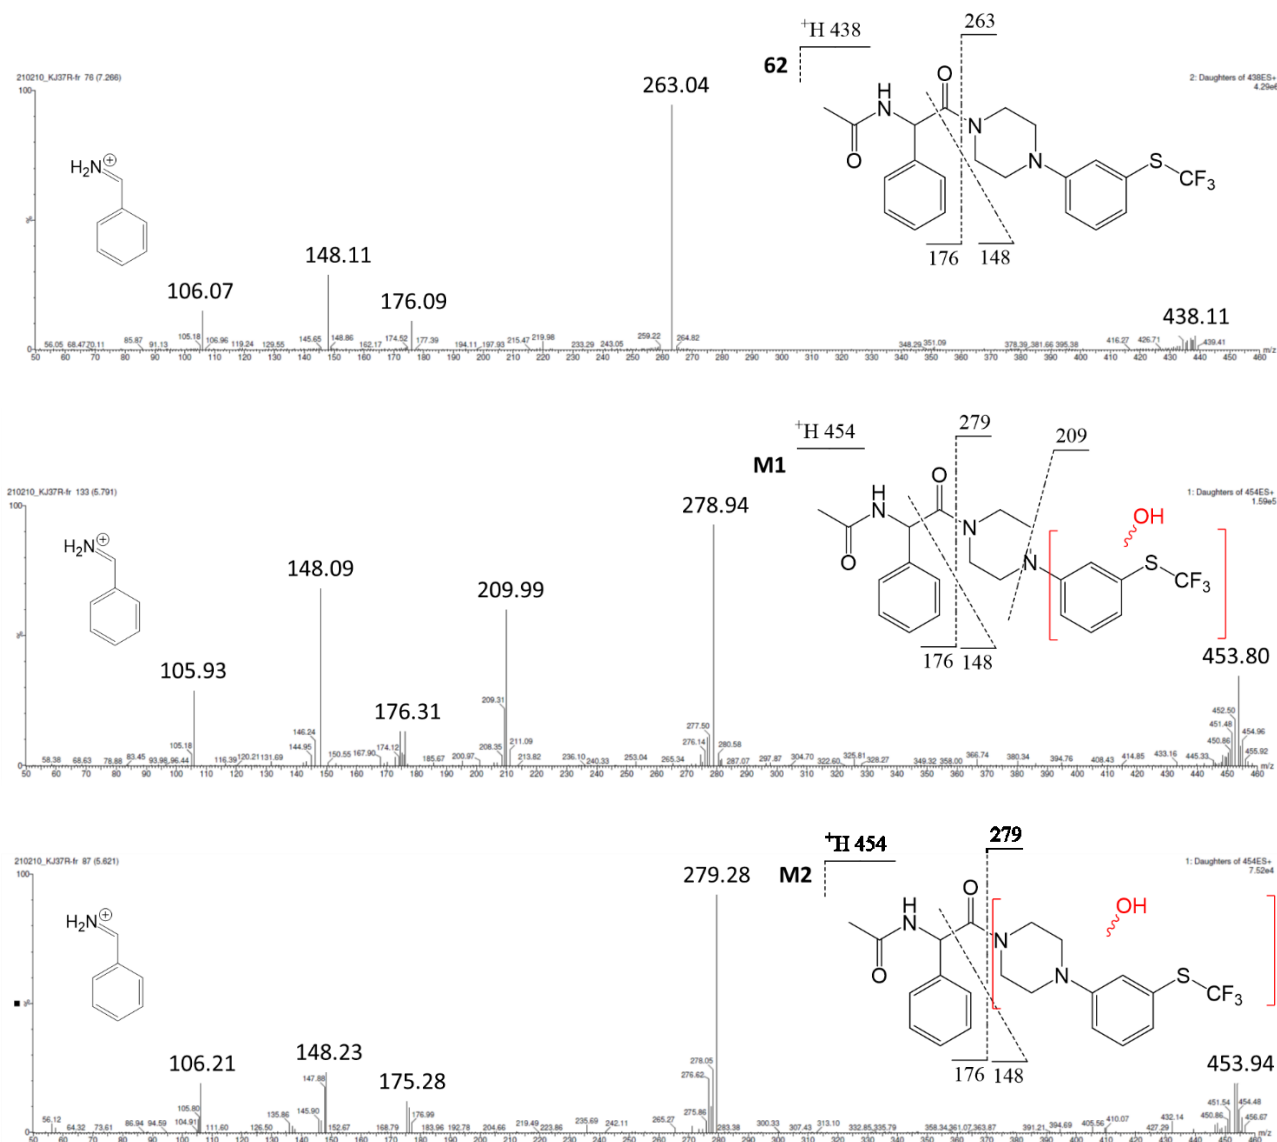

**Figure S7.** MS ion fragment analyses and the most probable structure of **62** metabolites **M1**–**M2**.

## Supporting Information

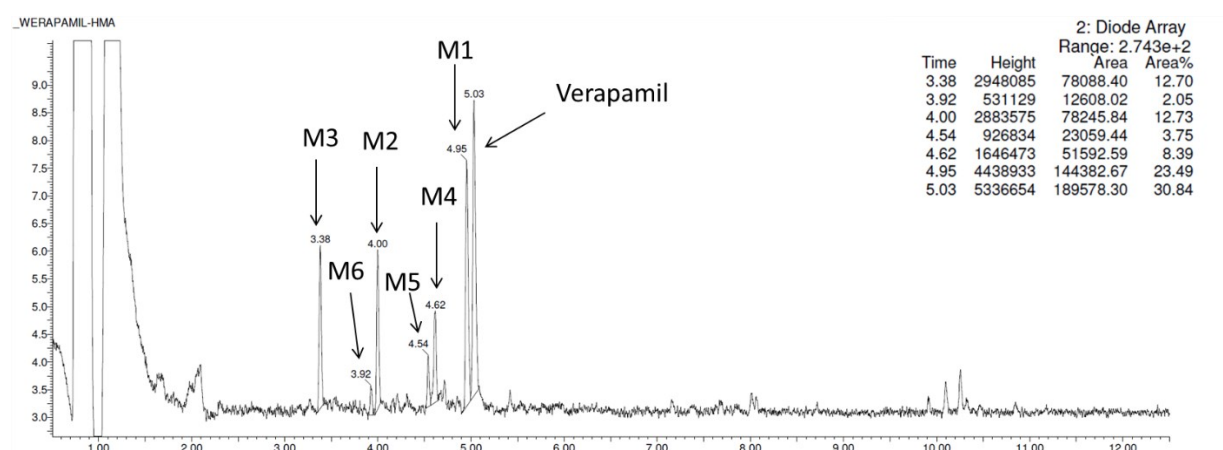

**Figure S8.** UPLC spectra after 120 min incubation of the reference drug verapamil with human liver microsomes in TRIS buffer pH=7.4 at 37°C [11–13]



## Supporting Information

### References:

1. Brown, G.B. 3H-Batrachotoxinin-A Benzoate Binding to Voltage-Sensitive Sodium Channels: Inhibition by the Channel Blockers Tetrodotoxin and Saxitoxin. *J. Neurosci.* **1986**, *6*, 2064–2070, doi:10.1523/JNEUROSCI.06-07-02064.1986.
2. Gould, R.J.; Murphy, K.M.; Snyder, S.H. [3H]Nitrendipine-Labeled Calcium Channels Discriminate Inorganic Calcium Agonists and Antagonists. *Proc. Natl. Acad. Sci. U.S.A.* **1982**, *79*, 3656–3660, doi:10.1073/pnas.79.11.3656.
3. Sills, M.A.; Fagg, G.; Pozza, M.; Angst, C.; Brundish, D.E.; Hurt, S.D.; Jay Wilusz, E.; Williams, M. [3H]CGP 39653: A New N-Methyl-D-Aspartate Antagonist Radioligand with Low Nanomolar Affinity in Rat Brain. *Eur. J. Pharmacol.* **1991**, *192*, 19–24, doi:10.1016/0014-2999(91)90063-V.
4. Wagner, J.A.; Snowman, A.M.; Biswas, A.; Olivera, B.M.; Snyder, S.H. Omega-Conotoxin GVIA Binding to a High-Affinity Receptor in Brain: Characterization, Calcium Sensitivity, and Solubilization. *J. Neurosci.* **1988**, *8*, 3354–3359, doi:10.1523/JNEUROSCI.08-09-03354.1988.
5. Shank, R.P.; Baldy, W.J.; Mattucci, L.C.; Villani Jr., F.J. Ion and Temperature Effects on the Binding of  $\gamma$ -Aminobutyrate to Its Receptors and the High-Affinity Transport System. *J. Neurochem.* **1990**, *54*, 2007–2015, doi:10.1111/j.1471-4159.1990.tb04905.x.
6. Eurofins Discovery  
<https://www.eurofinsdiscoveryservices.com/catalogmanagement/viewitem/non-selective-rat-gabaa-ion-channel-3h-muscimol-binding-agonist-radioligand-assay-panlabs/226500> (Accessed 2021-12-15).
7. Huang, X.-P.; Mangano, T.; Hufeisen, S.; Setola, V.; Roth, B.L. Identification of Human Ether-à-Go-Go Related Gene Modulators by Three Screening Platforms in an Academic Drug-Discovery Setting. *ASSAY and Drug Dev. Technol.* **2010**, *8*, 727–742, doi:10.1089/adt.2010.0331.
8. Phelps, P.T.; Anthes, J.C.; Correll, C.C. Cloning and Functional Characterization of Dog Transient Receptor Potential Vanilloid Receptor-1 (TRPV1). *Eur. J. Pharmacol.* **2005**, *513*, 57–66, doi:10.1016/j.ejphar.2005.02.045.
9. Sirenko, O.; Crittenden, C.; Callamaras, N.; Hesley, J.; Chen, Y.-W.; Funes, C.; Rusyn, I.; Anson, B.; Cromwell, E.F. Multiparameter In Vitro Assessment of Compound Effects on Cardiomyocyte Physiology Using iPSC Cells. *J. Biomol. Screen.* **2013**, *18*, 39–53, doi:10.1177/1087057112457590.
10. Xia, M.; Imredy, J.P.; Koblan, K.S.; Bennett, P.; Connolly, T.M. State-Dependent Inhibition of L-Type Calcium Channels: Cell-Based Assay in High-Throughput Format. *Anal. Biochem.* **2004**, *327*, 74–81, doi:10.1016/j.ab.2004.01.003.
11. Obach, R.S. Prediction of Human Clearance of Twenty-Nine Drugs from Hepatic Microsomal Intrinsic Clearance Data: An Examination of In Vitro Half-Life Approach and Nonspecific Binding to Microsomes. *Drug. Metab. Dispos.* **1999**, *27*, 1350–1359.
12. Pauli-Magnus, C.; Richter, O. von; Burk, O.; Ziegler, A.; Mettang, T.; Eichelbaum, M.; Fromm, M.F. Characterization of the Major Metabolites of Verapamil as Substrates and Inhibitors of P-Glycoprotein. *J. Pharmacol. Exp. Ther.* **2000**, *293*, 376–382.
13. Więckowska, A.; Wichur, T.; Godyń, J.; Bucki, A.; Marcinkowska, M.; Siwek, A.; Więckowski, K.; Zaręba, P.; Knez, D.; Głuch-Lutwin, M.; et al. Novel Multitarget-Directed Ligands Aiming at Symptoms and Causes of Alzheimer's Disease. *ACS Chem. Neurosci.* **2018**, *9*, 1195–1214, doi:10.1021/acscchemneuro.8b00024.

## Supporting Information

$^1\text{H}$  NMR and  $^{13}\text{C}$  NMR spectra for the final compounds (45–66)

*N*-(2-oxo-1-phenyl-2-(4-phenylpiperazin-1-yl)ethyl)acetamide (45) –  $^1\text{H}$  NMR

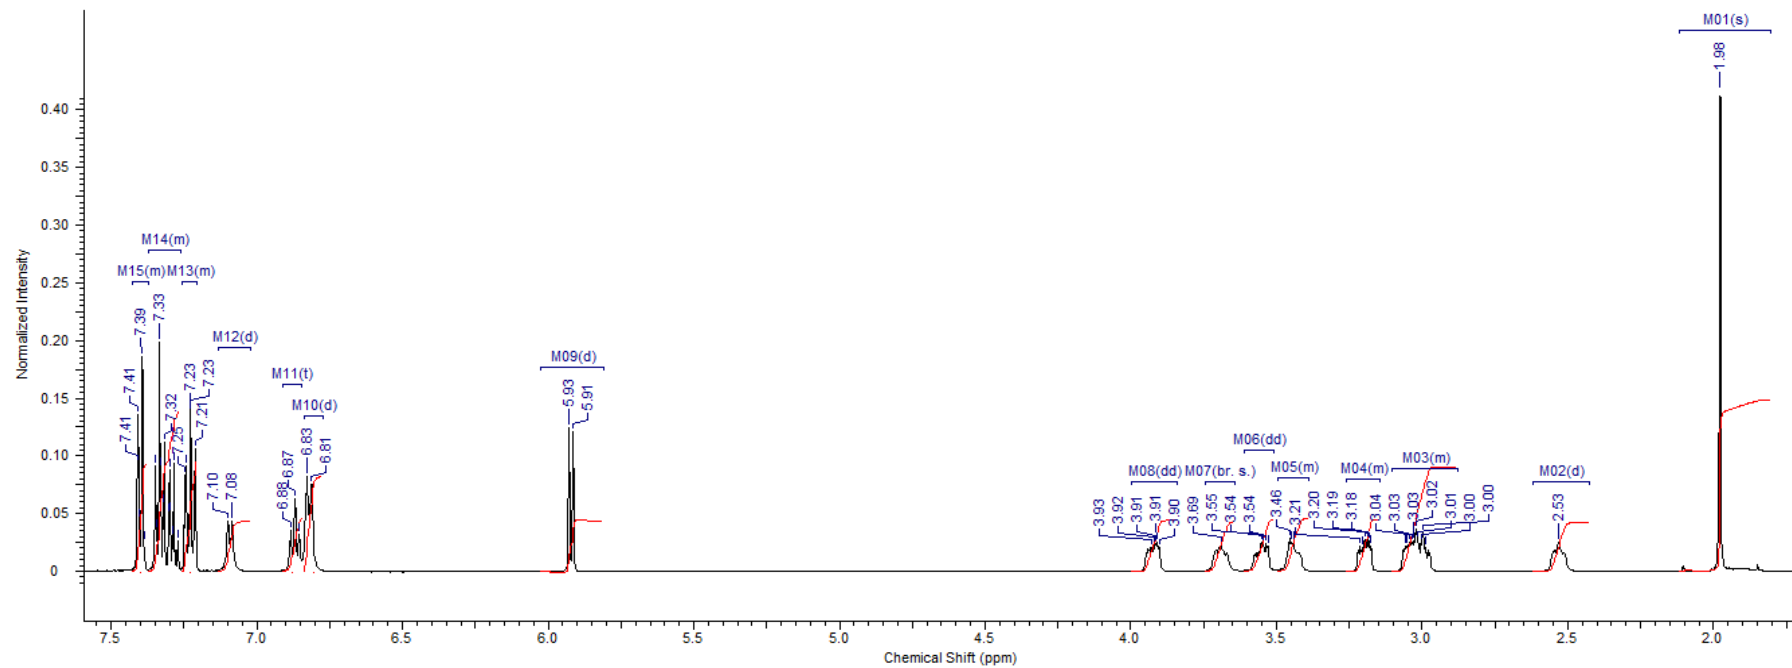

## Supporting Information

### *N*-(2-oxo-1-phenyl-2-(4-phenylpiperazin-1-yl)ethyl)acetamide (45) – $^{13}\text{C}$ NMR

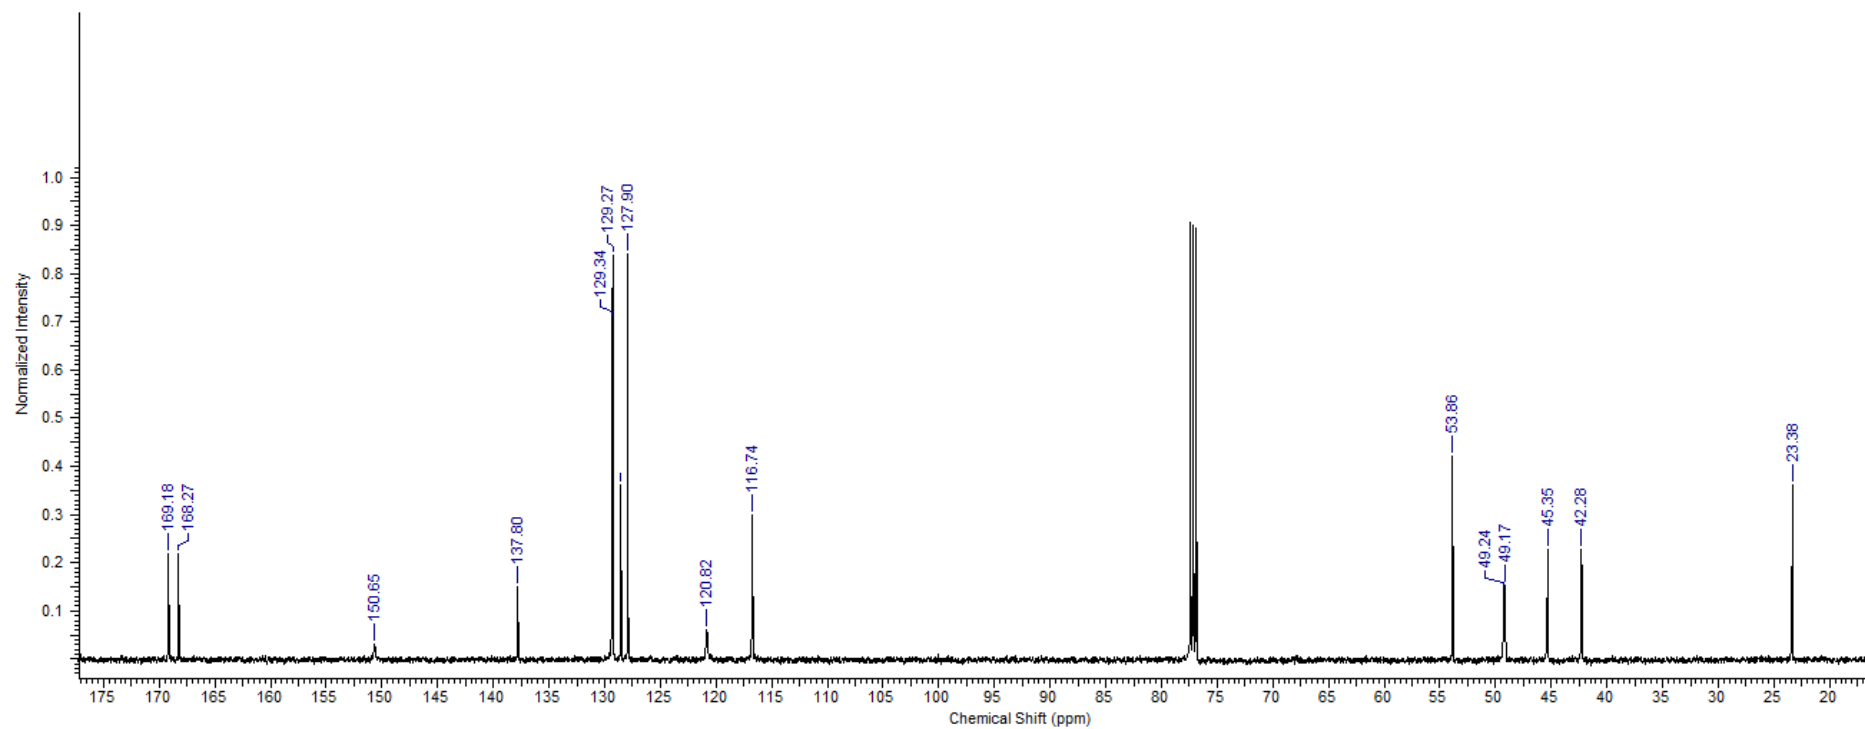

## Supporting Information

### *N*-(2-(4-(2-chlorophenyl)piperazin-1-yl)-2-oxo-1-phenylethyl)acetamide (46) – $^1\text{H}$ NMR

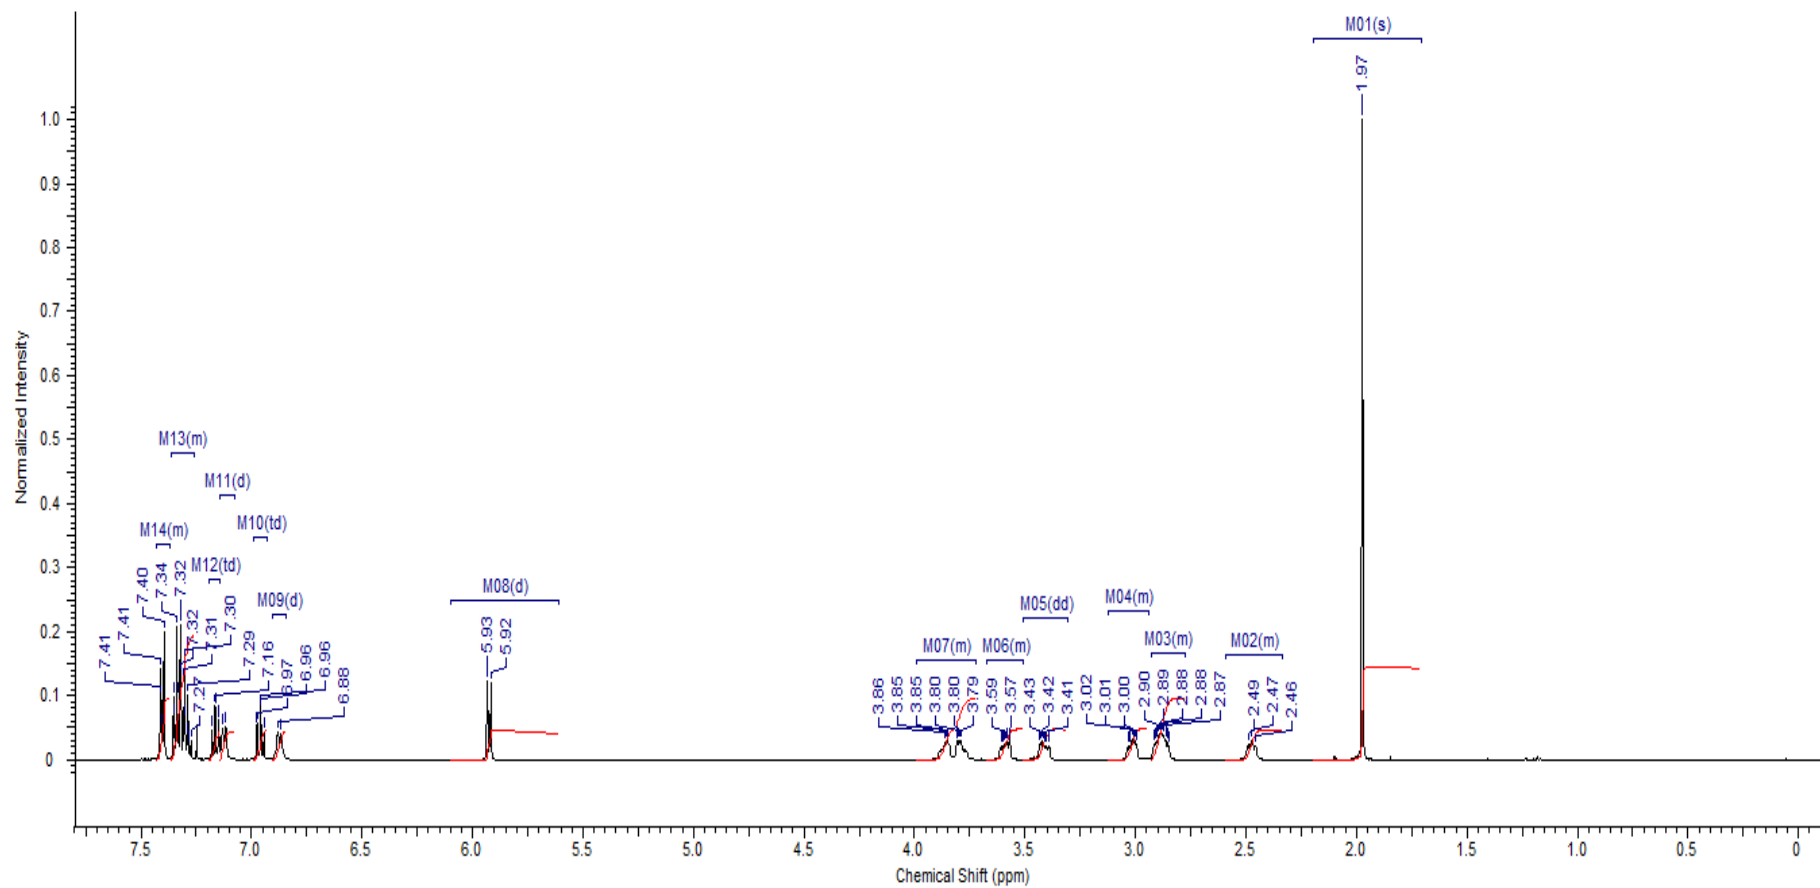

## Supporting Information

### *N*-(2-(4-(2-chlorophenyl)piperazin-1-yl)-2-oxo-1-phenylethyl)acetamide (46) – $^{13}\text{C}$ NMR

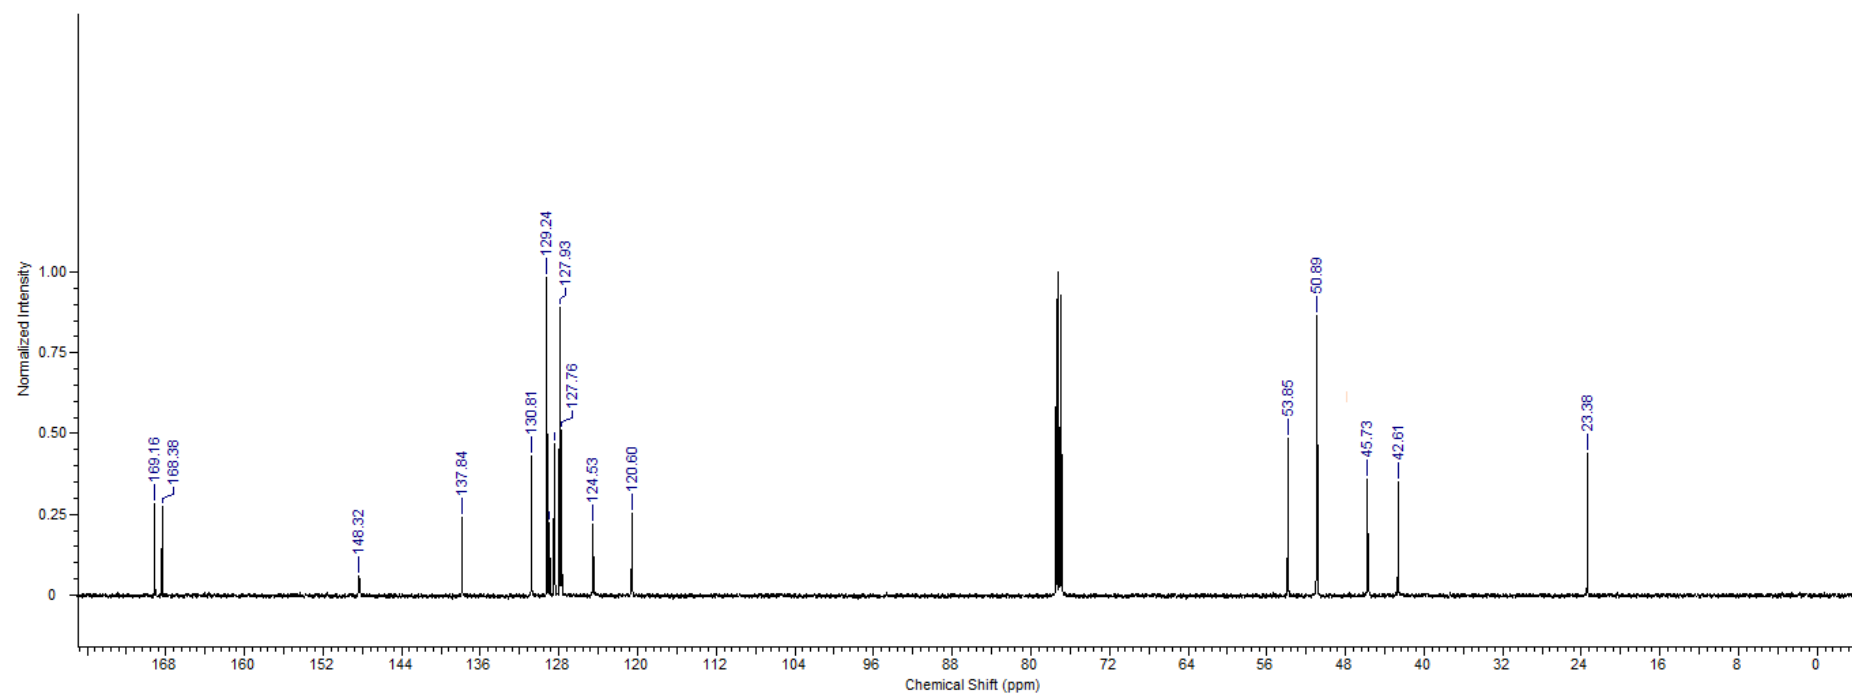

## Supporting Information

### *N*-(2-(4-(3-chlorophenyl)piperazin-1-yl)-2-oxo-1-phenylethyl)acetamide (47) – $^1\text{H}$ NMR

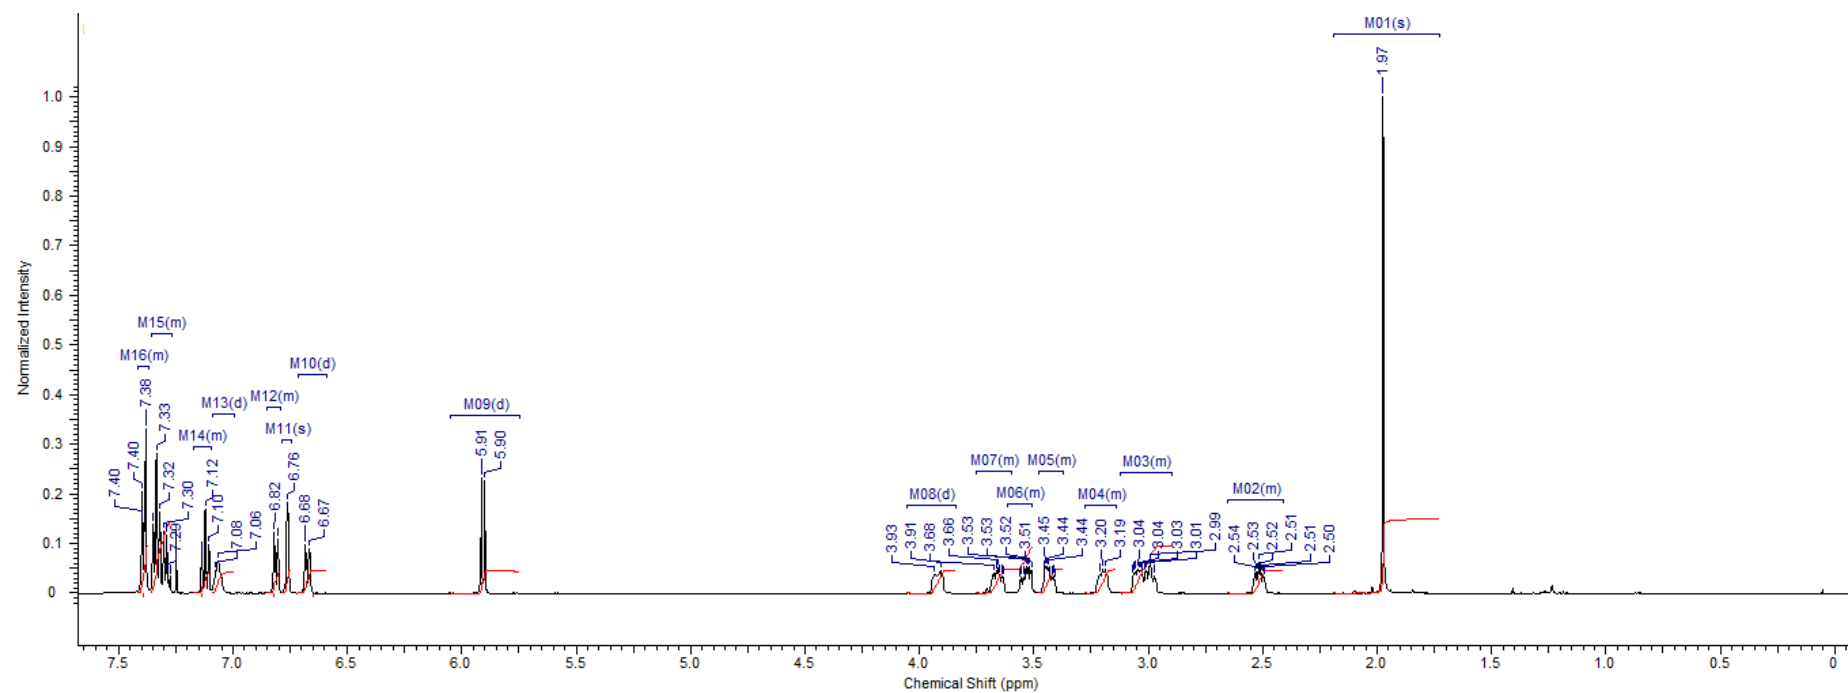

## Supporting Information

### *N*-(2-(4-(3-chlorophenyl)piperazin-1-yl)-2-oxo-1-phenylethyl)acetamide (47) – $^{13}\text{C}$ NMR

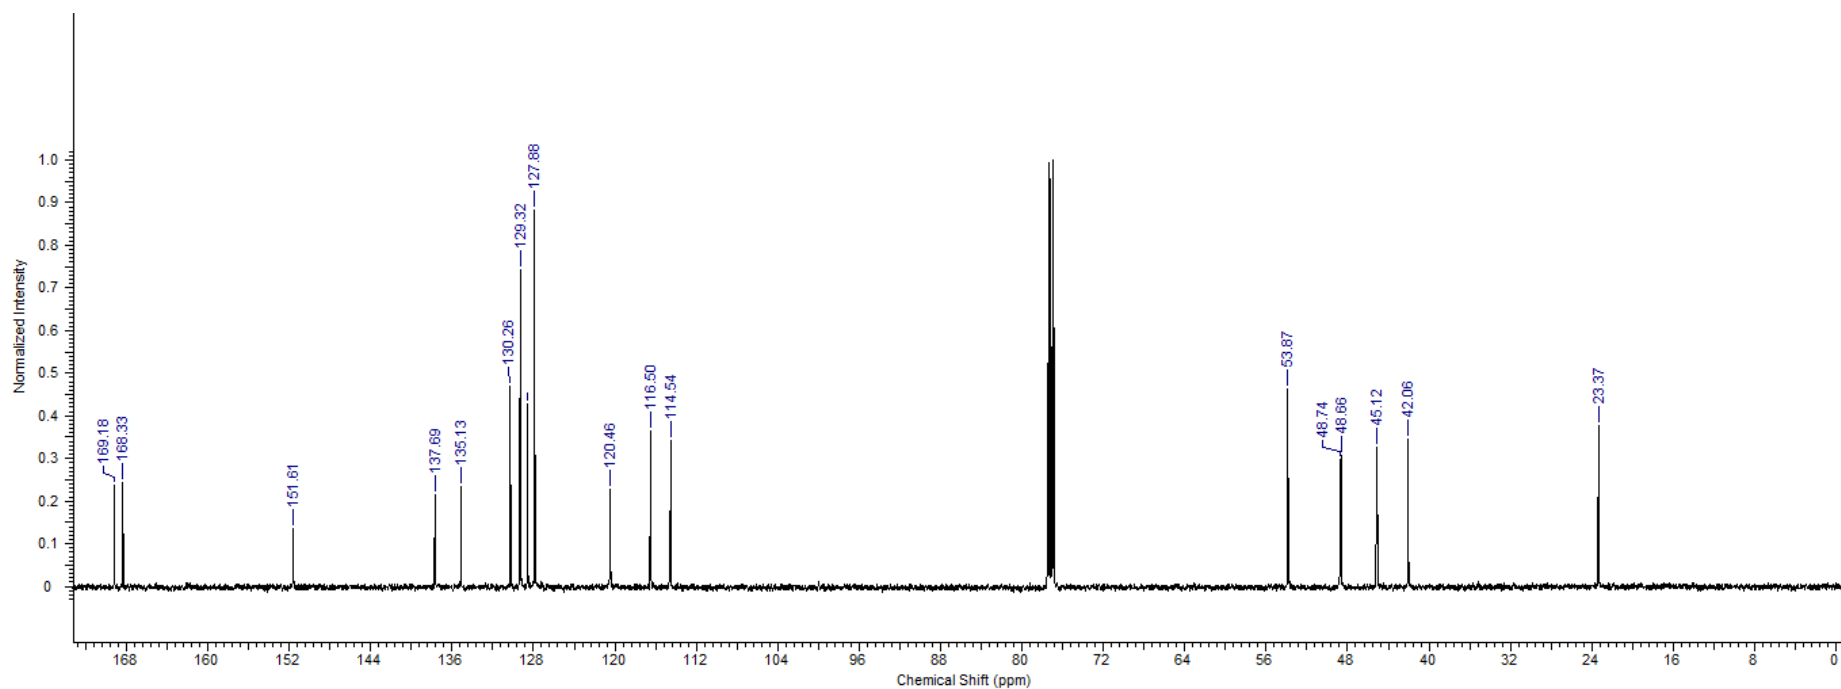

## Supporting Information

### *N*-(2-(4-(4-chlorophenyl)piperazin-1-yl)-2-oxo-1-phenylethyl)acetamide (48) – $^1\text{H}$ NMR

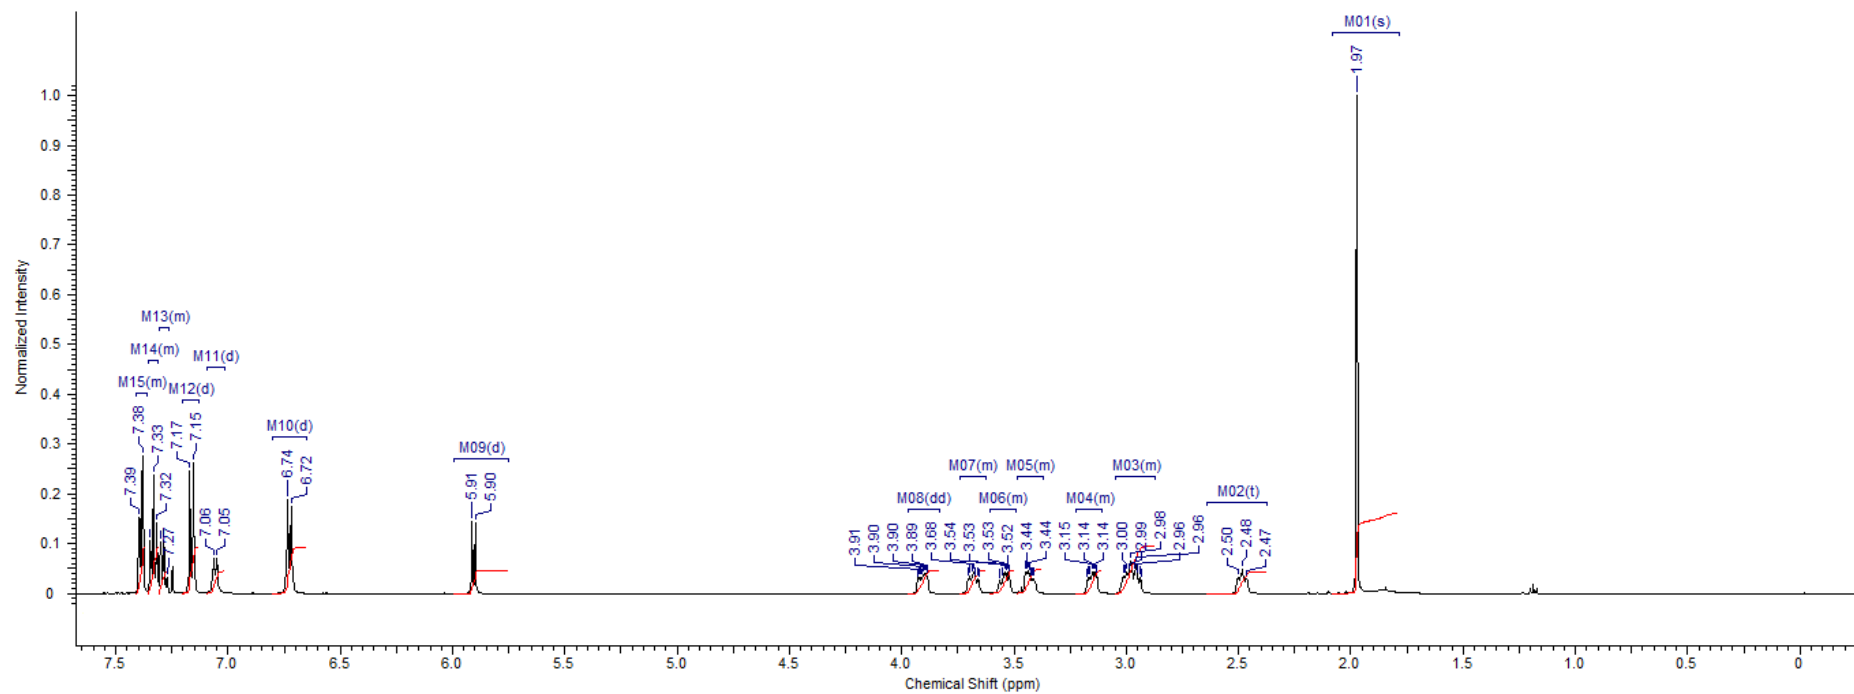



## Supporting Information

### *N*-(2-(4-(4-chlorophenyl)piperazin-1-yl)-2-oxo-1-phenylethyl)acetamide (48) – $^{13}\text{C}$ NMR

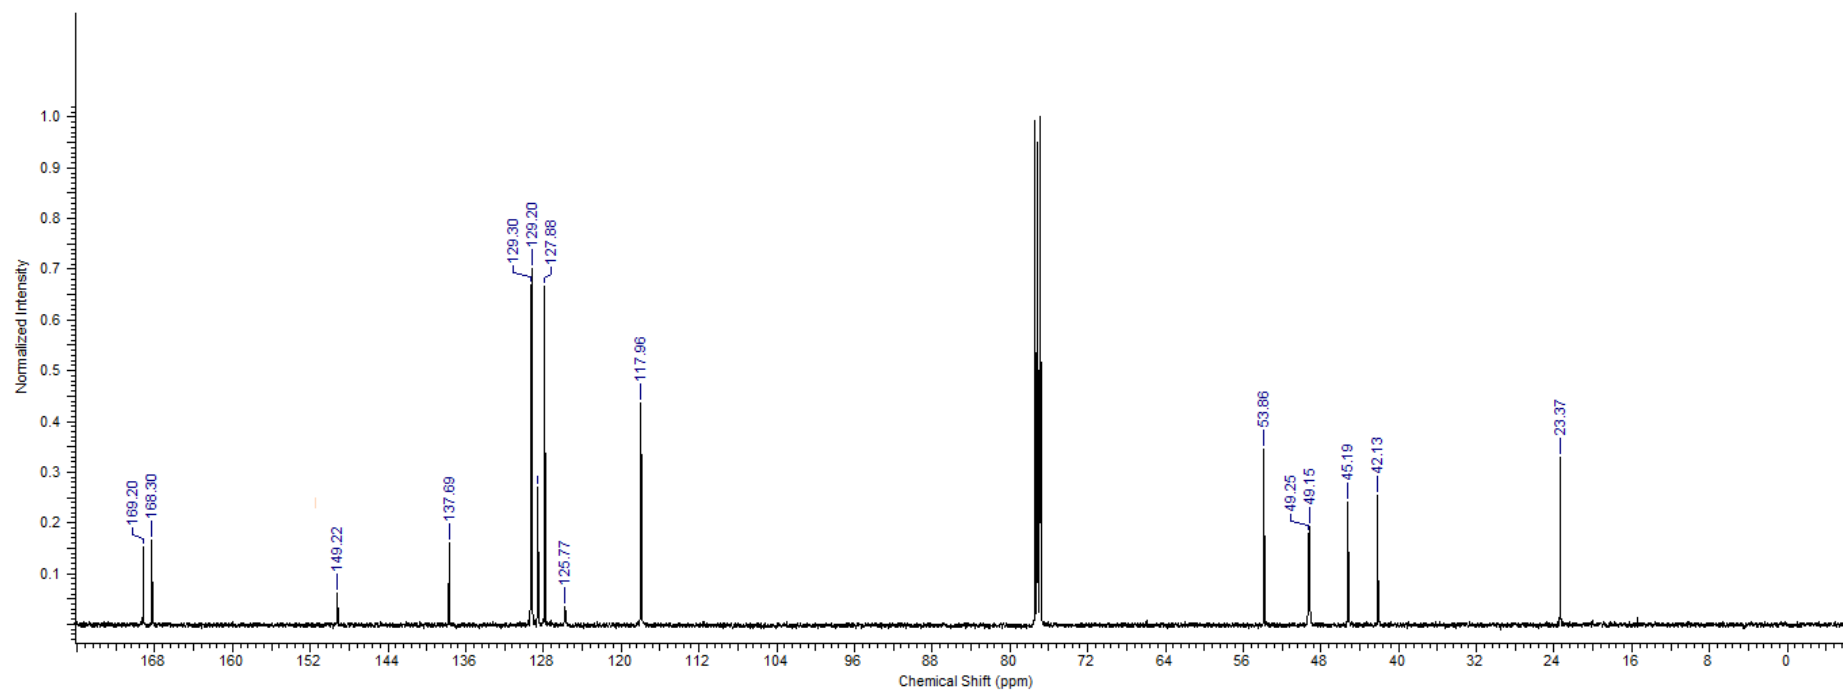

## Supporting Information

### *N*-(2-(4-(3,4-dichlorophenyl)piperazin-1-yl)-2-oxo-1-phenylethyl)acetamide (49) – $^1\text{H}$ NMR

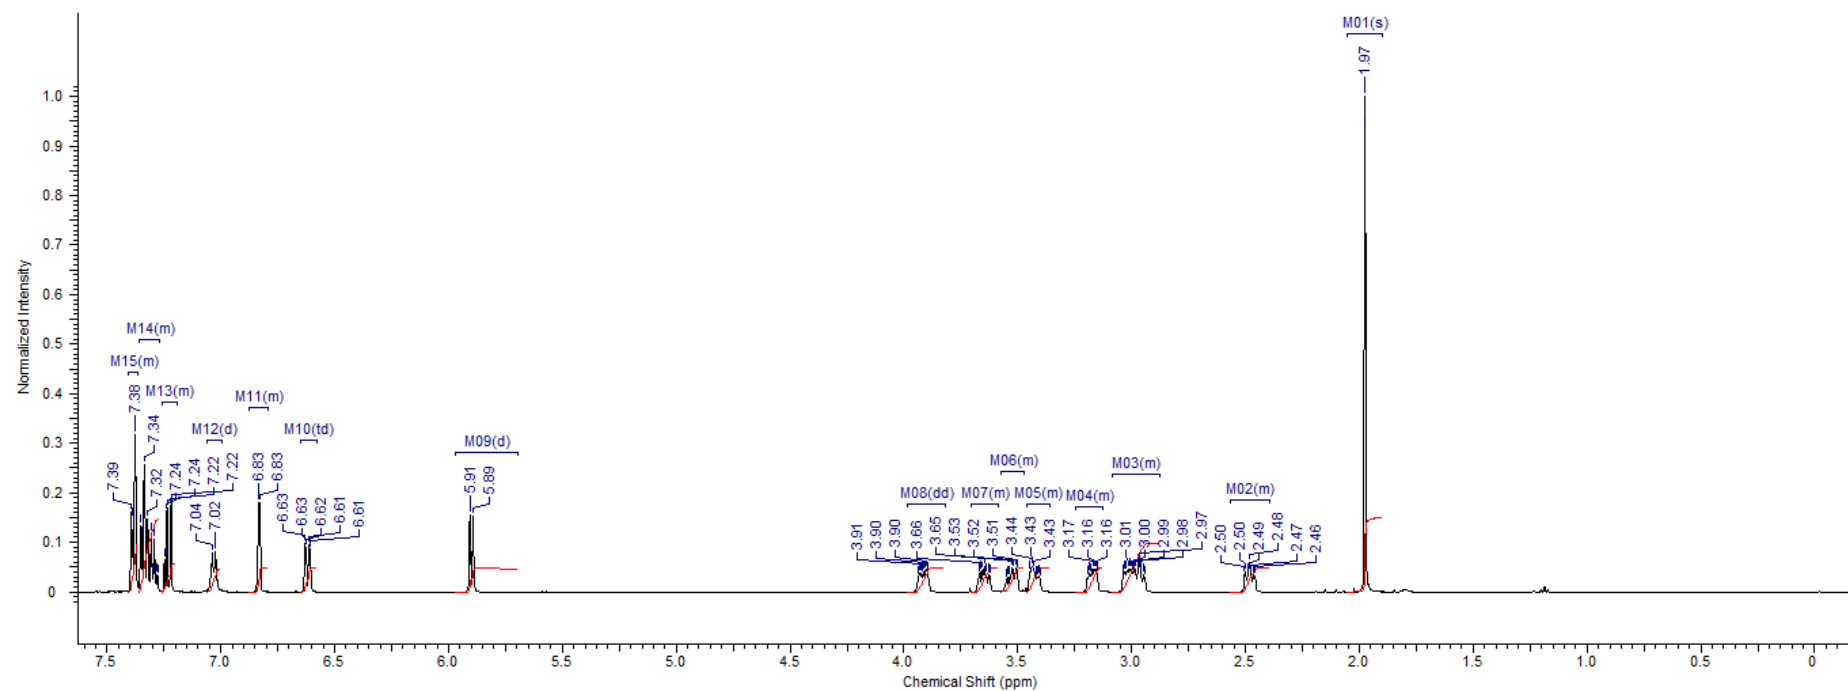

## Supporting Information

### *N*-(2-(4-(3,4-dichlorophenyl)piperazin-1-yl)-2-oxo-1-phenylethyl)acetamide (49) – $^{13}\text{C}$ NMR

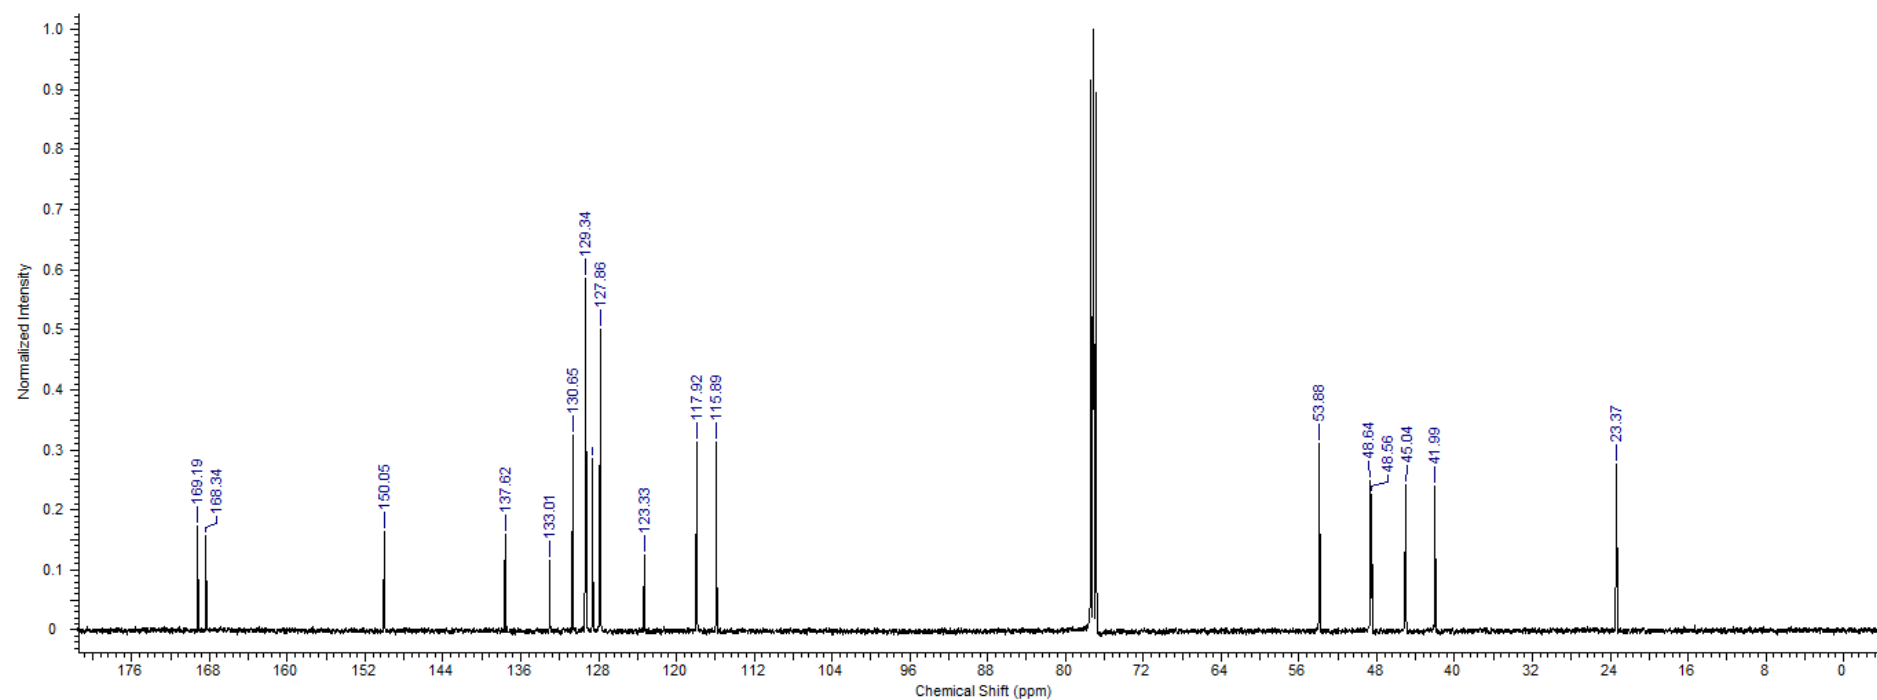

## Supporting Information

### *N*-(2-(4-(3,5-dichlorophenyl)piperazin-1-yl)-2-oxo-1-phenylethyl)acetamide (50) – $^1\text{H}$ NMR

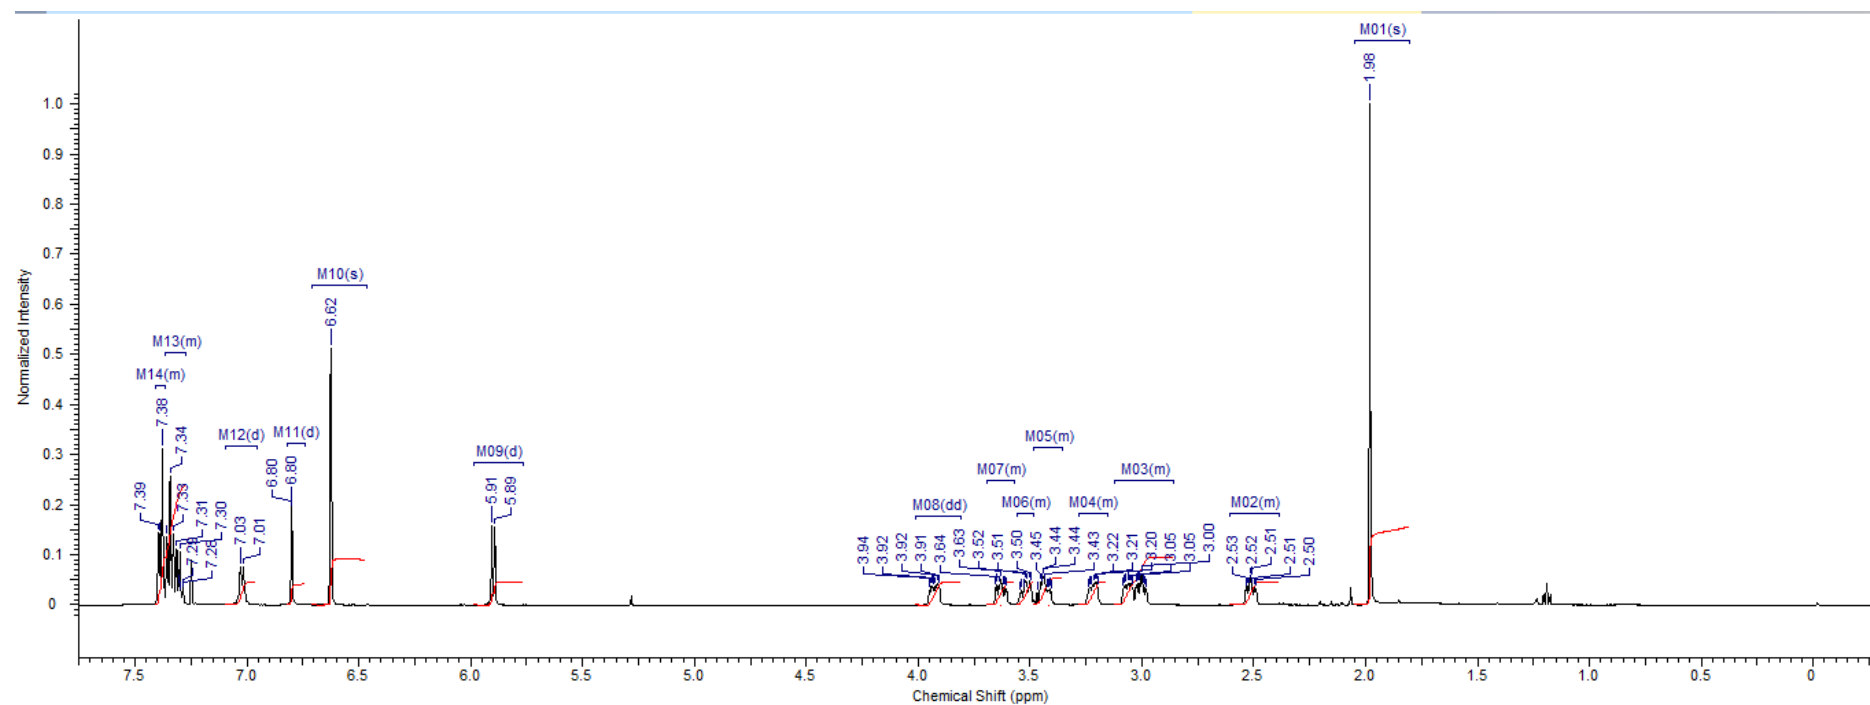

## Supporting Information

### *N*-(2-(4-(3,5-dichlorophenyl)piperazin-1-yl)-2-oxo-1-phenylethyl)acetamide (50) – $^{13}\text{C}$ NMR

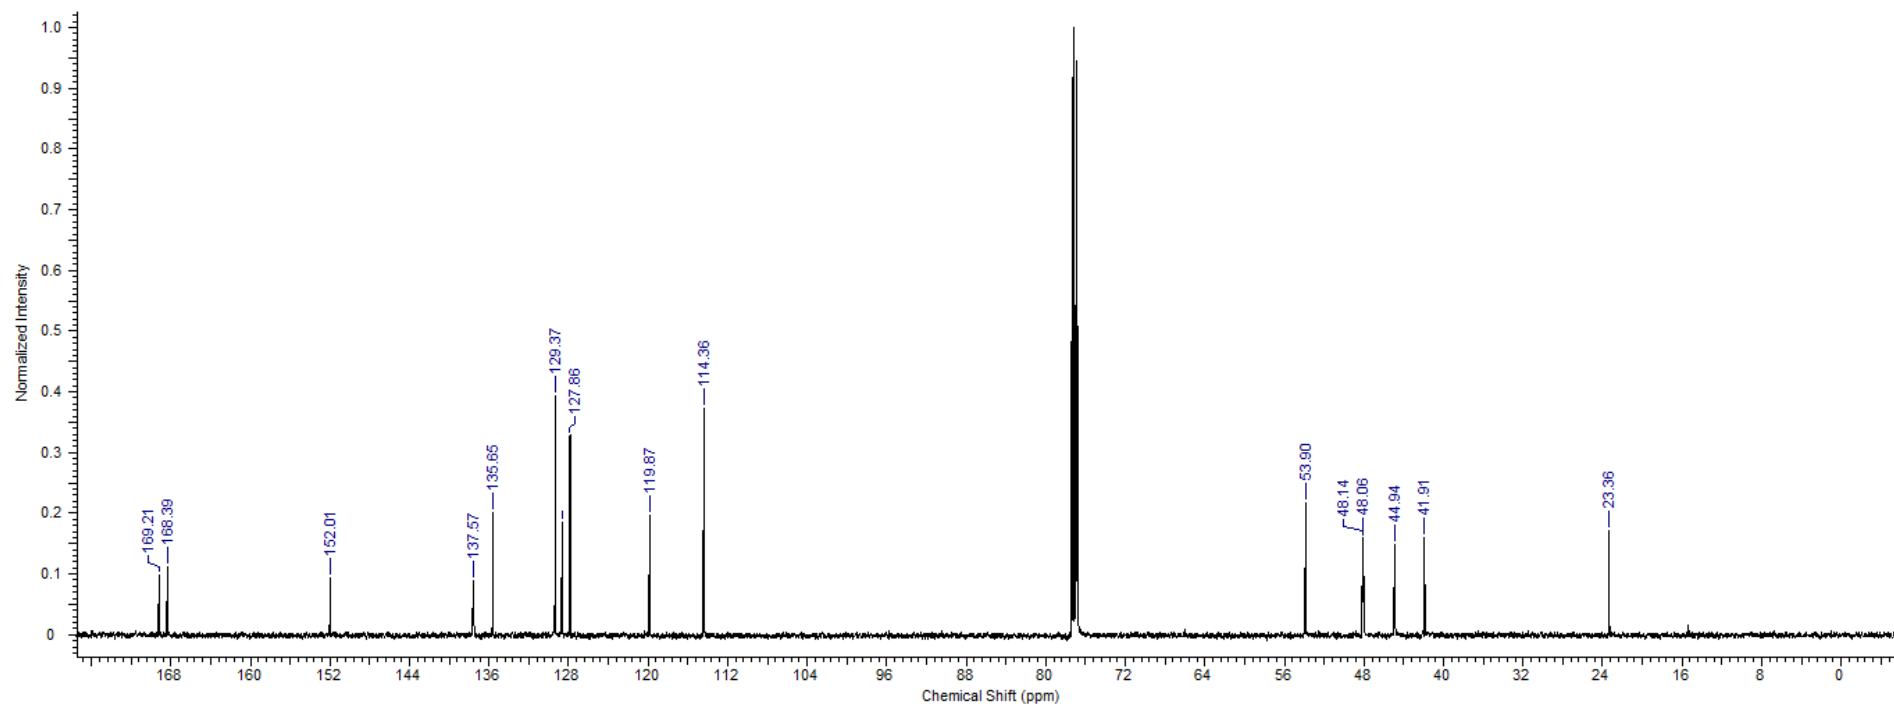

## Supporting Information

### *N*-(2-(4-(3-chloro-5-(trifluoromethyl)phenyl)piperazin-1-yl)-2-oxo-1-phenylethyl) acetamide (51) – $^1\text{H}$ NMR

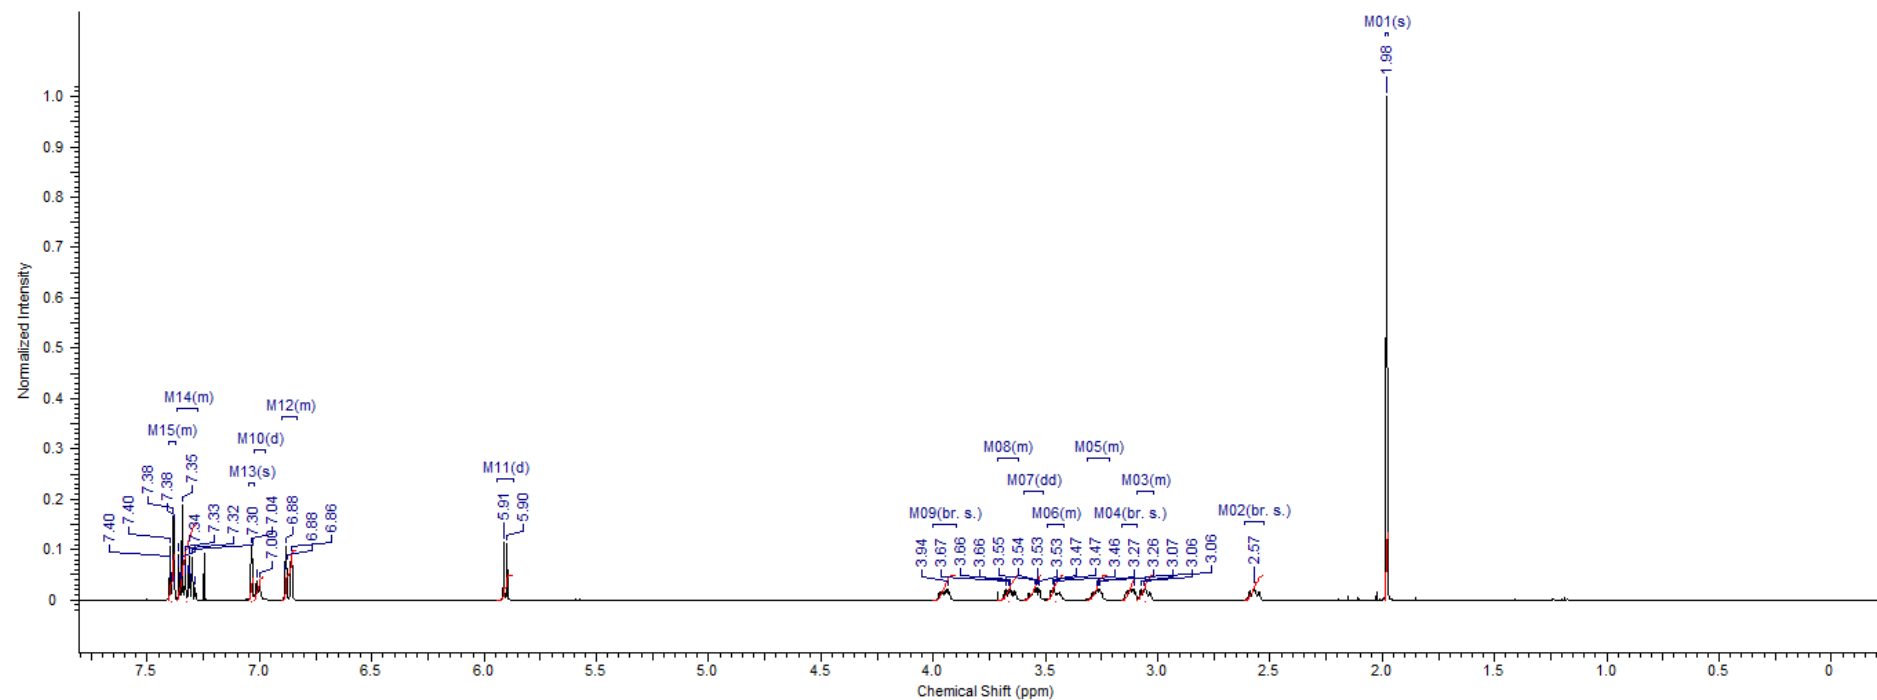

## Supporting Information

### *N*-(2-(4-(3-chloro-5-(trifluoromethyl)phenyl)piperazin-1-yl)-2-oxo-1-phenylethyl) acetamide (51) – $^{13}\text{C}$ NMR

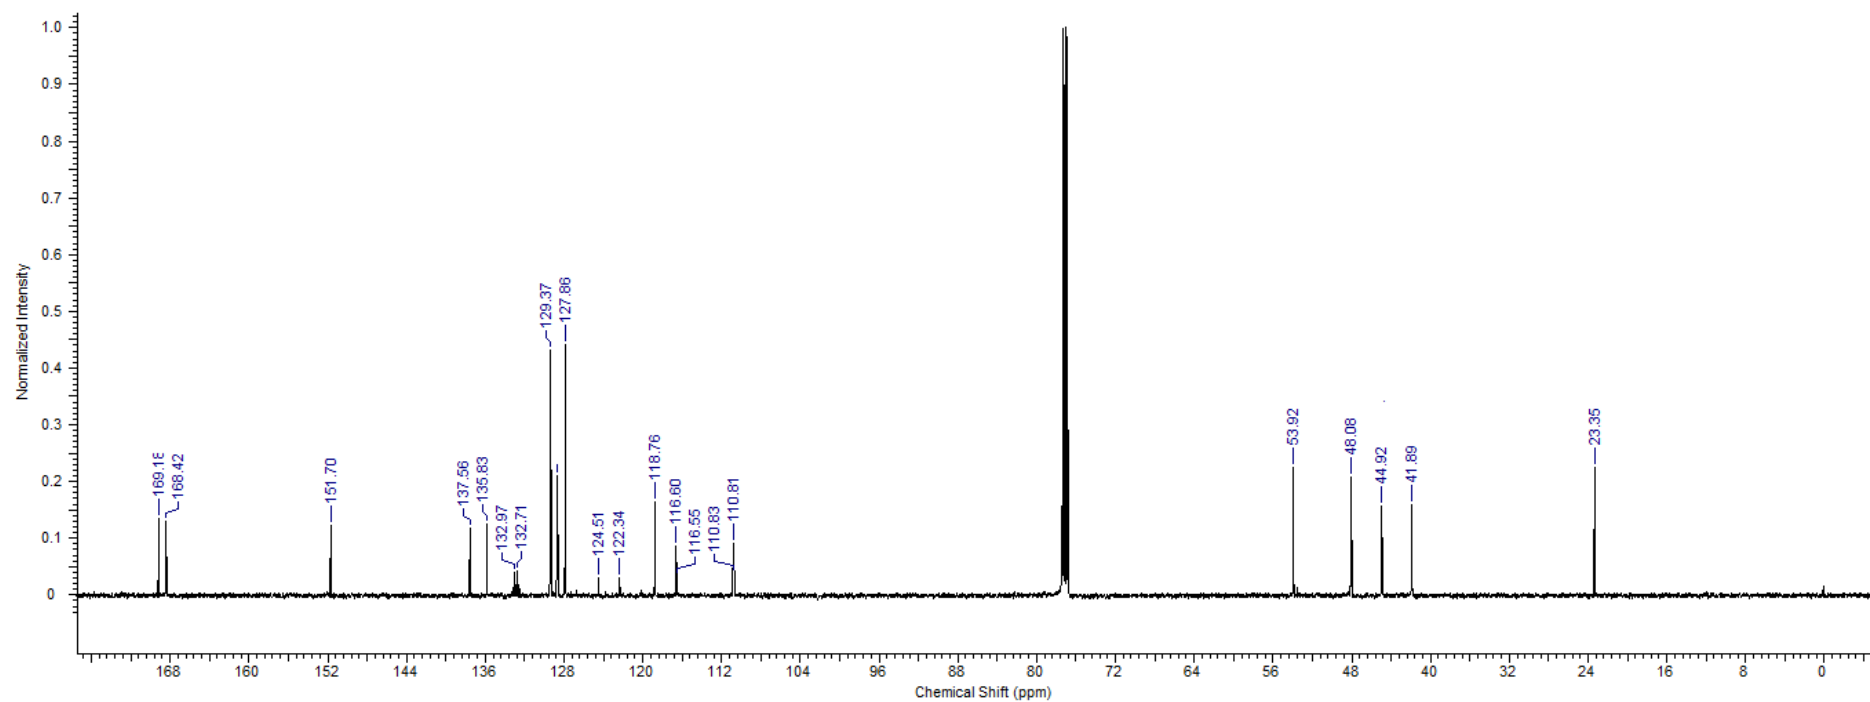

## Supporting Information

### *N*-(2-oxo-1-phenyl-2-(4-(2-(trifluoromethyl)phenyl)piperazin-1-yl)ethyl)acetamide (52) – $^1\text{H}$ NMR

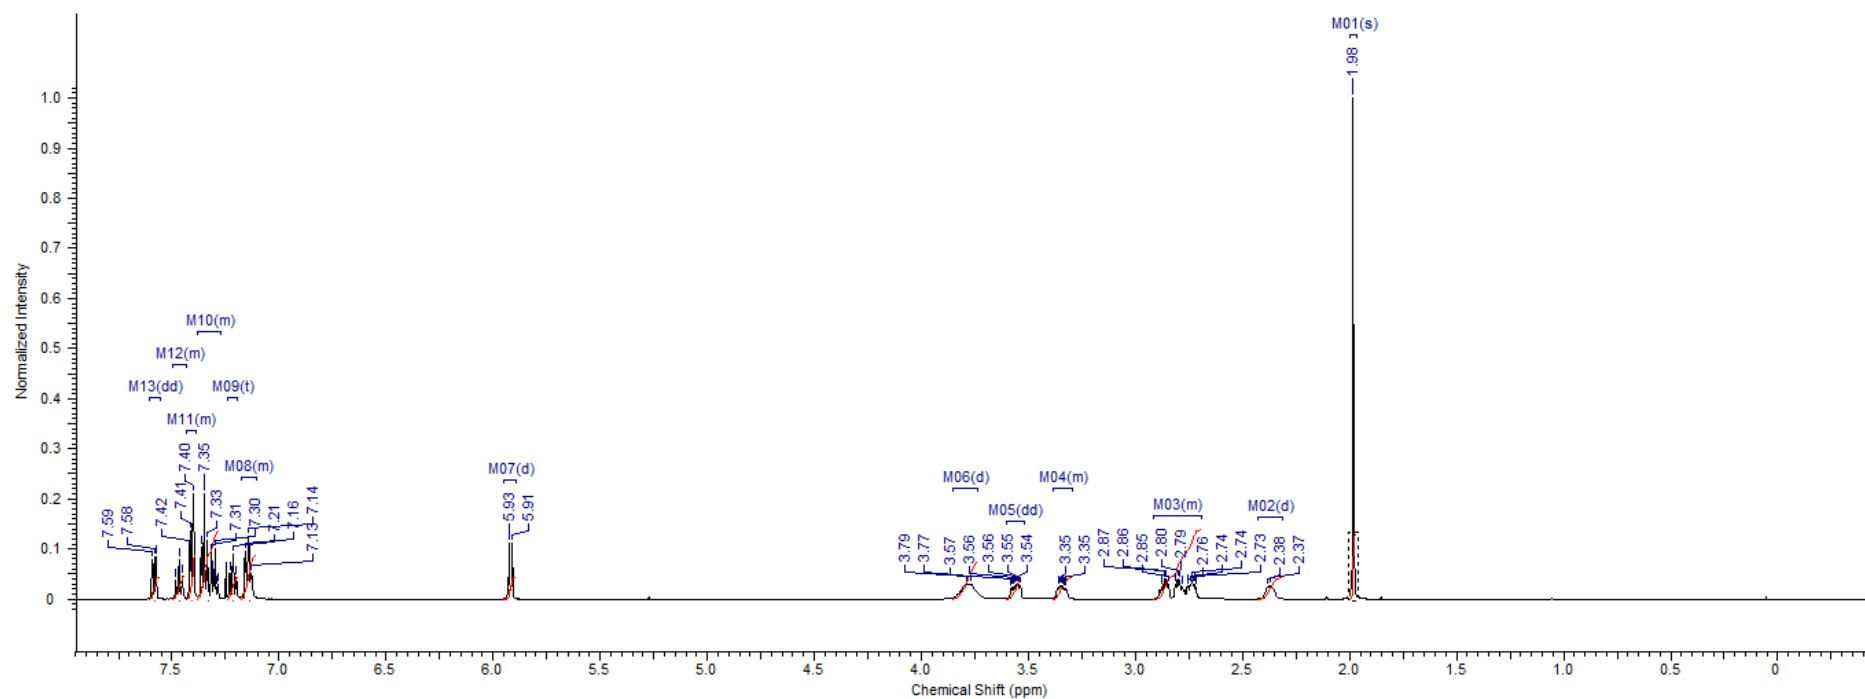



## Supporting Information

### *N*-(2-oxo-1-phenyl-2-(4-(2-(trifluoromethyl)phenyl)piperazin-1-yl)ethyl)acetamide (52) – $^{13}\text{C}$ NMR

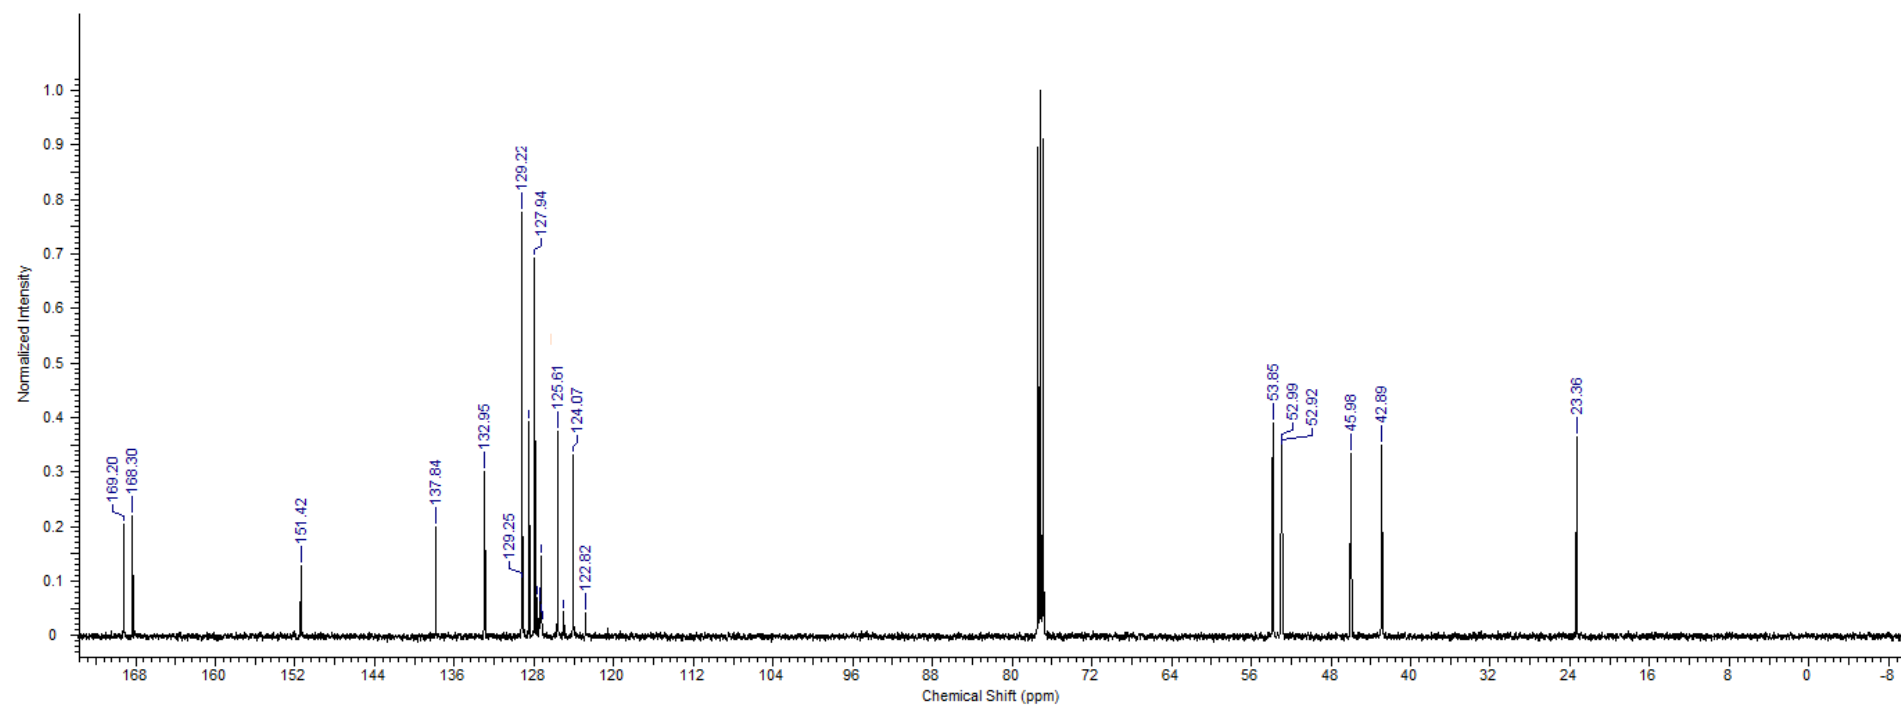

## Supporting Information

### *N*-(2-oxo-1-phenyl-2-(4-(3-(trifluoromethyl)phenyl)piperazin-1-yl)ethyl)acetamide (53) – $^1\text{H}$ NMR

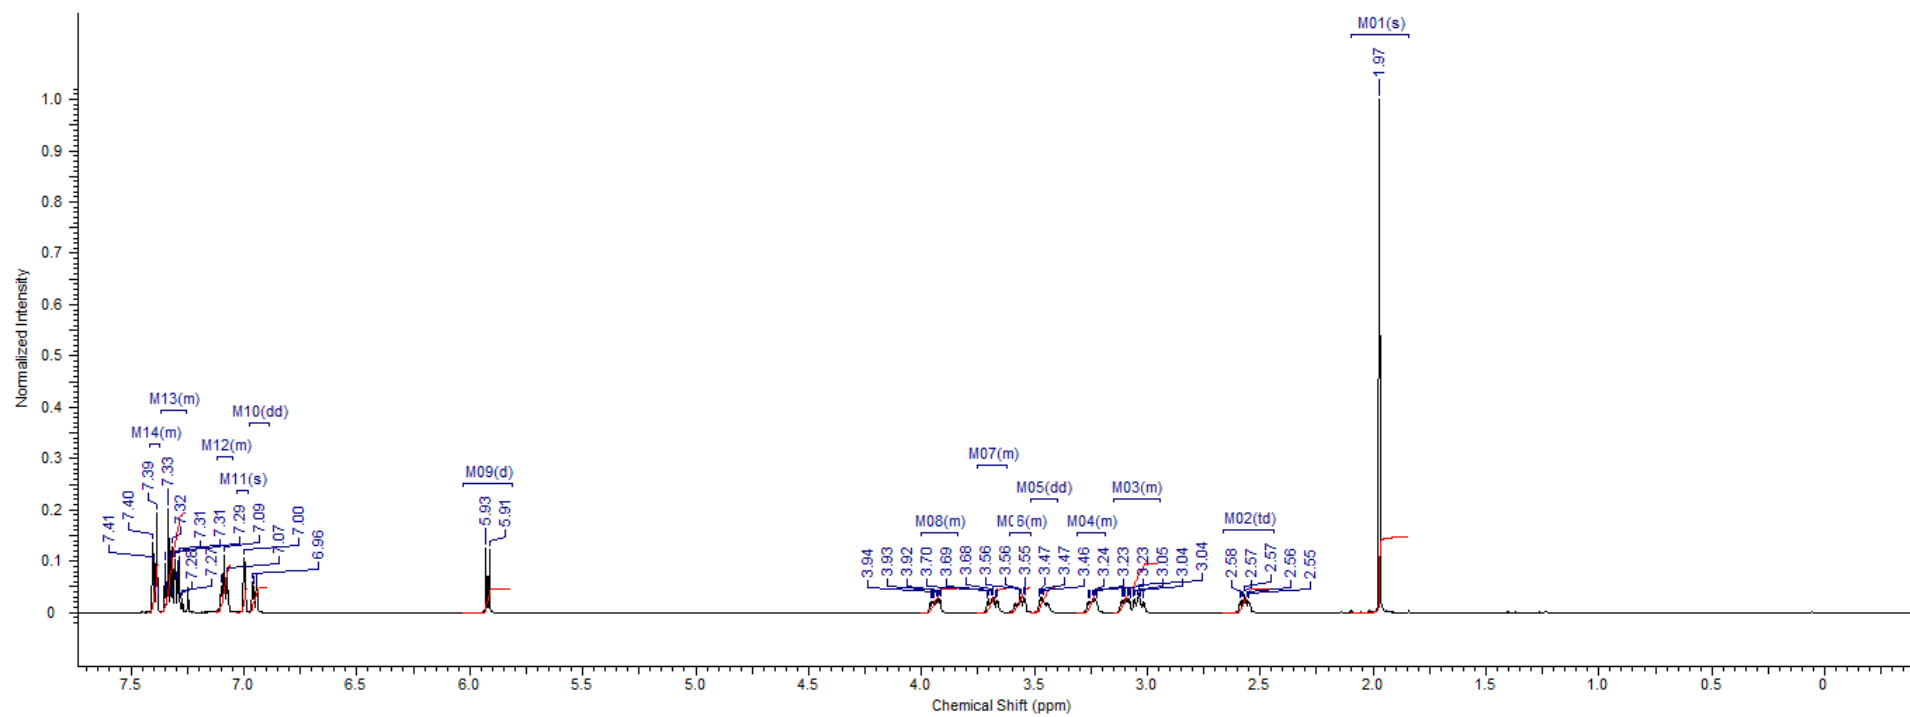

## Supporting Information

### *N*-(2-oxo-1-phenyl-2-(4-(3-(trifluoromethyl)phenyl)piperazin-1-yl)ethyl)acetamide (53) – $^{13}\text{C}$ NMR

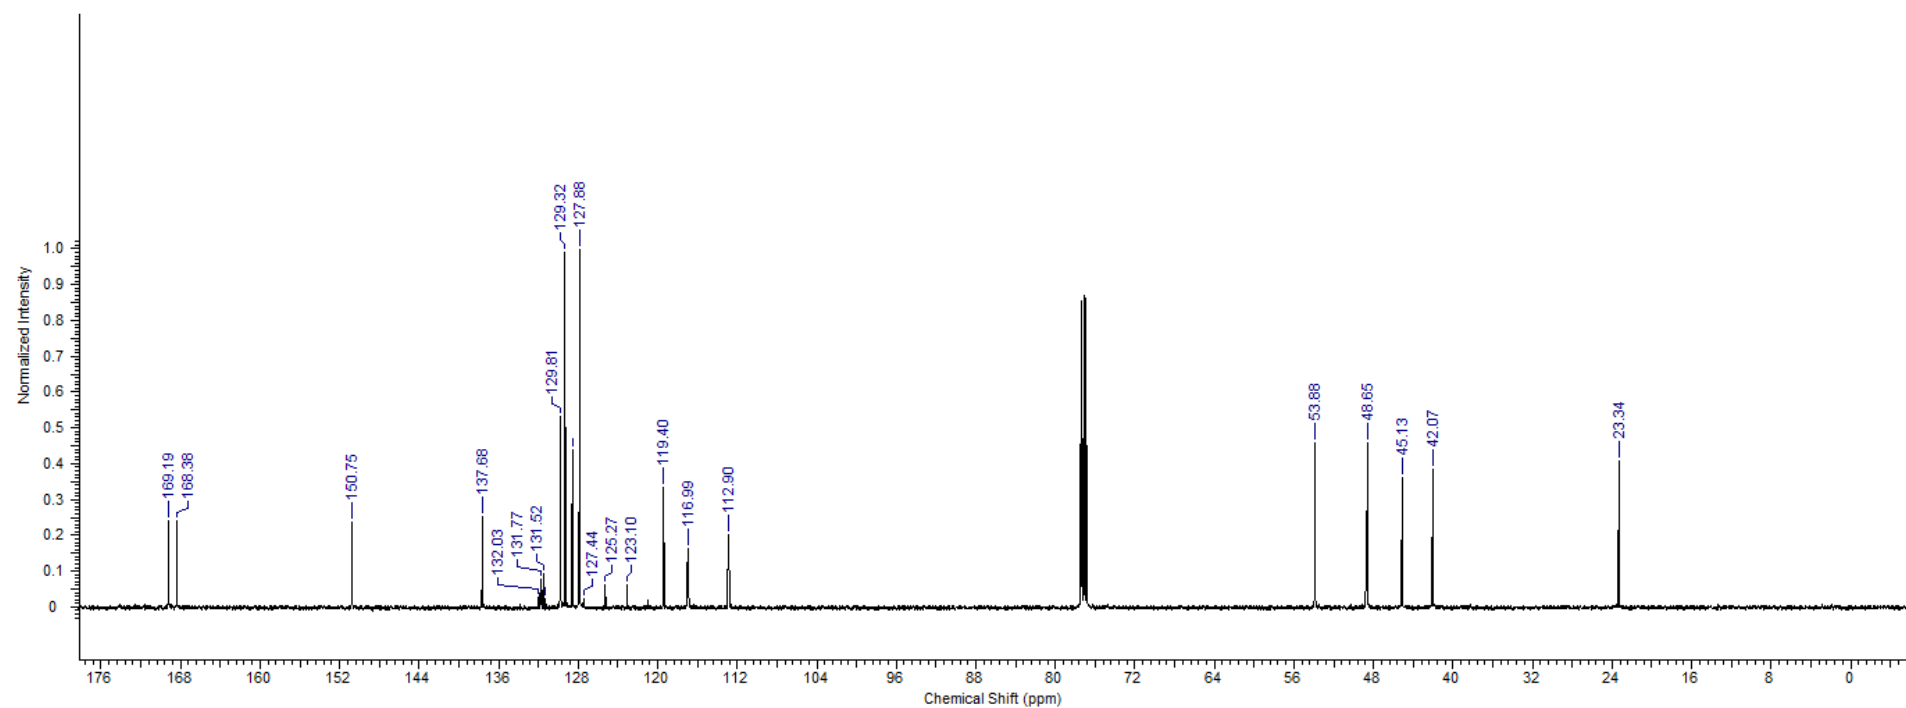

## Supporting Information

### *N*-(2-oxo-1-phenyl-2-(4-(4-(trifluoromethyl)phenyl)piperazin-1-yl)ethyl)acetamide (54) – $^1\text{H}$ NMR

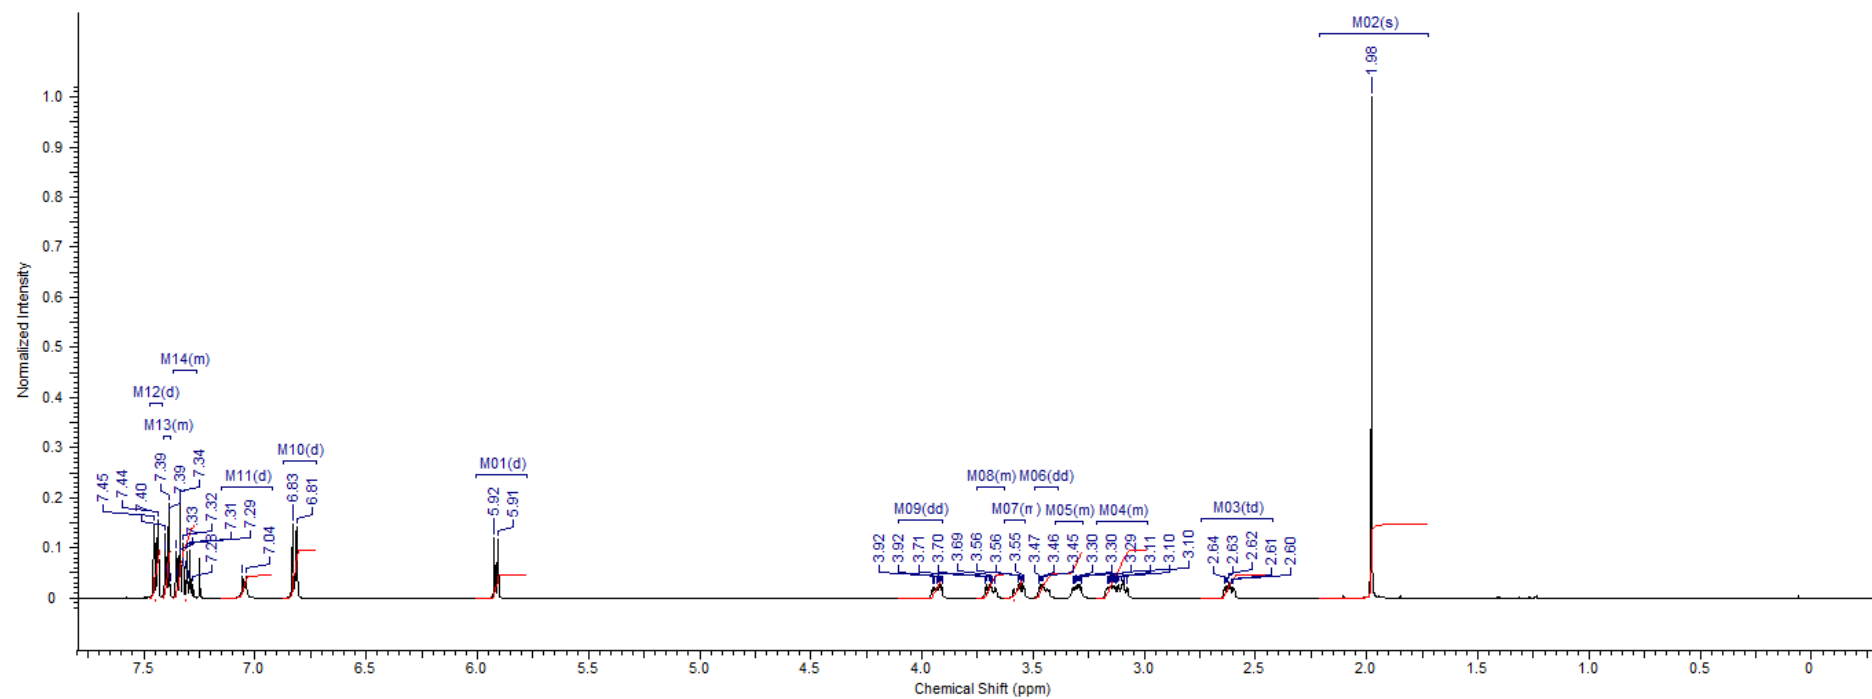

## Supporting Information

### *N*-(2-oxo-1-phenyl-2-(4-(4-(trifluoromethyl)phenyl)piperazin-1-yl)ethyl)acetamide (54) – $^{13}\text{C}$ NMR

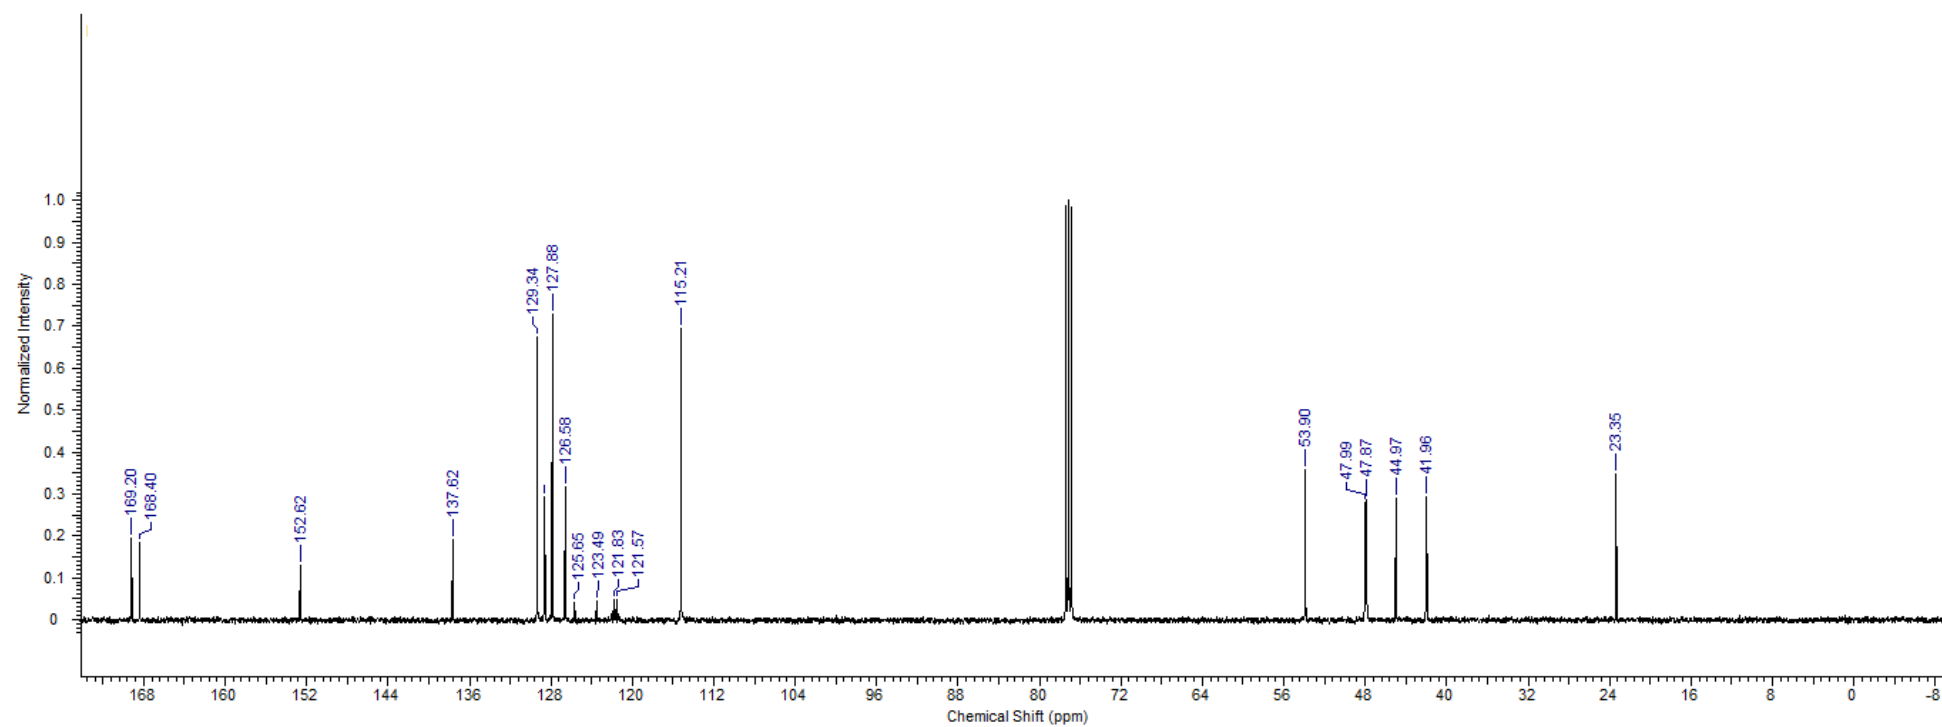

## Supporting Information

### *N*-(2-(4-(3,5-bis(trifluoromethyl)phenyl)piperazin-1-yl)-2-oxo-1-phenylethyl)acetamide (55) – $^1\text{H}$ NMR

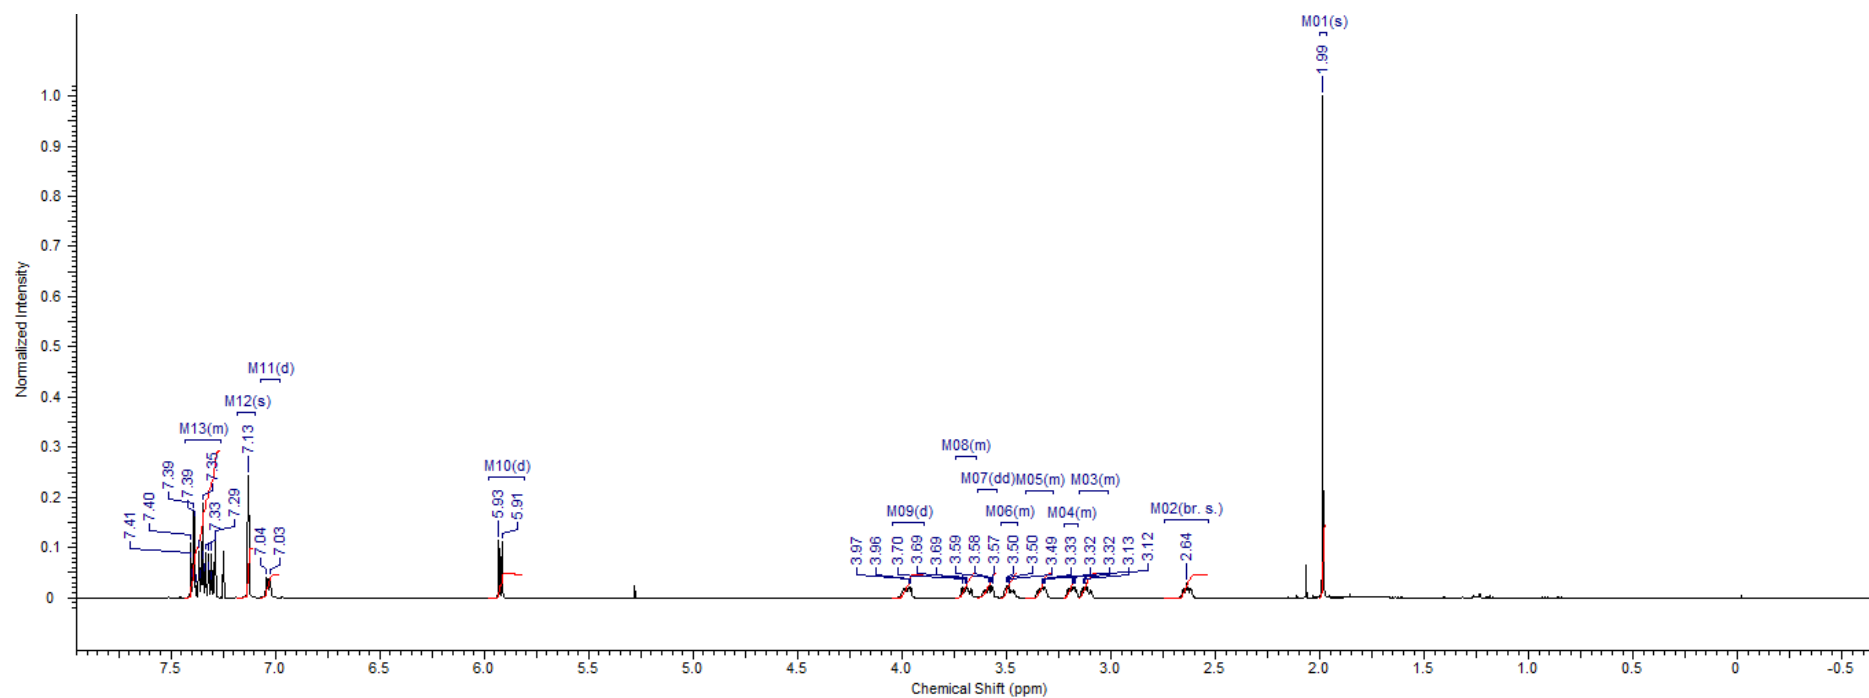

## Supporting Information

### *N*-(2-(4-(3,5-bis(trifluoromethyl)phenyl)piperazin-1-yl)-2-oxo-1-phenylethyl)acetamide (55) – $^{13}\text{C}$ NMR

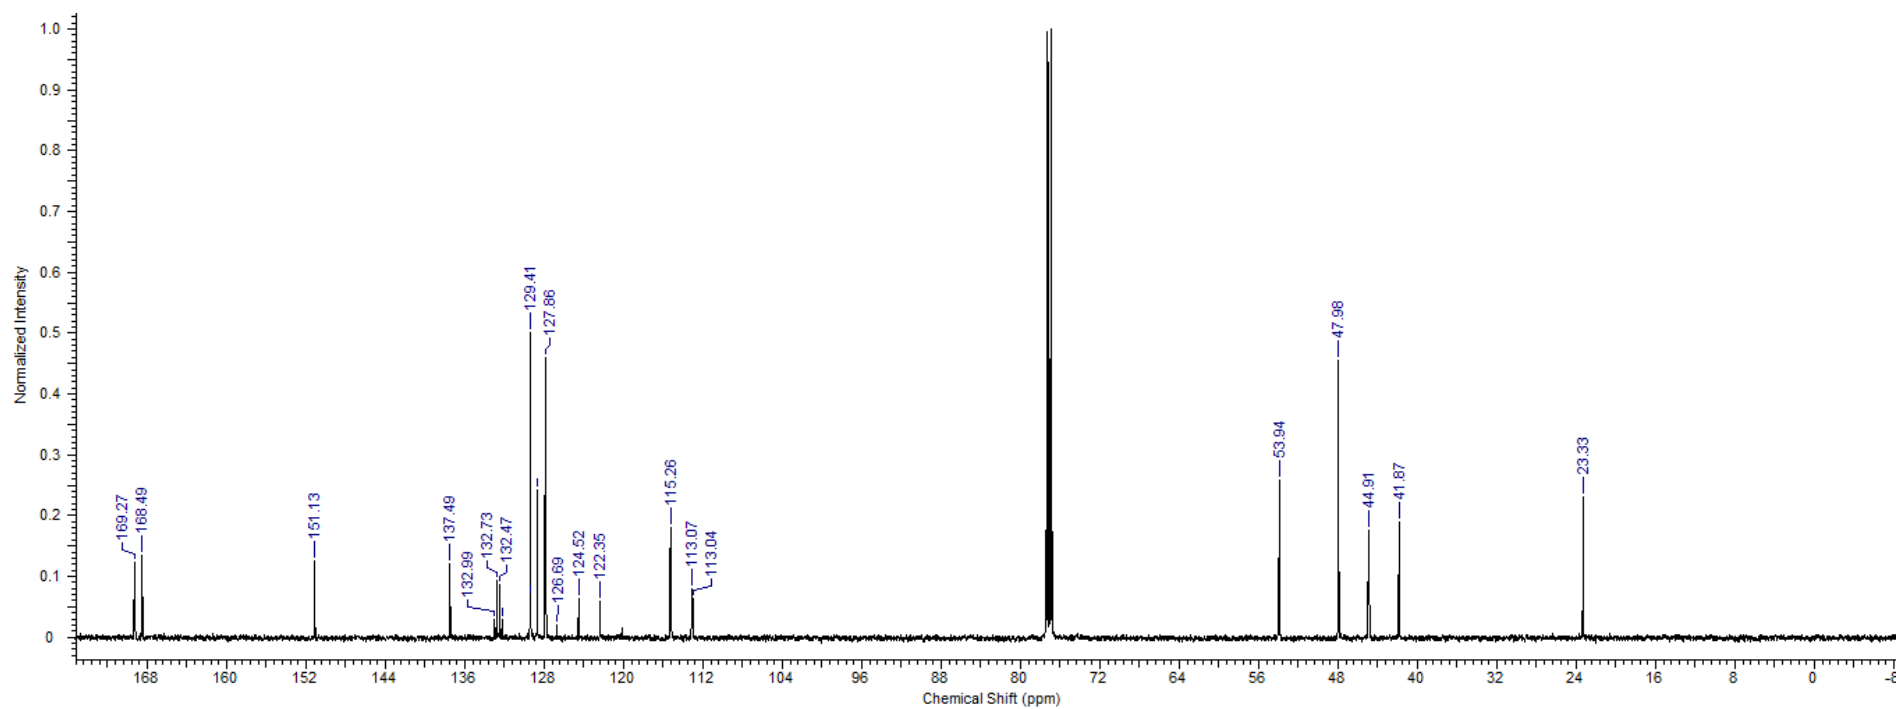

## Supporting Information

### *N*-(2-oxo-1-phenyl-2-(4-(*m*-tolyl)piperazin-1-yl)ethyl)acetamide (56) – $^1\text{H}$ NMR

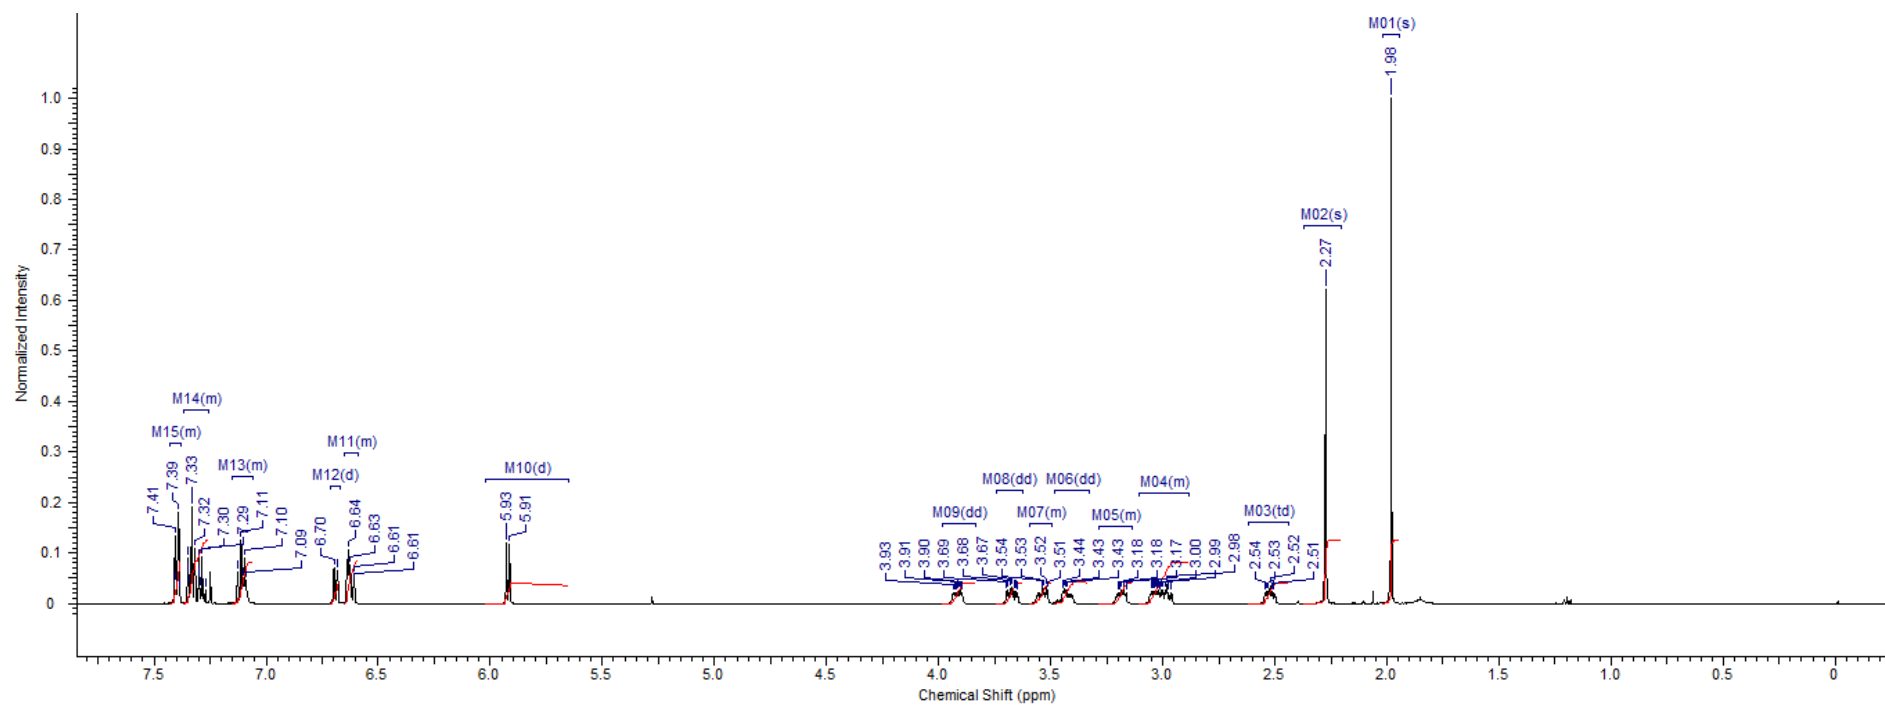



## Supporting Information

### *N*-(2-oxo-1-phenyl-2-(4-(*m*-tolyl)piperazin-1-yl)ethyl)acetamide (56) – $^{13}\text{C}$ NMR

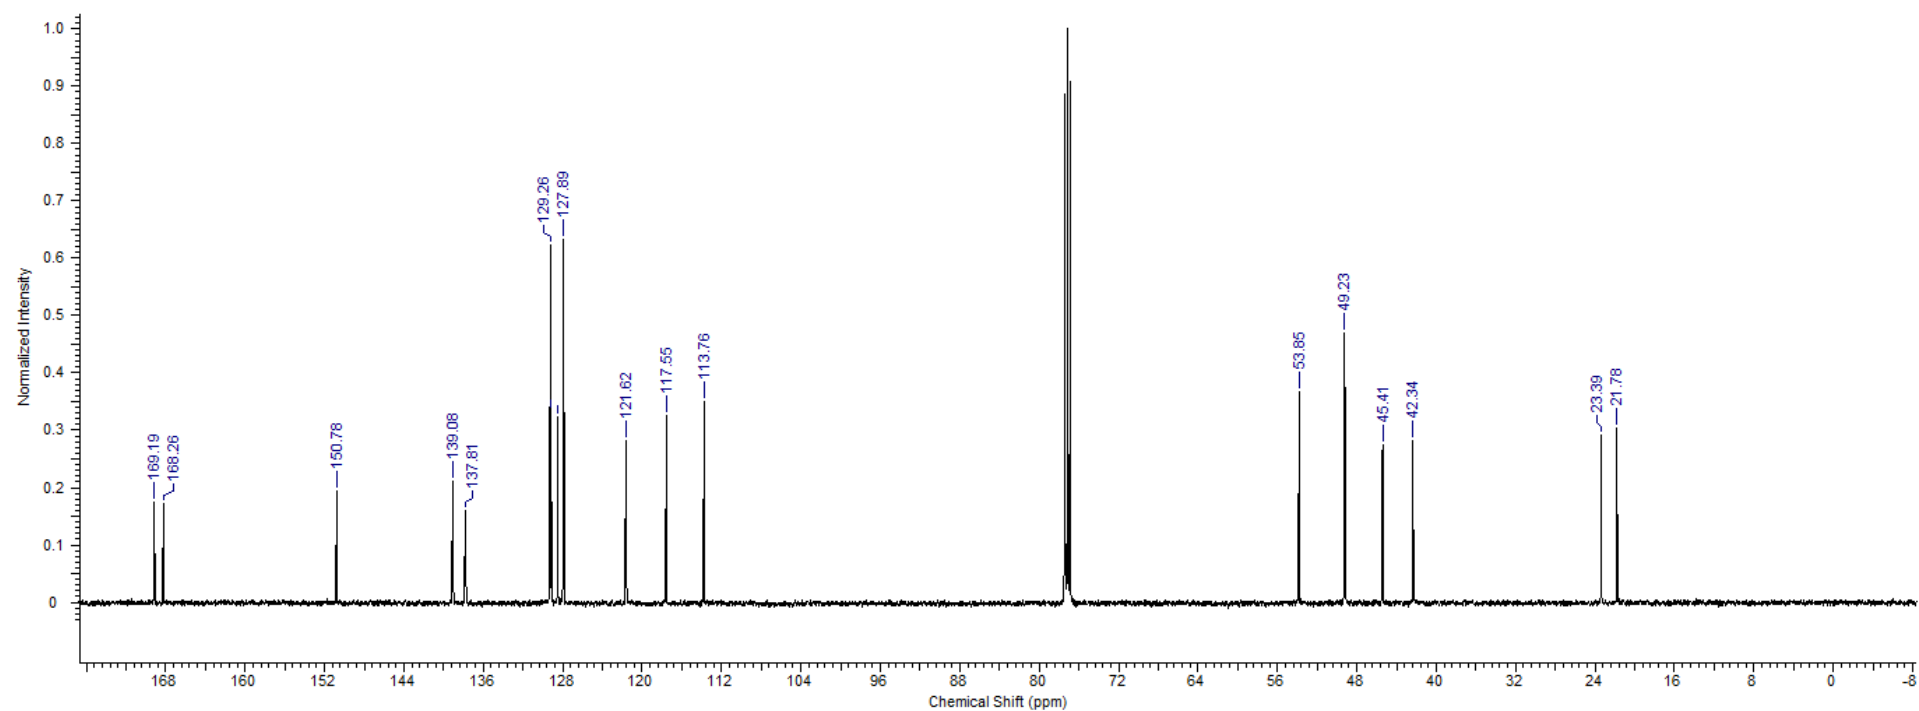

## Supporting Information

### *N*-(2-(4-(3-(difluoromethyl)phenyl)piperazin-1-yl)-2-oxo-1-phenylethyl)acetamide (57) – $^1\text{H}$ NMR

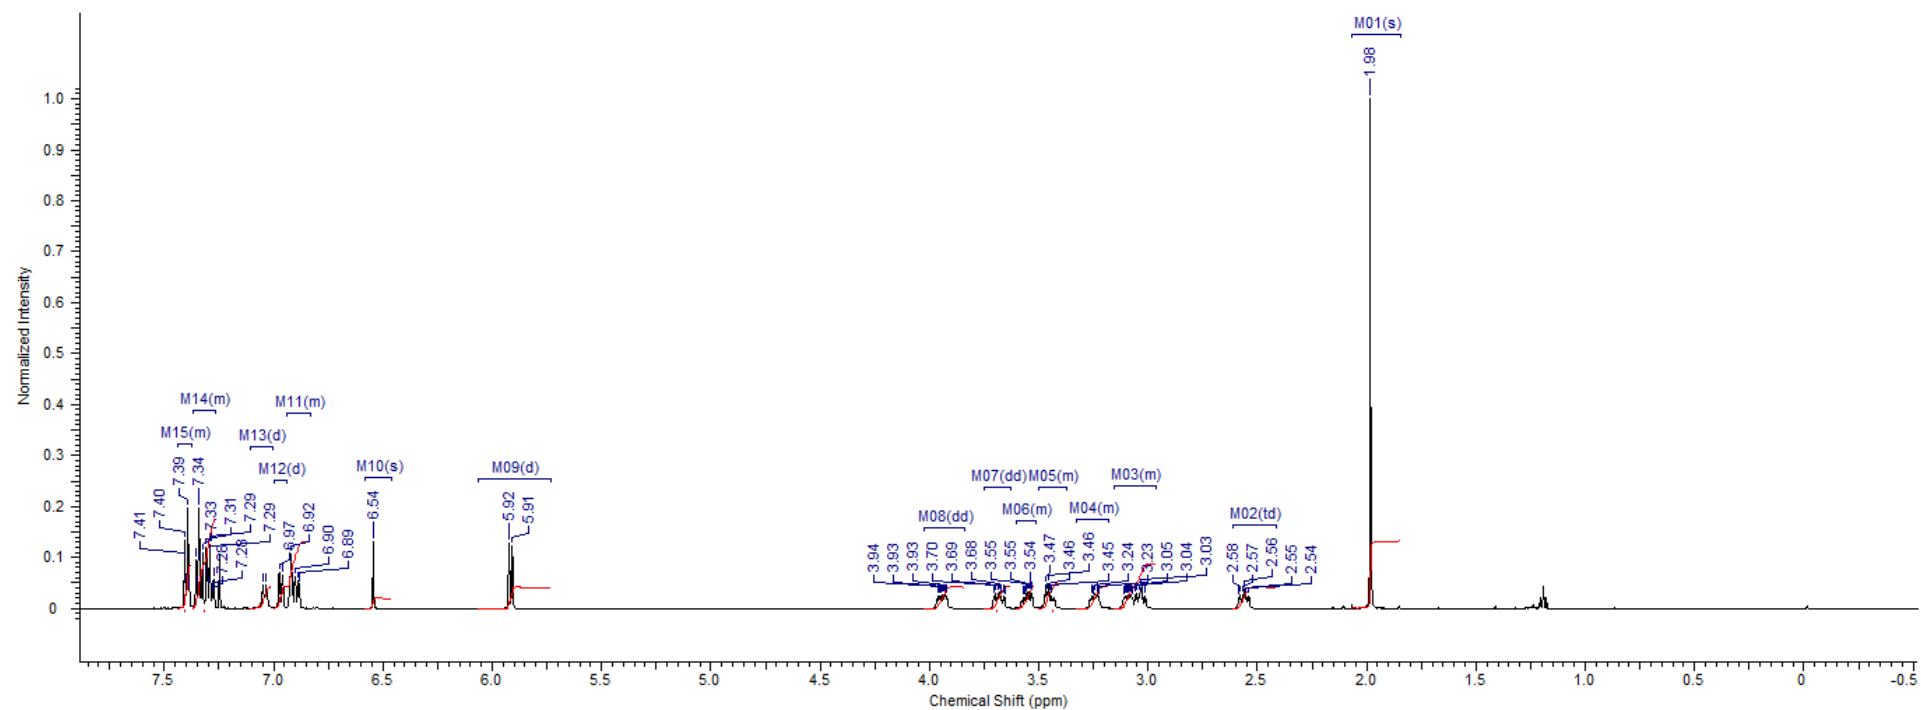

## Supporting Information

### *N*-(2-(4-(3-(difluoromethyl)phenyl)piperazin-1-yl)-2-oxo-1-phenylethyl)acetamide (57) – $^{13}\text{C}$ NMR

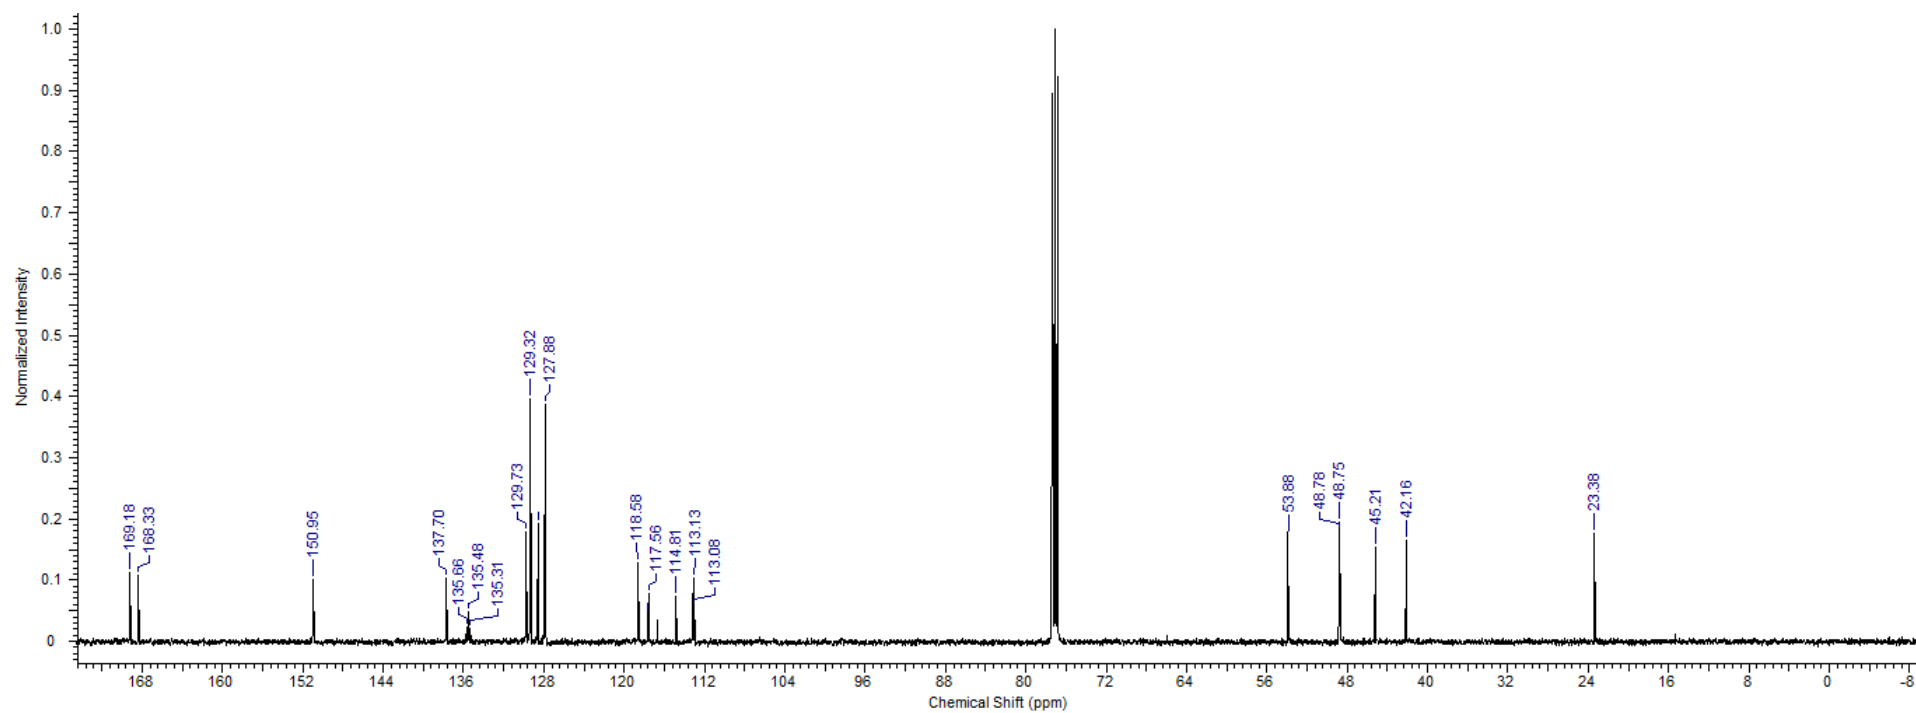

## Supporting Information

### *N*-(2-(4-([1,1'-biphenyl]-3-yl)piperazin-1-yl)-2-oxo-1-phenylethyl)acetamide (58) – $^1\text{H}$ NMR

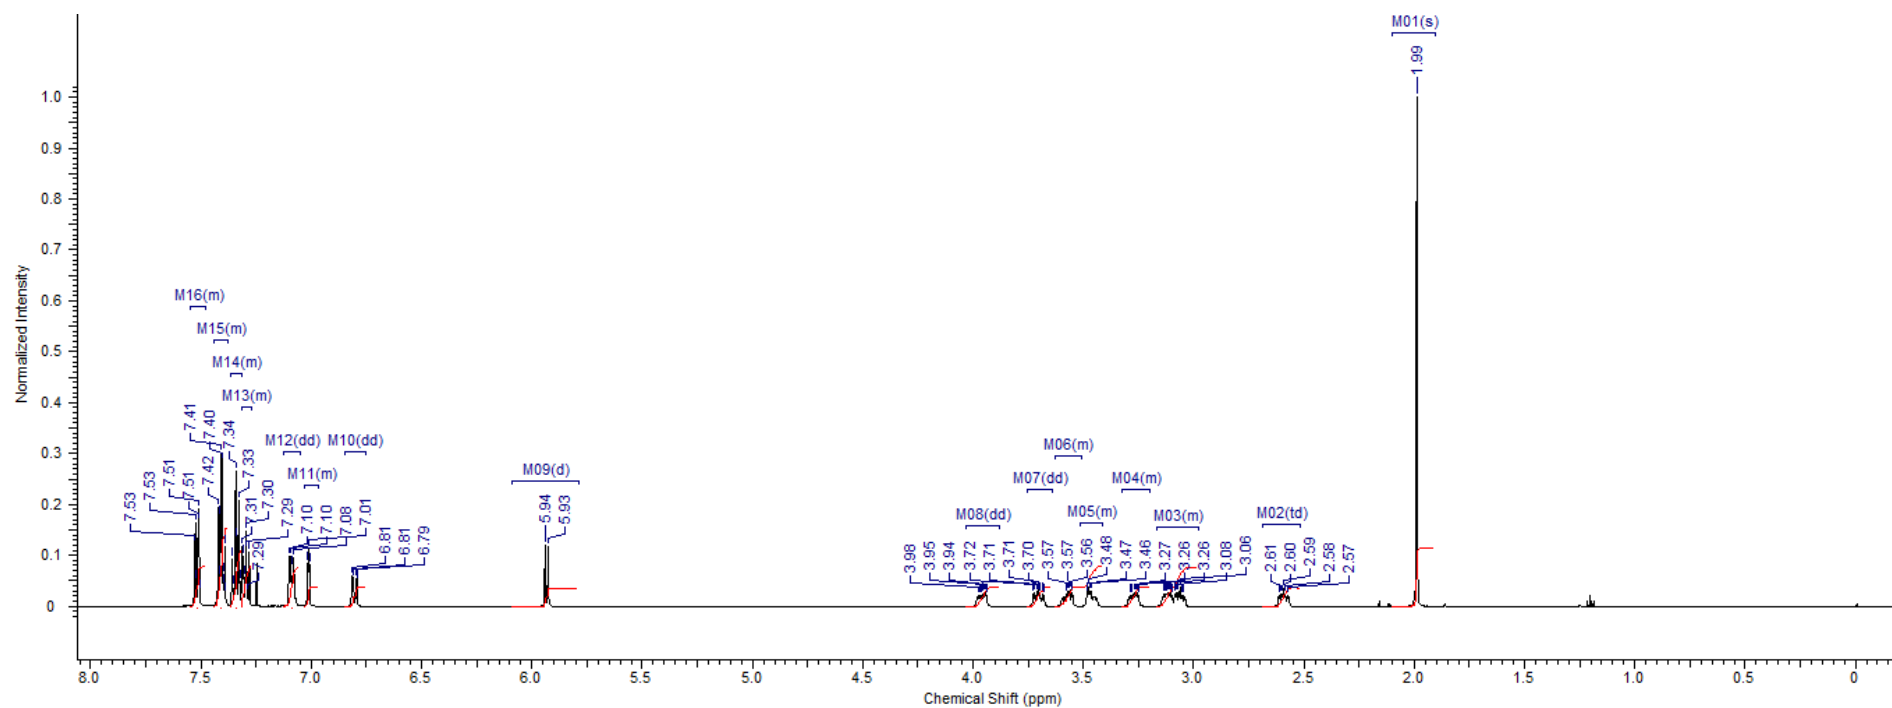

## Supporting Information

### *N*-(2-(4-([1,1'-biphenyl]-3-yl)piperazin-1-yl)-2-oxo-1-phenylethyl)acetamide (58) – $^{13}\text{C}$ NMR

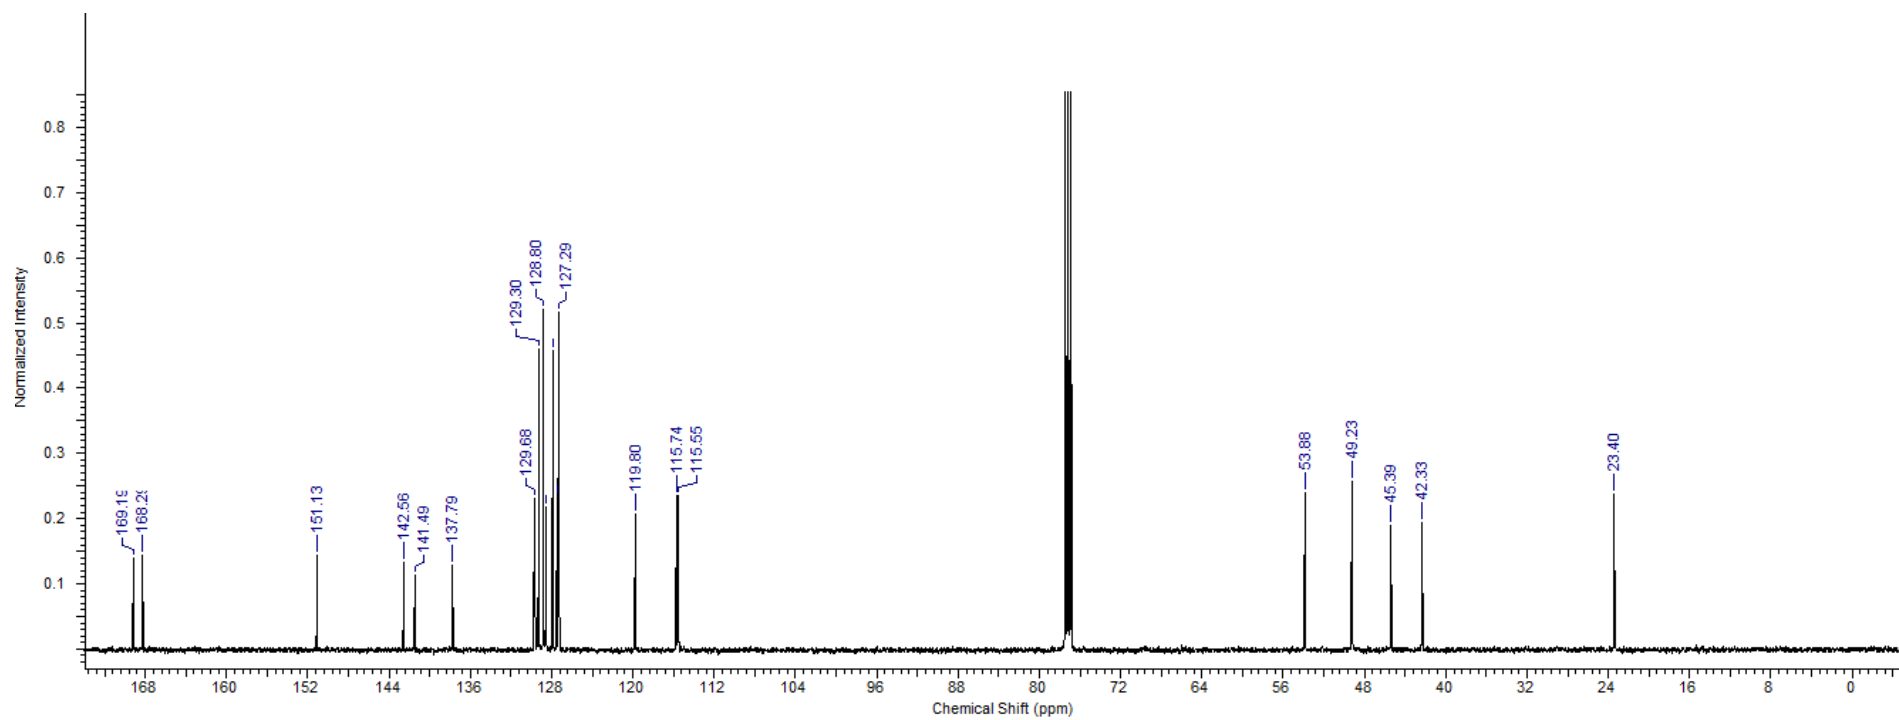

## Supporting Information

### *N*-(2-(4-(3-methoxyphenyl)piperazin-1-yl)-2-oxo-1-phenylethyl)acetamide (59) – $^1\text{H}$ NMR

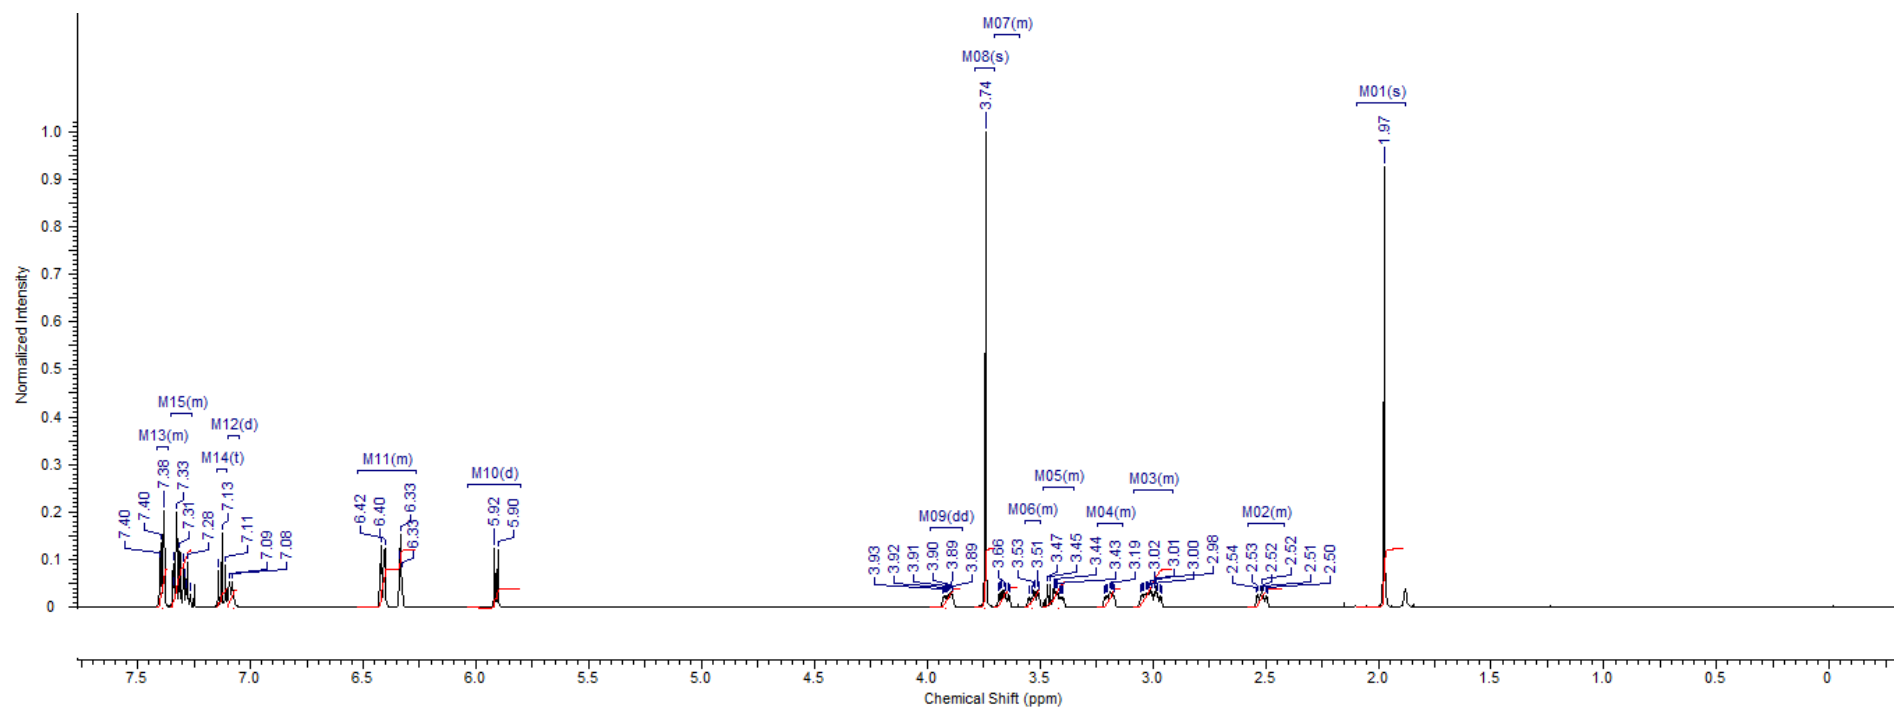

## Supporting Information

### *N*-(2-(4-(3-methoxyphenyl)piperazin-1-yl)-2-oxo-1-phenylethyl)acetamide (59) – $^{13}\text{C}$ NMR

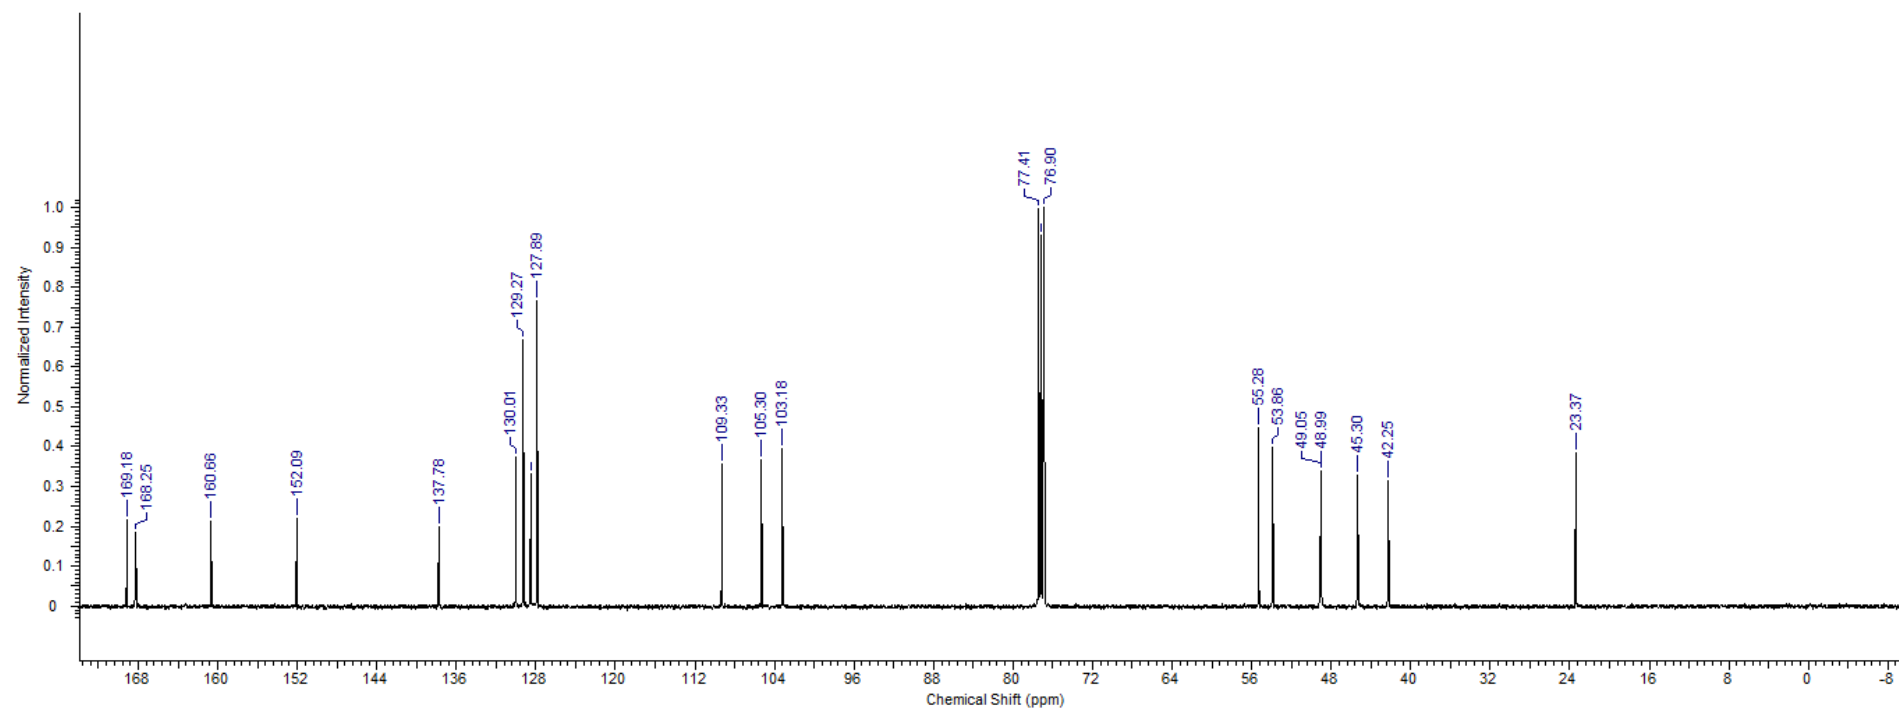

## Supporting Information

### *N*-(2-oxo-1-phenyl-2-(4-(3-(trifluoromethoxy)phenyl)piperazin-1-yl)ethyl)acetamide (60) – $^1\text{H}$ NMR

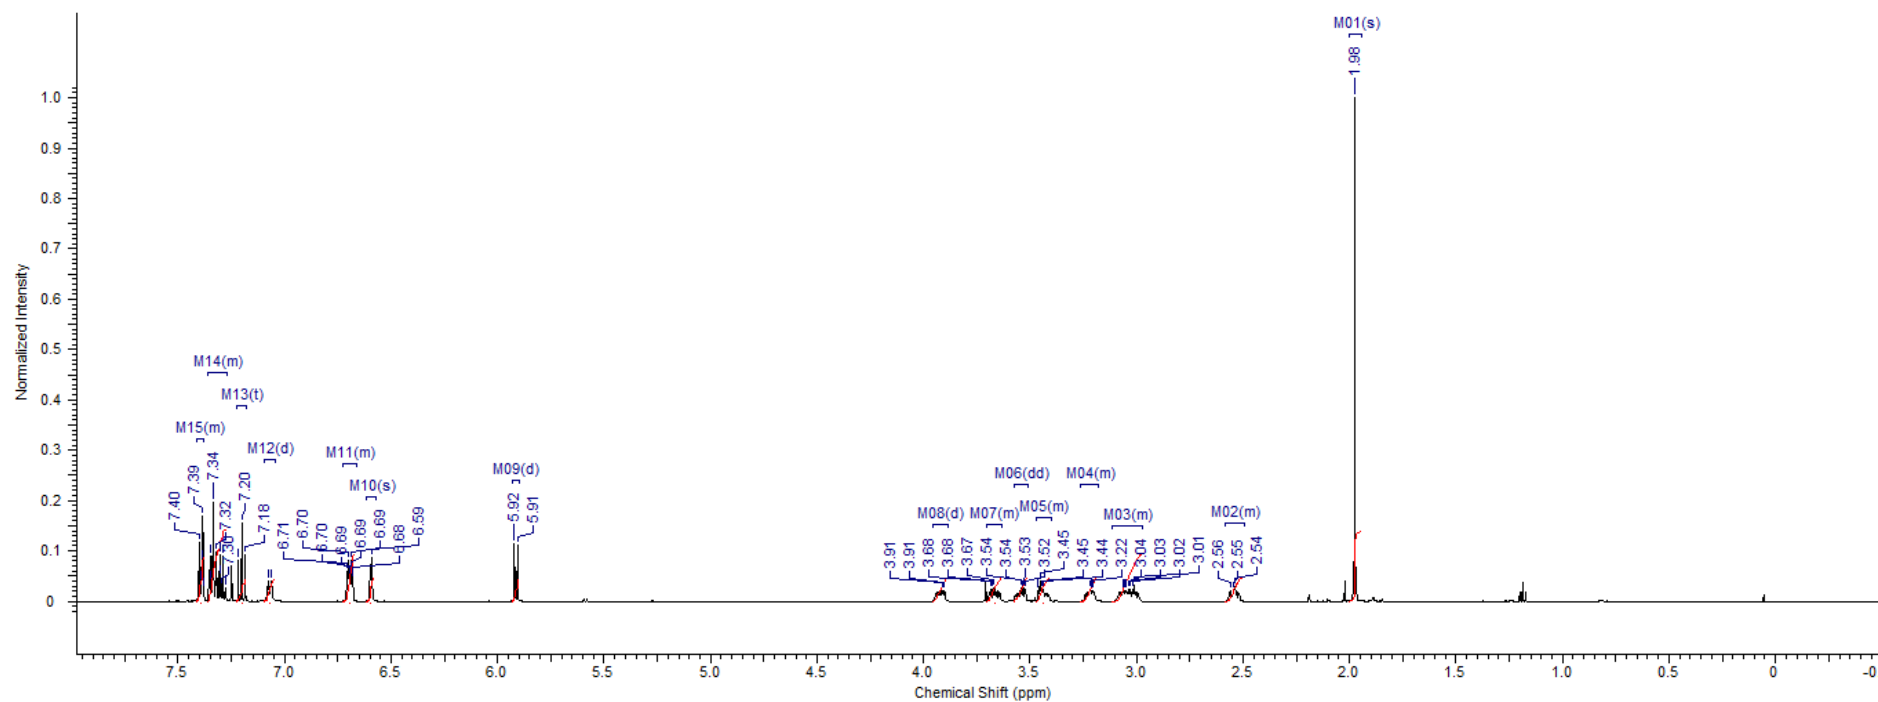



## Supporting Information

### *N*-(2-oxo-1-phenyl-2-(4-(3-(trifluoromethoxy)phenyl)piperazin-1-yl)ethyl)acetamide (60) – $^{13}\text{C}$ NMR

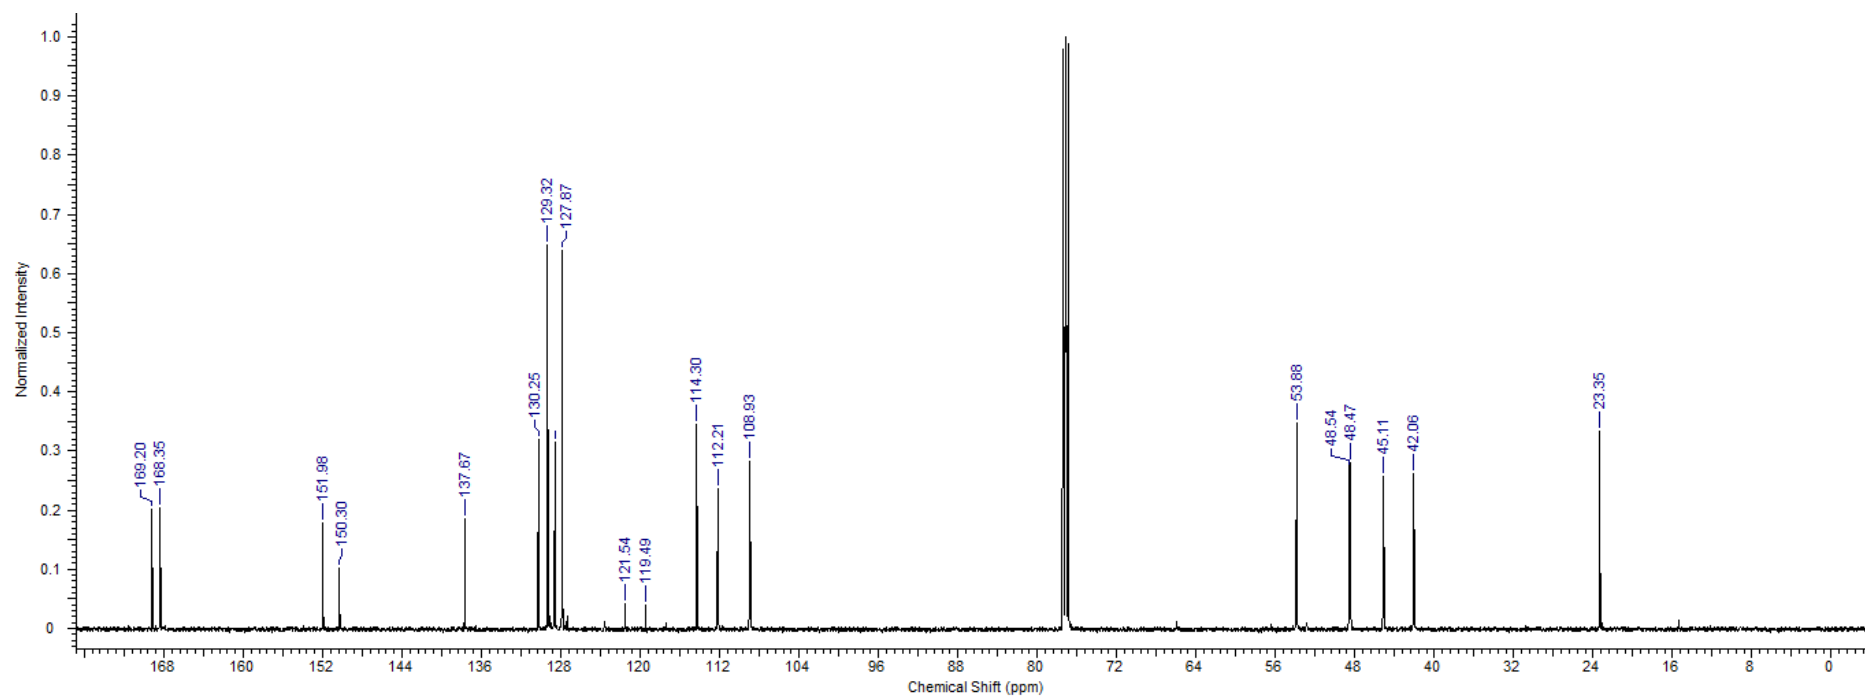

## Supporting Information

### *N*-(2-oxo-2-(4-(3-phenoxyphenyl)piperazin-1-yl)-1-phenylethyl)acetamide (61) – $^1\text{H}$ NMR

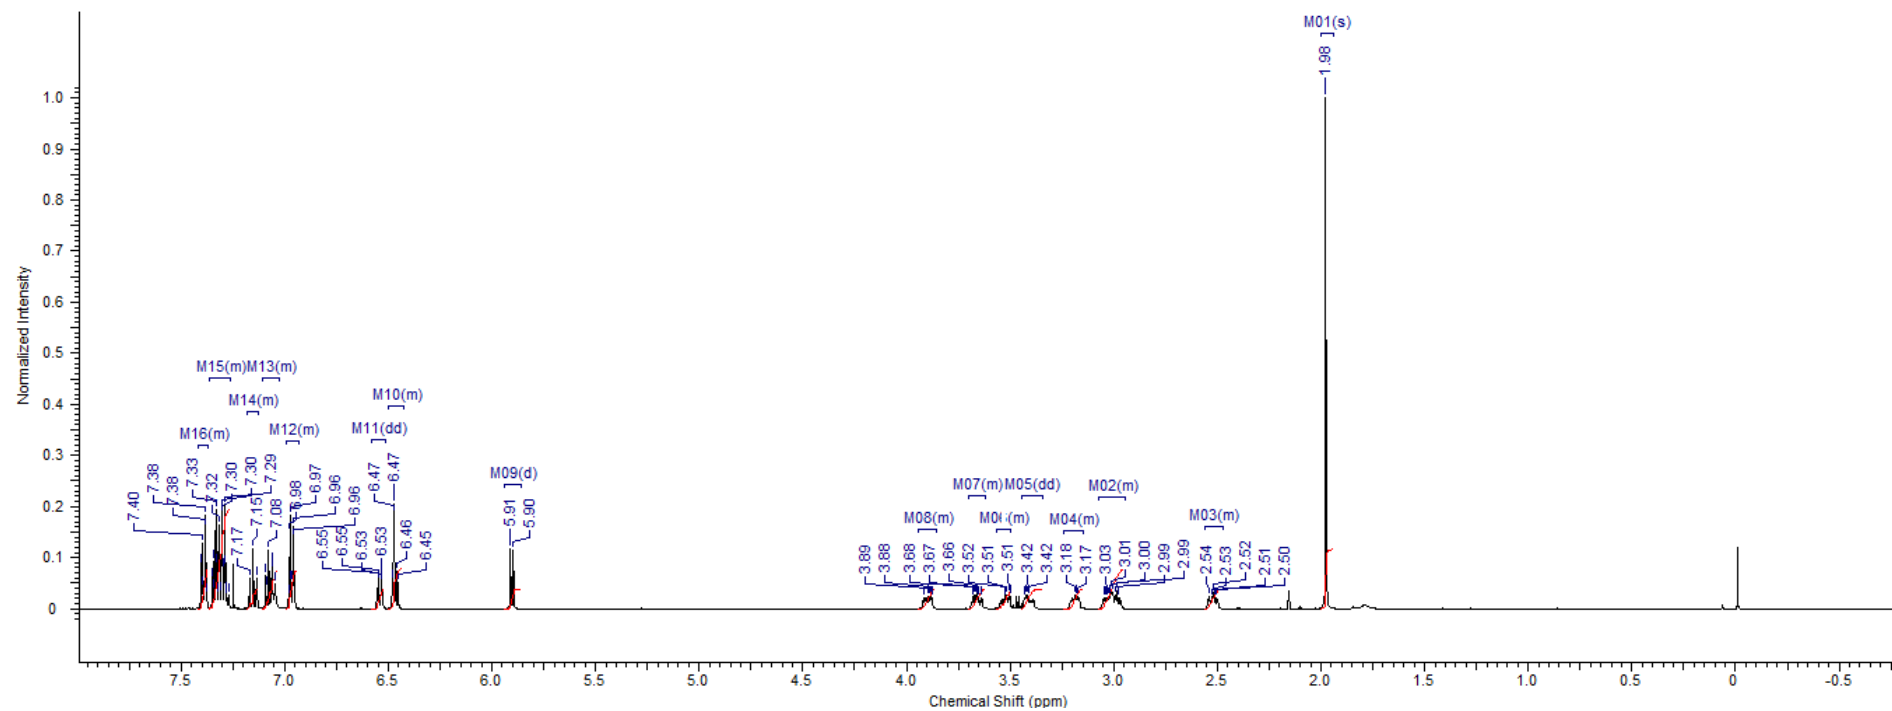

## Supporting Information

### *N*-(2-oxo-2-(4-(3-phenoxyphenyl)piperazin-1-yl)-1-phenylethyl)acetamide (61) – $^{13}\text{C}$ NMR

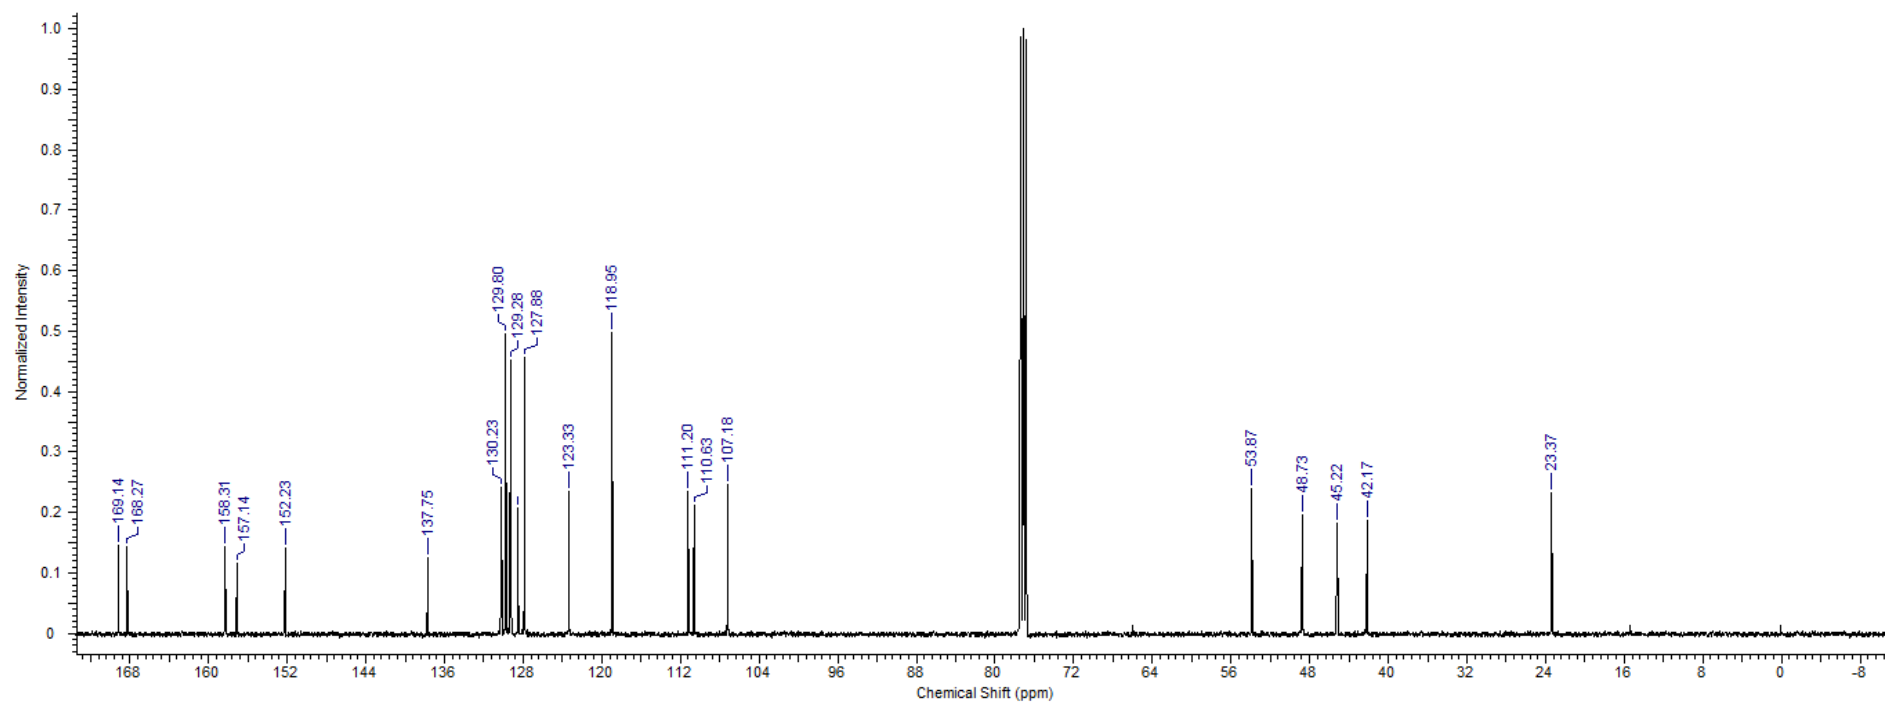

## Supporting Information

### *N*-(2-oxo-1-phenyl-2-(4-(3-((trifluoromethyl)thio)phenyl)piperazin-1-yl)ethyl)acetamide (62) – $^1\text{H}$ NMR

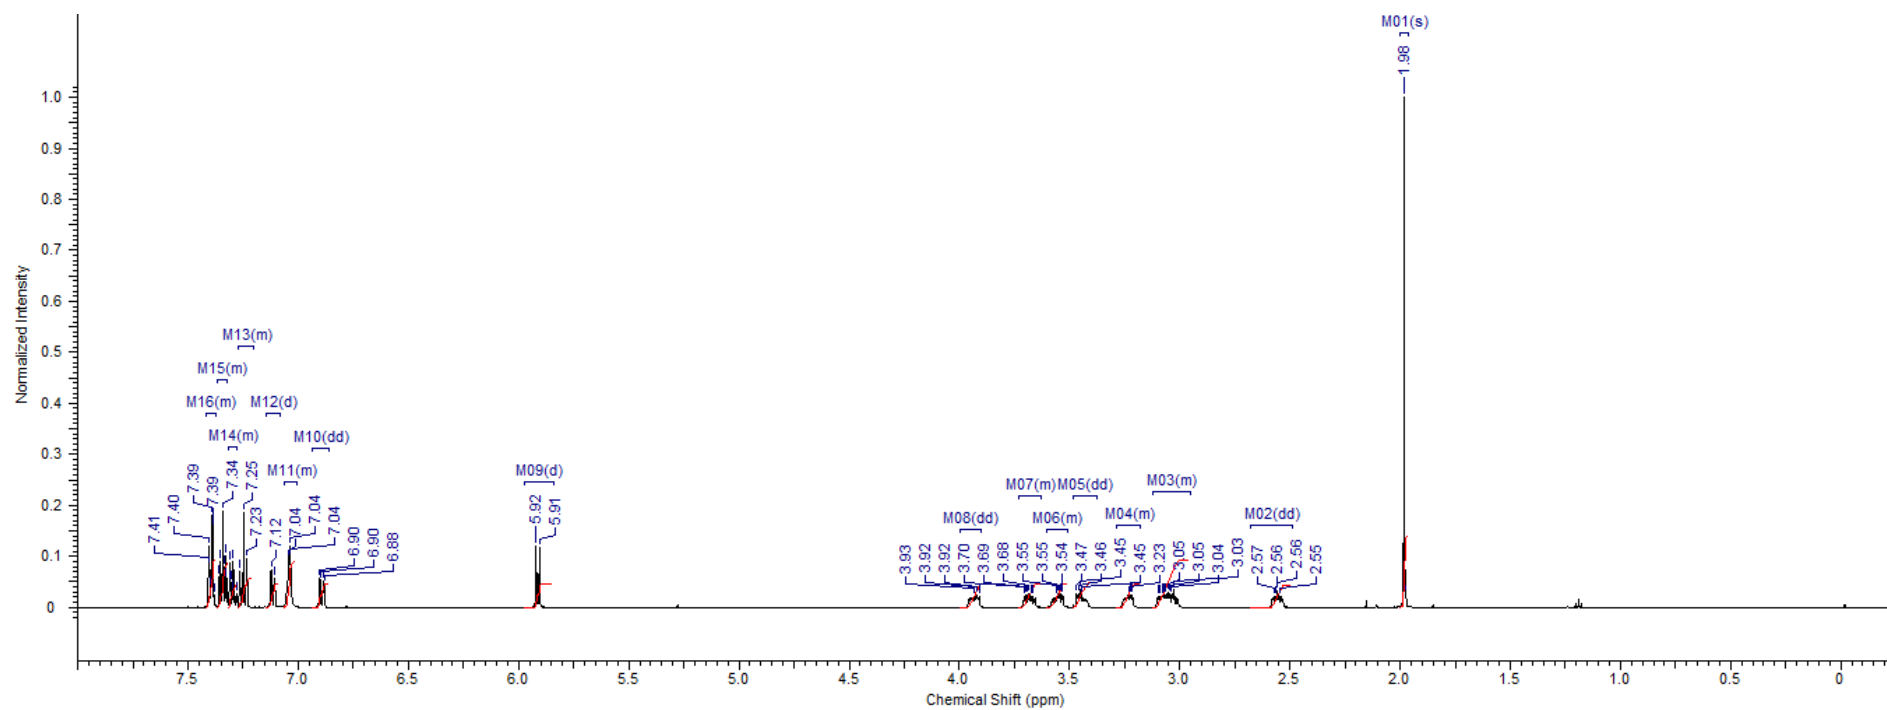

## Supporting Information

### *N*-(2-oxo-1-phenyl-2-(4-(3-((trifluoromethyl)thio)phenyl)piperazin-1-yl)ethyl)acetamide (62) – $^{13}\text{C}$ NMR

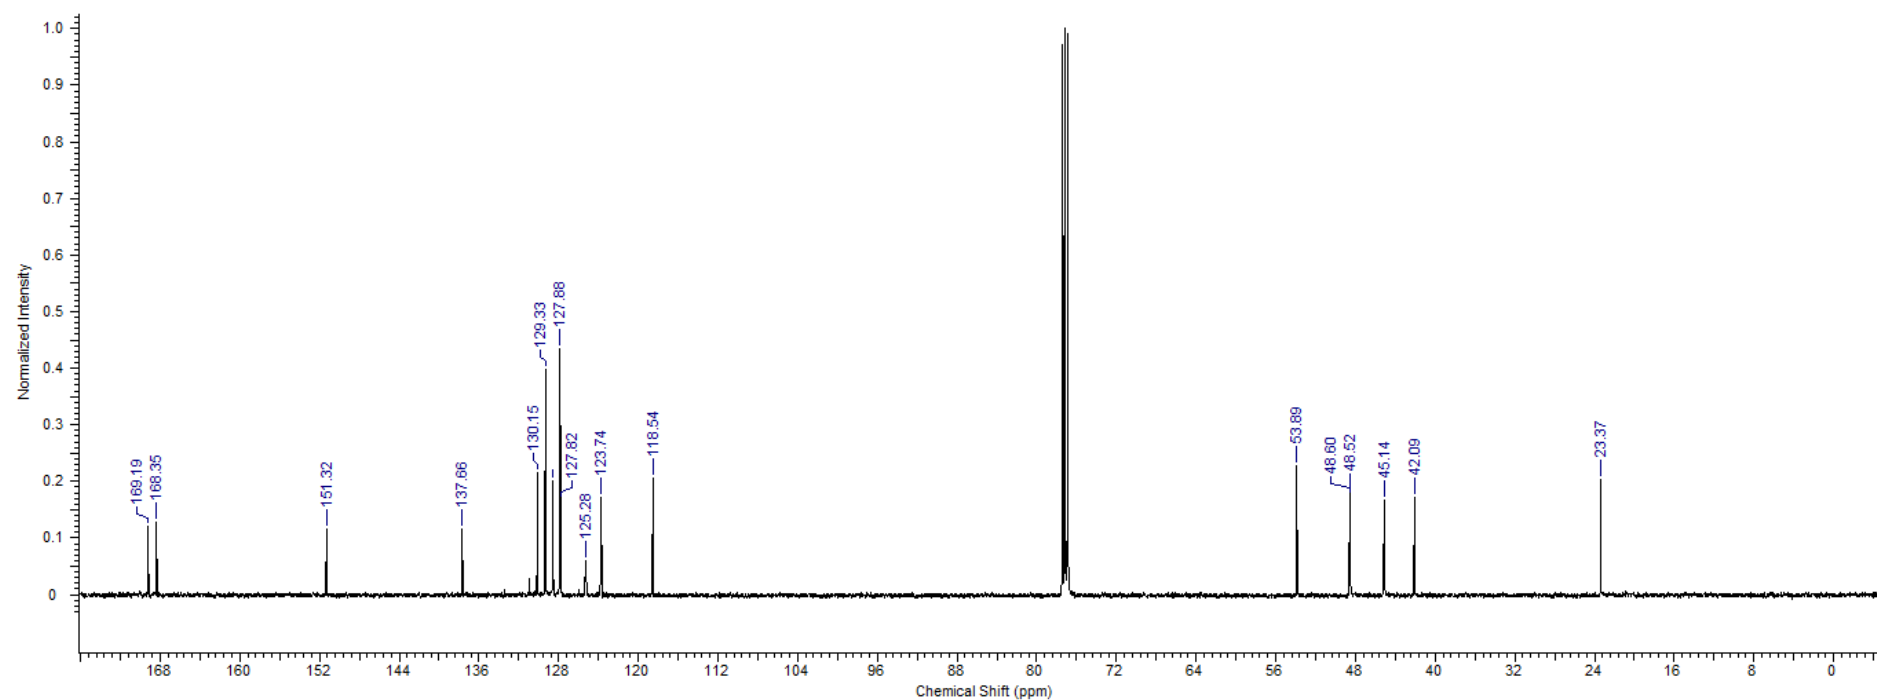

## Supporting Information

### *N*-(2-oxo-1-phenyl-2-(4-(3-(trifluoromethyl)pyridin-2-yl)piperazin-1-yl)ethyl)acetamide (63) – $^1\text{H}$ NMR

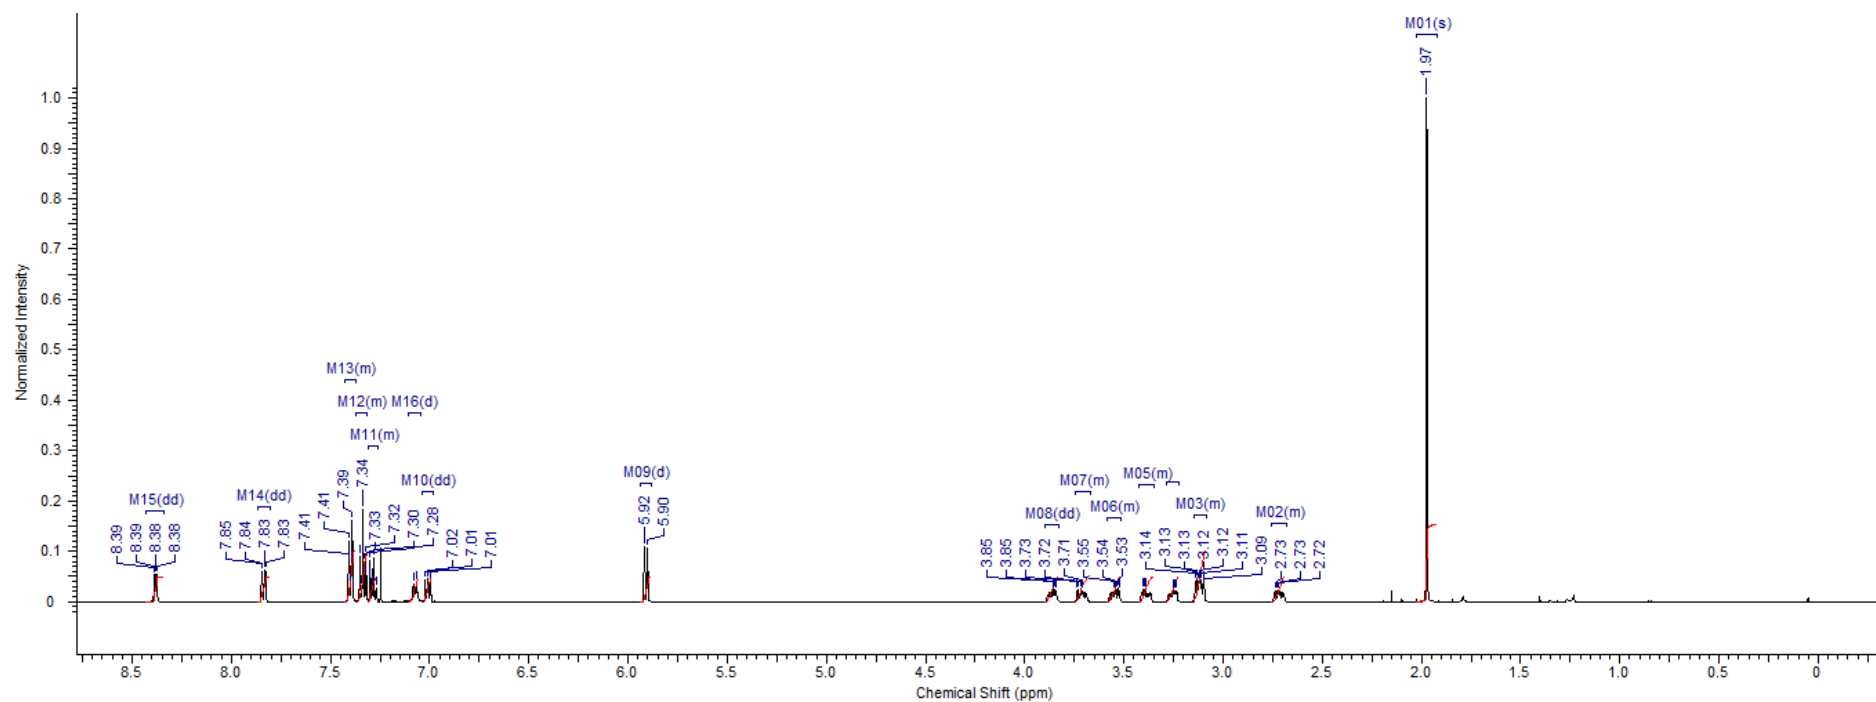

## Supporting Information

### *N*-(2-oxo-1-phenyl-2-(4-(3-(trifluoromethyl)pyridin-2-yl)piperazin-1-yl)ethyl)acetamide (63) – $^{13}\text{C}$ NMR

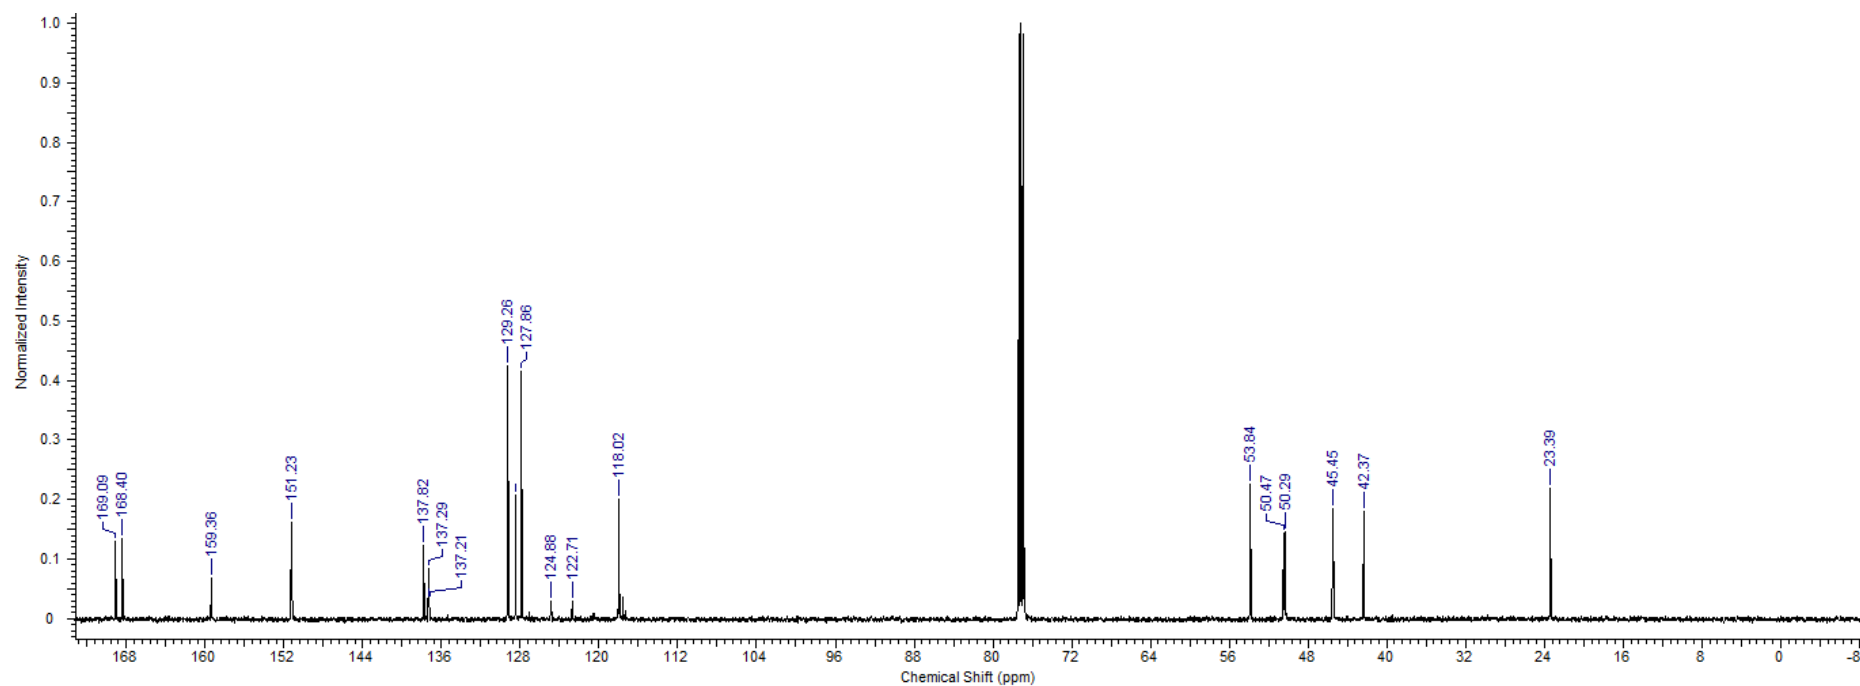

## Supporting Information

### *N*-(2-oxo-1-phenyl-2-(4-(4-(trifluoromethyl)pyridin-2-yl)piperazin-1-yl)ethyl)acetamide (64) – $^1\text{H}$ NMR

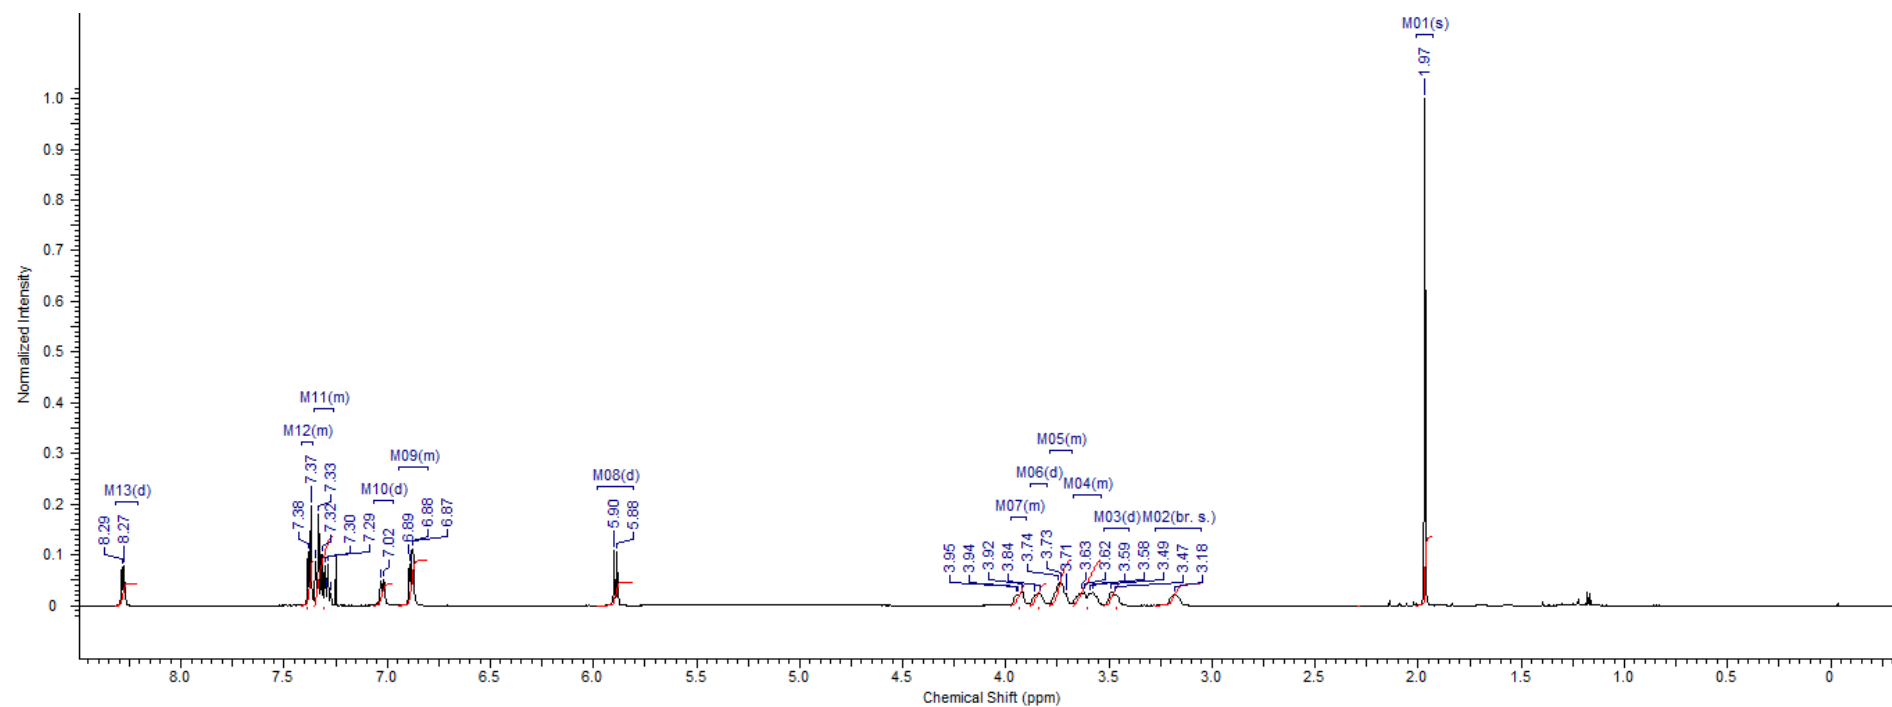



## Supporting Information

### *N*-(2-oxo-1-phenyl-2-(4-(4-(trifluoromethyl)pyridin-2-yl)piperazin-1-yl)ethyl)acetamide (64) – $^{13}\text{C}$ NMR

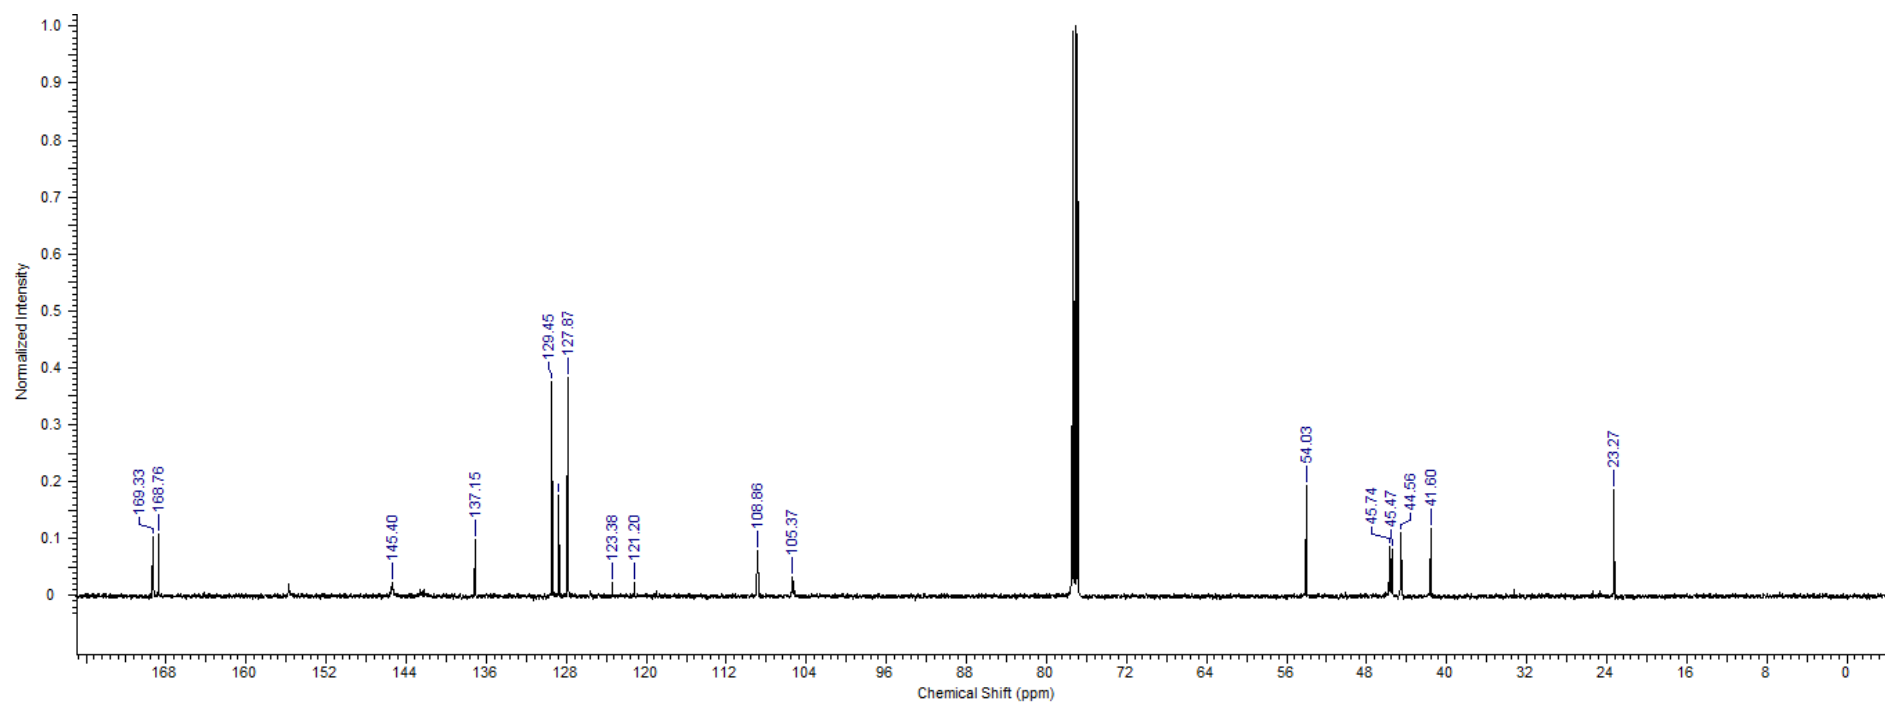

## Supporting Information

### *N*-(2-oxo-1-phenyl-2-(4-(5-(trifluoromethyl)pyridin-2-yl)piperazin-1-yl)ethyl)acetamide (65) – $^1\text{H}$ NMR

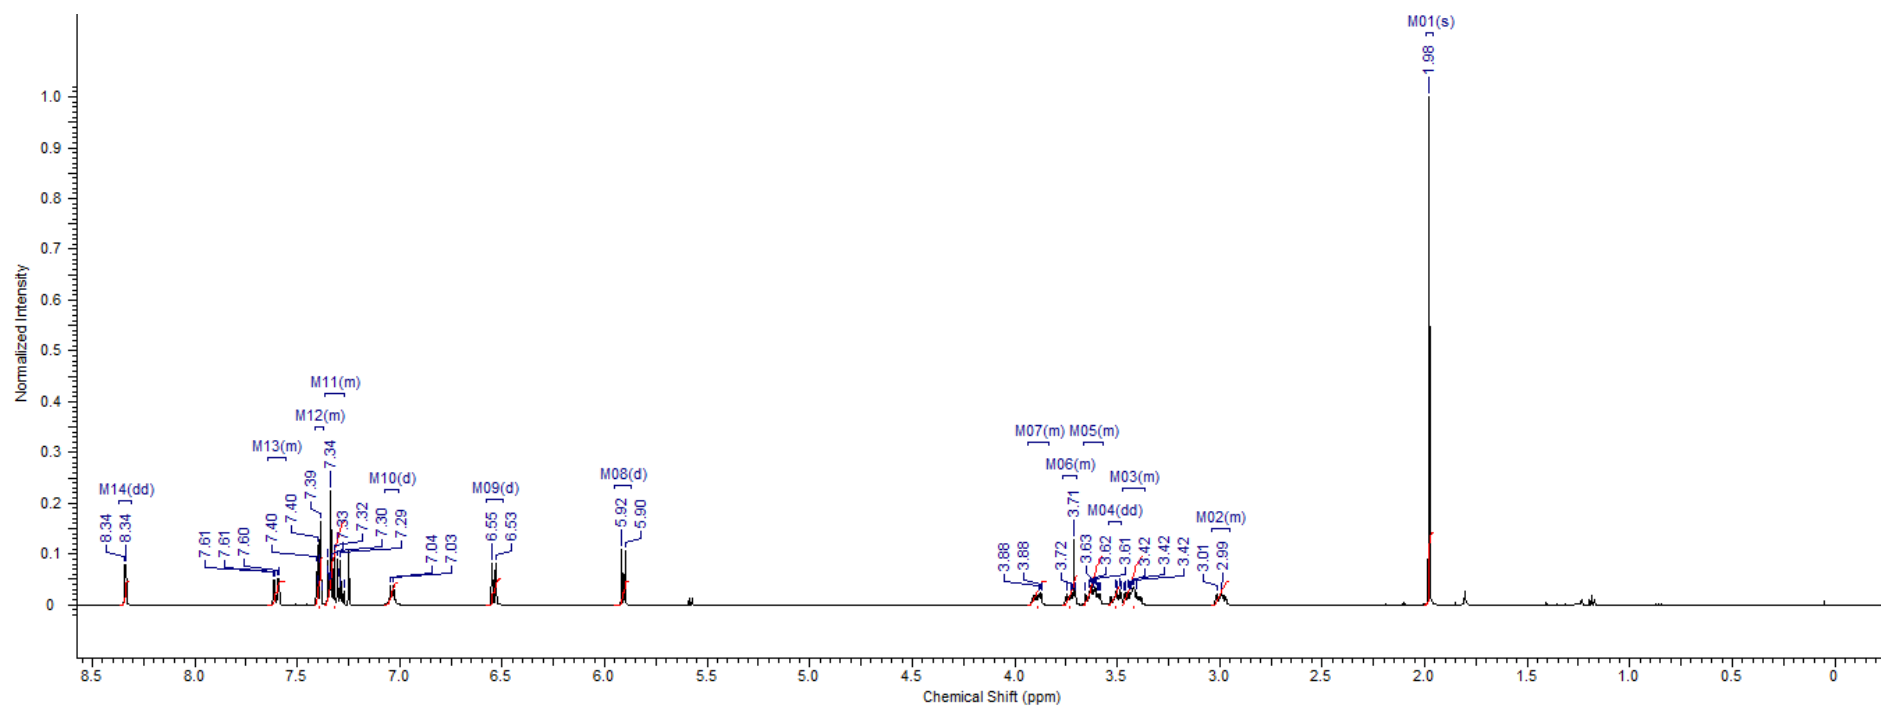

## Supporting Information

### *N*-(2-oxo-1-phenyl-2-(4-(5-(trifluoromethyl)pyridin-2-yl)piperazin-1-yl)ethyl)acetamide (65) – $^{13}\text{C}$ NMR

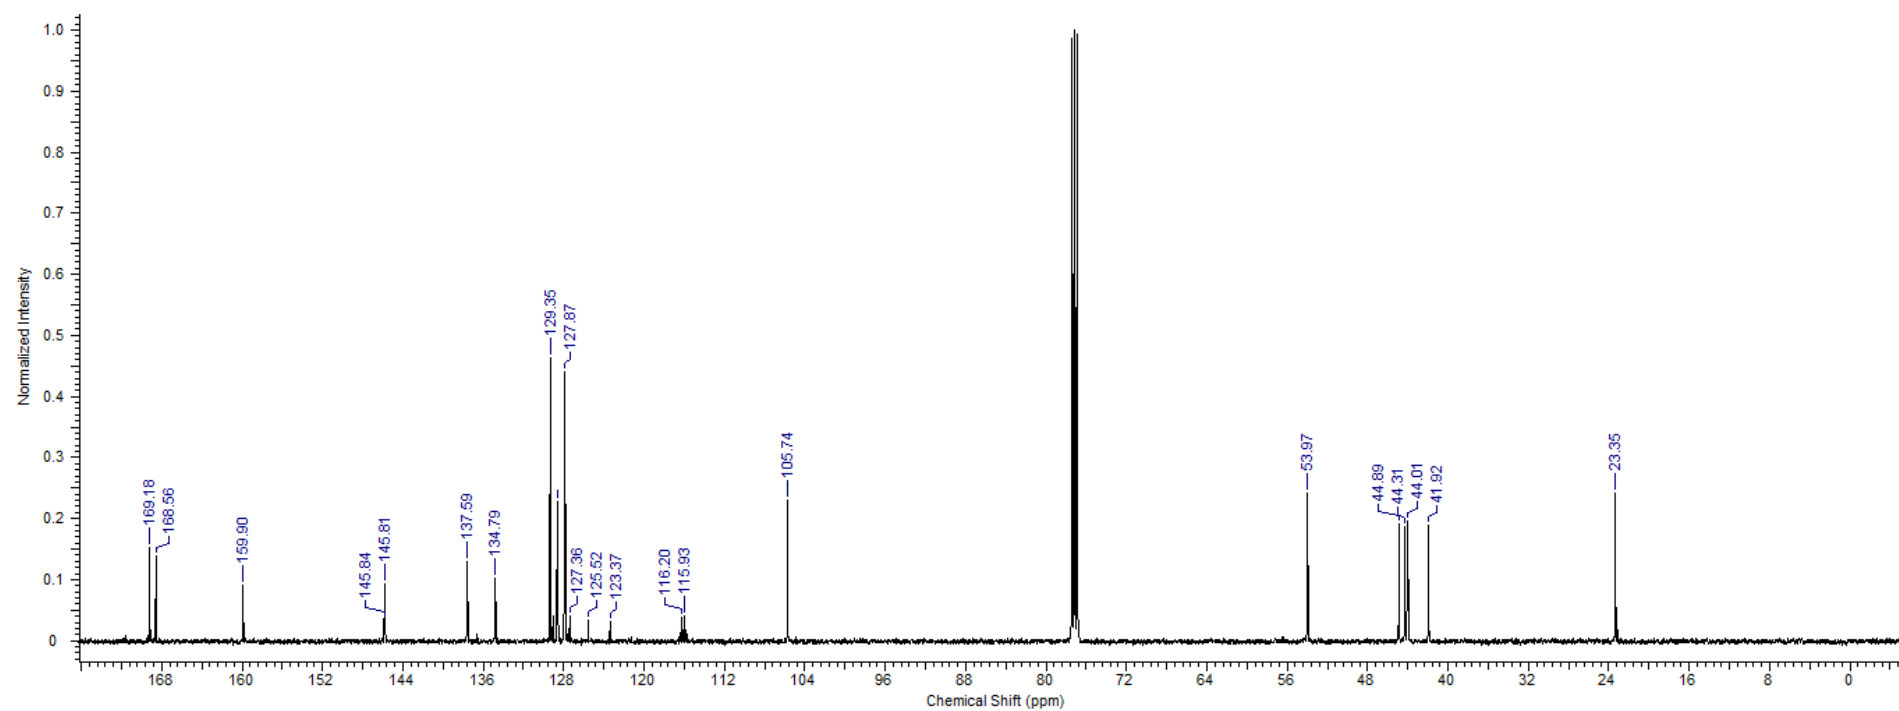

## Supporting Information

### *N*-(2-oxo-1-phenyl-2-(4-(6-(trifluoromethyl)pyridin-2-yl)piperazin-1-yl)ethyl)acetamide (66) – $^1\text{H}$ NMR

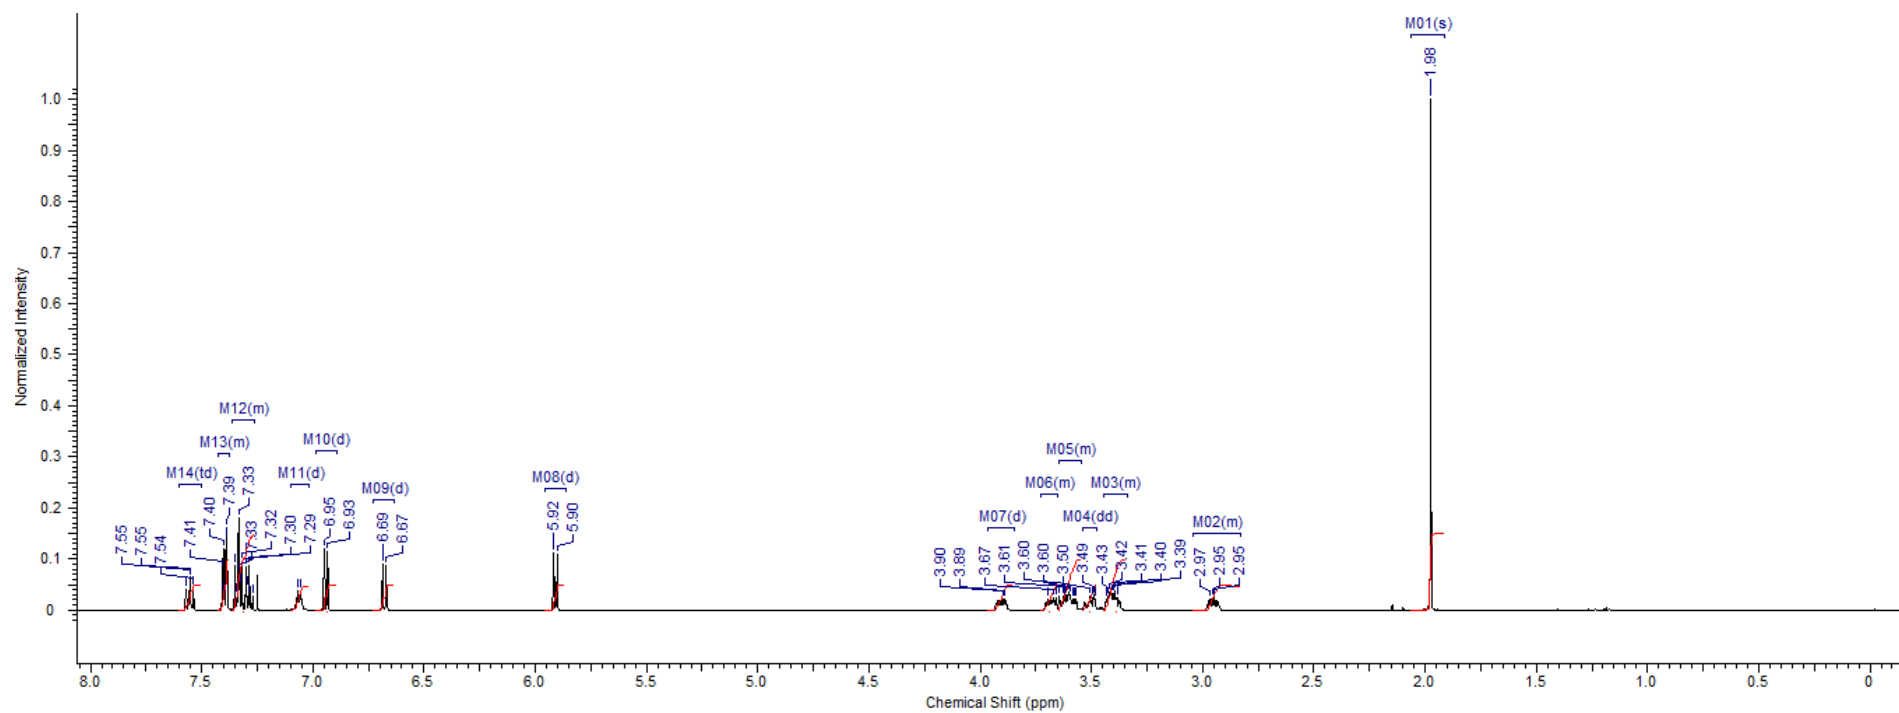

## Supporting Information

### *N*-(2-oxo-1-phenyl-2-(4-(6-(trifluoromethyl)pyridin-2-yl)piperazin-1-yl)ethyl)acetamide (66) – $^{13}\text{C}$ NMR

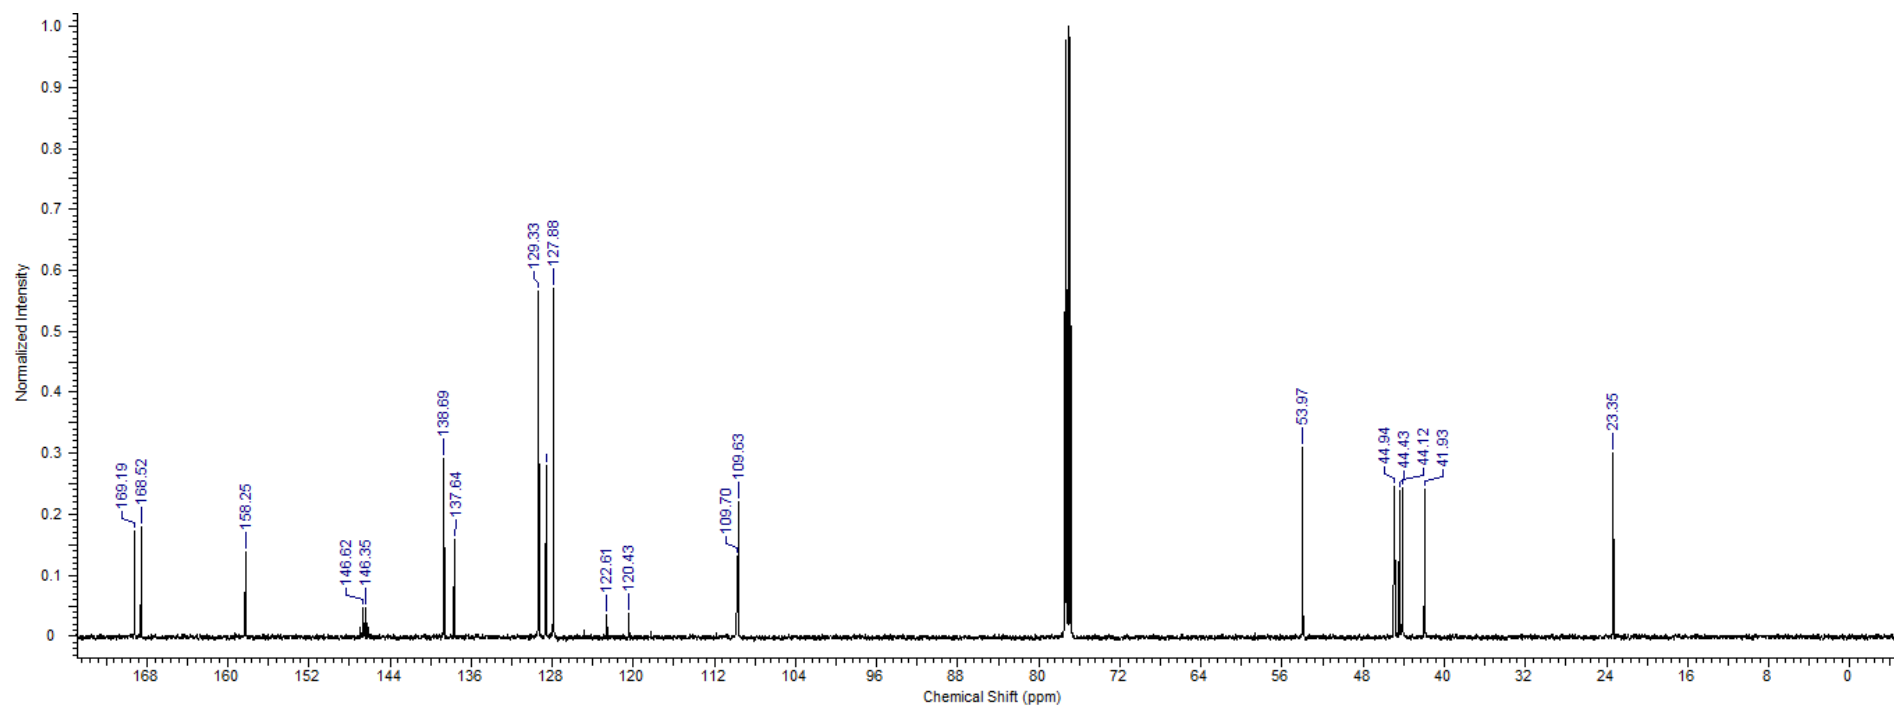

Supplement: s1 [file s1]
